# Supplementary material
Source: PubMed Central journal article supplement (PMC9955272)
Supplement: gg2c00002_si_001.pdf [file gg2c00002_si_001.pdf]

## Supporting Information

# Mechanistic facets of the competition between cross-coupling and homo-coupling in supporting ligand-free iron-mediated aryl-aryl bond formations.

*Edouard Zhou,<sup>[b,c]#</sup> Pablo Chourreu,<sup>[a,c]#</sup> Nicolas Lefèvre,<sup>[b]</sup> Mathieu Ahr,<sup>[b]</sup> Lidie Rousseau,<sup>[a,d]</sup>*

*Christian Herrero,<sup>[e]</sup> Eric Gayon,<sup>[c]</sup> Gérard Cahiez,<sup>\*[b]</sup> and Guillaume Lefèvre<sup>\*[a]</sup>*

<sup>[a]</sup> Chimie ParisTech, PSL University, CNRS, Institute of Chemistry for Life and Health Sciences, CSB2D, 75005 Paris, France.

<sup>[b]</sup> Institut de Recherche de Chimie Paris, CNRS UMR8247, Chimie ParisTech, PSL Research University, 11 rue Pierre et Marie Curie, 75005 Paris, France.

<sup>[c]</sup> M2i Development, Bâtiment ChemStart'Up, 64170 Lacq, France.

<sup>[d]</sup> Université Paris-Saclay, CEA, CNRS, NIMBE, 91191 Gif-sur-Yvette cedex, France.

<sup>[e]</sup> Institut de Chimie Moléculaire et des Matériaux d'Orsay (UMR 8182) Univ. Paris Sud, Université Paris Saclay 91405 Orsay cedex (France)

# equal contributions.

|                                                                    |     |
|--------------------------------------------------------------------|-----|
| 1. Instrumentation and Chemicals                                   | S2  |
| 2. Experimental Procedures                                         | S3  |
| 3. Characterization Data                                           | S4  |
| 4. <sup>1</sup> H, <sup>13</sup> C and <sup>19</sup> F NMR Spectra | S13 |

|                               |     |
|-------------------------------|-----|
| 5. DFT calculations           | S58 |
| 6. EPR spectroscopy           | S86 |
| 7. Experimental Hammett plots | S88 |
| 8. References                 | S88 |

## 1. Instrumentation and Chemicals

Gas chromatography analyses (GC) were performed on a Shimadzu Chromatograph 2010 Plus apparatus equipped with a flame ionization detector. The capillary column is a Zebron ZB-5MS (length: 10 m, I.D.: 0.10 mm, film thickness: 0.10  $\mu\text{m}$ , 5% polysilarylene / 95% polydimethylsiloxane). Hydrogen was used as a carrier gas (1.14 mL/min, ratio split: 80). Standard analysis conditions: 40  $^{\circ}\text{C}$  (hold 1 min) to 200  $^{\circ}\text{C}$  (hold 3.5 min), heating rate: 30  $^{\circ}\text{C}/\text{min}$ .

Thin layer chromatography (TLC) was carried out on silica gel plates (Carlo Erba 60 F254). Spots were detected with UV light.

Flash chromatography were performed on silica gel columns (Carlo Erba, spherical, neutral, 40-60  $\mu\text{m}$ ).

$^1\text{H}$  NMR (300 MHz,  $\text{CDCl}_3$ ),  $^{13}\text{C}$  NMR (75 MHz,  $\text{CDCl}_3$ ) and  $^{19}\text{F}$  NMR (282 MHz,  $\text{CDCl}_3$ ) were recorded on a Bruker Advance 300 instrument. Chemical shifts ( $\delta$ ) are given in ppm from TMS ( $^1\text{H}$ ,  $^{13}\text{C}$ ) and Trichlorofluoromethane ( $^{19}\text{F}$ ). Coupling constants ( $J$ ) are given in Hz. The following abbreviations are used: s, singlet, d, doublet, t, triplet, q, quartet, m, multiplet, dm, doublet of multiplet.

Mass spectra were recorded on a Hewlett-Packart HP 5973 mass spectrometer via a GC/MS coupling with a Hewlett-Packart HP 6890 chromatograph equipped with a capillary column HP-5MS (50 m x 0.25 mm x 0.25  $\mu\text{m}$ ). Ionization was performed by electronic impact (EI, 70 eV). Mass spectra are reported as  $m/z$  (% of relative intensity).

THF (VWR, AnalaR Normapur for synthesis, 99.9%), iron(III) chloride (Acros, 99.9+%), iron(III) acetylacetonate (Sigma Aldrich, 99.9+%), magnesium turning (Acros, 99.9+%), bromobenzene (Alfa Aesar, 99%), 4-bromotoluene (Alfa Aesar, 99%), 3-bromotoluene (Alfa Aesar, 99%), 4-bromoanisole (Acros, 98%), 2-bromoanisole (Alfa Aesar, 98%), 4-fluorobromobenzene (Alfa Aesar, 99%), 4-bromo-*N,N*-dimethylaniline (Alfa Aesar, 98+%), 2-bromomesitylene (Alfa Aesar, 99%), 1-bromonaphthalene

(Aldrich, 98%), 2-bromonaphthalene (Alfa Aesar, 98+%), chloropentafluorobenzene (Alfa Aesar, 99.9%), 2-chloropyridine (Sigma Aldrich, 99%), ethyl 4-bromobenzoate (Alfa Aesar, 98+%), ethyl 4-chlorobenzoate (Acros, 98%), undecane (Acros, 99%) were used without purification. Iron(II) chloride was dried from iron(II) chloride tetrahydrate (Acros, 99+) at 180 °C/ 10<sup>-2</sup> Torr, *N*-methylpyrrolidone (NMP) was distilled at 78 °C/ 12 Torr.

## 2. Experimental Procedures

**General Procedure for the Iron-catalyzed reaction of aryl Grignard reagent with C<sub>6</sub>F<sub>5</sub>Cl.** A dry and argon flushed 100 mL four-necked flask, equipped with a mechanical stirrer, a thermometer, an argon inlet and a septum, was charged with chloropentafluorobenzene C<sub>6</sub>F<sub>5</sub>Cl (10 mmol, 2.03 g, 1 equiv.), FeCl<sub>3</sub> (0.3 mmol, 48.7 mg, 3 mol%) and THF (20 mL). The THF solution of aryl Grignard reagent (12 mmol, around 1 mol/L, 1.2 equiv.) was added in 30 min through a syringe-pump. The temperature can rise up to 40 °C. After 4 h at room temperature, the mixture was quenched with 50 mL of HCl 1 M. The aqueous phase was extracted with 3x50 mL of dichloromethane, and the combined organic layers were washed with brine (50 mL), dried with MgSO<sub>4</sub> and concentrated under reduced pressure at 40 °C. The product was purified by chromatography. The eluent is given in the characterization section.

**General Procedure for the Iron-catalyzed reaction of aryl Grignard reagent with 2-chloropyridine.** A dry and argon flushed 100 mL four-necked flask, equipped with a mechanical stirrer, a thermometer, an argon inlet and a septum, was charged with 2-chloropyridine (10 mmol, 1.89 mL, 1 equiv.), Fe(acac)<sub>3</sub> (0.5 mmol, 35.3 mg, 5 mol%) and THF (50 mL). The THF solution of aryl Grignard reagent (12 mmol, around 1 mol/L, 1.2 equiv.) was added in 30 min through a syringe-pump. After 3 h at 0 °C, the mixture was quenched with 50 mL of HCl 1 M. The aqueous phase was extracted with 3x50 mL of dichloromethane, and the combined organic layers were washed with brine (50 mL), dried with MgSO<sub>4</sub> and concentrated under reduced pressure at 40 °C. The product was purified by chromatography. The eluent is given in the characterization section.

**Reduction of FeCl<sub>x</sub> by Aryl Grignard Reagents. General Procedure.** A dry and argon flushed 250 mL four-necked flask, equipped with a mechanical stirrer, a thermometer, an argon inlet and a dropping funnel, was charged with FeCl<sub>3</sub> (13 mmol, 2.11 g, 1 equiv.) or FeCl<sub>2</sub> (13 mmol, 1.65 g, 1 equiv.) and THF (13 mL). The dropping funnel was charged with a THF solution of aryl Grignard reagent (130

mmol, around 1 mol/L, 10 equiv.). The THF solution of Grignard reagent was added at room temperature in 3 min. The temperature can rise up to 40 °C. The reaction was monitored by GC.

**Evidence of the formation of  $C_6F_5MgX$  during the homocoupling reaction.** A dry and argon flushed 500 mL four-necked flask, equipped with a mechanical stirrer, a thermometer, an argon inlet and a dropping funnel, was charged with  $FeCl_3$  (3 mmol, 0.487 g, 3%), chloropentafluorobenzene  $C_6F_5Cl$  (55 mmol, 11.14 g, 1 equiv.) and THF (150 mL). A THF solution of 4-MeOC<sub>6</sub>H<sub>4</sub>MgBr (110 mmol, 1 mol/L, 91.7 mL, 2 equiv.) was added dropwise rapidly, the temperature can rise up to 40 °C. After 4 h at room temperature, the octanoic anhydride (60 mmol, 16.22 g, 1.2 equiv.) was added. Stirring was continued for 1 h, then the reaction mixture was quenched with 250 mL of HCl 1 mol/L and the aqueous phase was extracted with 3x200 mL of dichloromethane. The combined organic layers were washed with 100 mL of water, dried with  $MgSO_4$  and concentrated under reduced pressure at 40 °C. The product was purified by chromatography on silica gel. Fractions which contain the 1-(pentafluorophenyl)-octan-1-one were concentrated under reduced pressure at 40 °C, then the product was distilled with a Kugelrohr at 100 °C/10<sup>-2</sup> Torr.

### 3. Characterization Data

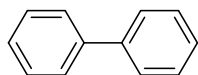

**1a**

#### **Biphenyl (1a).**

GC:  $t_R = 4.030$  min.

Purification: Chromatography; Eluent: Petroleum ether/Ethyl acetate 15:1.

<sup>1</sup>H-NMR ( $CDCl_3$ , 300 MHz): 7.61 – 7.58 (m, 4H), 7.45 – 7.41 (m, 4H), 7.37 – 7.31 (m, 2H).

<sup>13</sup>C-NMR ( $CDCl_3$ , 75 MHz): 140.4 (2C), 127.9 (4C), 126.4 (2C), 126.3 (4C).

Spectroscopic data were in accordance with literature data.<sup>1</sup>

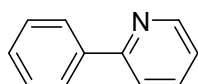

**1b**

### 2-Phenylpyridine (1b).

GC:  $t_R = 4.380$  min.

Purification: Chromatography; Eluent: Petroleum ether/Ethyl acetate 15:1.

$^1\text{H-NMR}$  ( $\text{CDCl}_3$ , 300 MHz): 8.77 – 8.66 (m, 1H), 8.04 – 7.96 (m, 2H), 7.80 – 7.71 (m, 2H), 7.52 – 7.45 (m, 2H), 7.45 – 7.40 (m, 1H), 7.26 – 7.22 (m, 1H).

$^{13}\text{C-NMR}$  ( $\text{CDCl}_3$ , 75 MHz): 157.5, 149.7, 139.4, 137.1, 129.2, 128.9 (2C), 127.1 (2C), 122.3, 120.8.

Spectroscopic data were in accordance with literature data.<sup>1</sup>

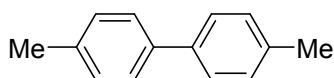

**2a**

### 4,4'-Dimethylbiphenyl (2a).

GC:  $t_R = 4.996$  min.

Purification: Chromatography; Eluent: Petroleum ether/Ethyl acetate 15:1.

$^1\text{H-NMR}$  ( $\text{CDCl}_3$ , 300 MHz): 7.49 – 7.45 (m, 4H), 7.24 – 7.21 (m, 4H), 2.38 (s, 6H).

$^{13}\text{C-NMR}$  ( $\text{CDCl}_3$ , 75 MHz): 137.5 (2C), 135.8 (2C), 128.6 (4C), 126.0 (4C), 20.2 (2C).

Spectroscopic data were in accordance with literature data.<sup>2</sup>

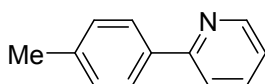

**2b**

### 2-(*p*-Tolyl)pyridine (2b).

GC:  $t_R = 4.780$  min.

Purification: Chromatography; Eluent: Petroleum ether/Ethyl acetate 15:1.

$^1\text{H-NMR}$  ( $\text{CDCl}_3$ , 300 MHz): 8.68 (ddd,  $J = 4.9, 1.6, 1.1$  Hz, 1H), 7.93 – 7.86 (m, 2H), 7.77 – 7.68 (m, 2H), 7.29 (dd,  $J = 8.5, 0.6$  Hz, 2H), 7.21 (ddd,  $J = 6.7, 4.9, 1.8$  Hz, 1H), 2.41 (s, 3H).

$^{13}\text{C-NMR}$  ( $\text{CDCl}_3$ , 75 MHz): 157.5, 149.6, 139.1, 137.0, 136.6, 129.6 (2C), 126.9 (2C), 122.0, 120.5, 21.4.

Spectroscopic data were in accordance with literature data.<sup>3</sup>

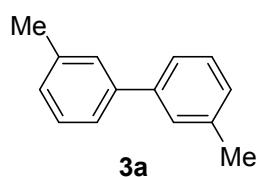

**3,3'-Dimethyl-1,1'-biphenyl (3a).**

GC:  $t_R$  = 4.880 min.

Purification: Chromatography; Eluent: Petroleum ether/Ethyl acetate 15:1.

$^1\text{H-NMR}$  ( $\text{CDCl}_3$ , 300 MHz): 7.47 – 7.41 (m, 4H), 7.39 – 7.34 (m, 2H), 7.22 – 7.18 (m, 2H), 2.47 (s, 6H).

$^{13}\text{C-NMR}$  ( $\text{CDCl}_3$ , 75 MHz): 141.5 (2C), 138.4 (2C), 128.7 (2C), 128.1 (2C), 128.0 (2C), 124.4 (2C), 21.7 (2C).

Spectroscopic data were in accordance with literature data.<sup>5</sup>

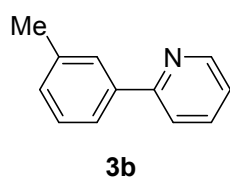

**2-(*m*-Tolyl)pyridine (3b).**

GC:  $t_R$  = 4.690 min.

Purification: Chromatography; Eluent: Petroleum ether/Ethyl acetate 15:1.

$^1\text{H-NMR}$  ( $\text{CDCl}_3$ , 300 MHz): 8.73 – 8.67 (m, 1H), 7.84 (s, 1H), 7.80 – 7.70 (m, 3H), 7.37 (t,  $J$  = 7.6 Hz, 1H), 7.23 (ddd,  $J$  = 6.7, 4.9, 1.6 Hz, 2H), 2.44 (s, 3H).

$^{13}\text{C-NMR}$  ( $\text{CDCl}_3$ , 75 MHz): 157.7, 149.6, 139.3, 138.6, 137.1, 130.0, 128.8, 127.8, 124.2, 122.2, 120.9, 21.7.

Spectroscopic data were in accordance with literature data.<sup>4</sup>

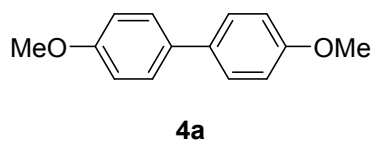

**4,4'-Dimethoxybiphenyl (4a).**

GC:  $t_R$  = 6.141 min.

Purification: Chromatography; Eluent: Petroleum ether/Ethyl acetate 15:1.

$^1\text{H-NMR}$  ( $\text{CDCl}_3$ , 300 MHz): 7.48 – 7.43 (m, 4H), 6.96 – 6.91 (m, 4H), 3.83 (s, 6H).

$^{13}\text{C-NMR}$  ( $\text{CDCl}_3$ , 75 MHz): 157.9 (2C), 132.7 (2C), 126.9 (4C), 113.4 (4C), 54.5 (2C).

Spectroscopic data were in accordance with literature data.<sup>5</sup>

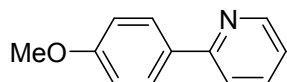

**4b**

### 2-(4-Methoxyphenyl)pyridine (4b).

GC:  $t_R$  = 5.242 min.

Purification: Chromatography; Eluent: Petroleum ether/Ethyl acetate 15:1.

$^1\text{H-NMR}$  ( $\text{CDCl}_3$ , 300 MHz): 8.67 (d,  $J$  = 4.3 Hz, 1H), 8.03 – 7.93 (m, 2H), 7.77 (t,  $J$  = 7.6 Hz, 1H), 7.70 (d,  $J$  = 8.0 Hz, 1H), 7.25 – 7.18 (m, 1H), 7.04 – 6.98 (m, 2H), 3.87 (s, 3H).

$^{13}\text{C-NMR}$  ( $\text{CDCl}_3$ , 75 MHz): 160.4, 157.1, 149.5, 136.6, 132.0, 128.1 (2C), 121.3 (2C), 119.7, 114.1, 55.3.

Spectroscopic data were in accordance with literature data.<sup>4</sup>

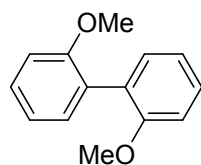

**5a**

### 2,2'-Dimethoxybiphenyl (5a).

GC:  $t_R$  = 5.316 min.

Purification: Chromatography; Eluent: Petroleum ether/Ethyl acetate 15:1.

$^1\text{H-NMR}$  ( $\text{CDCl}_3$ , 300 MHz): 7.27 – 7.15 (m, 4H), 6.95 – 6.88 (m, 4H), 3.69 (s, 6H).

$^{13}\text{C-NMR}$  ( $\text{CDCl}_3$ , 75 MHz): 156.2 (2C), 130.6 (2C), 127.7 (2C), 127.0 (2C), 119.5 (2C), 110.3 (2C), 54.8 (2C).

Spectroscopic data were in accordance with literature data.<sup>4</sup>

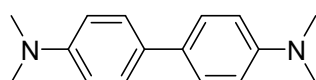

**6a**

**4,4'-di-*N,N*-Dimethylaminobiphenyl (6a).**

GC:  $t_R$  = 8.659 min.

Purification: Chromatography; Eluent: Petroleum ether/Ethyl acetate 15:1.

$^1\text{H-NMR}$  ( $\text{CDCl}_3$ , 300 MHz): 7.47 – 7.44 (m, 4H), 6.82 – 6.79 (m, 4H), 2.96 (s, 12H).

$^{13}\text{C-NMR}$  ( $\text{CDCl}_3$ , 75 MHz): 148.4 (2C), 129.1 (2C), 126.1 (4C), 112.3 (4C), 40.0 (4C).

Spectroscopic data were in accordance with literature data.<sup>6</sup>

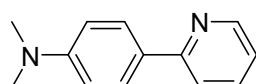

**6b**

***N,N*-Dimethyl-4-(pyridin-2-yl)aniline (6b).**

GC:  $t_R$  = 7.780 min.

Purification: Chromatography; Eluent: Petroleum ether/Ethyl acetate 15:1.

$^1\text{H-NMR}$  ( $\text{CDCl}_3$ , 300 MHz): 8.62 (d,  $J$  = 4.8 Hz, 1H), 7.98 – 7.90 (m, 2H), 7.67 (q,  $J$  = 7.9 Hz, 2H), 7.16 – 7.07 (m, 1H), 6.84 – 6.76 (m, 2H), 3.02 (s, 6H).

$^{13}\text{C-NMR}$  ( $\text{CDCl}_3$ , 75 MHz): 157.5, 151.3, 149.2, 136.9, 127.9 (2C), 127.8, 120.8, 119.4, 112.4 (2C), 40.5 (2C).

Spectroscopic data were in accordance with literature data.<sup>9</sup>

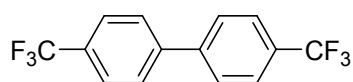

**7a**

**4,4'-Bis(trifluoromethyl)-1,1'-biphenyl (7a).**

GC:  $t_R$  = 4.123 min.

Purification: Chromatography; Eluent: Petroleum ether/Ethyl acetate 15:1.

$^1\text{H-NMR}$  ( $\text{CDCl}_3$ , 300 MHz): 7.75 – 7.69 (m, 8H).



$^{13}\text{C}$ -NMR ( $\text{CDCl}_3$ , 75 MHz): 143.4 (2C), 127.8 (8C), 126.1 (2C), 126.0 (2C).

$^{19}\text{F}$ -NMR ( $\text{CDCl}_3$ , 282 MHz): -62.6.

Spectroscopic data were in accordance with literature data.<sup>6</sup>

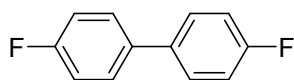

**8a**

#### **4,4'-Difluorobiphenyl (8a).**

GC:  $t_R$  = 4.083 min.

Purification: Chromatography; Eluent: Petroleum ether/Ethyl acetate 15:1.

$^1\text{H}$ -NMR ( $\text{CDCl}_3$ , 300 MHz): 7.50 – 7.44 (m, 4H), 7.14 – 7.05 (m, 4H).

$^{13}\text{C}$ -NMR ( $\text{CDCl}_3$ , 75 MHz): 161.6 (d,  $J_{\text{C-F}}$  = 246.5 Hz, 2C), 135.6 (2C), 127.7 (d,  $J_{\text{C-F}}$  = 8.0 Hz, 4C), 114.8 (d,  $J_{\text{C-F}}$  = 21.5 Hz, 4C).

$^{19}\text{F}$ -NMR ( $\text{CDCl}_3$ , 282 MHz): -116.8.

Spectroscopic data were in accordance with literature data.<sup>2</sup>

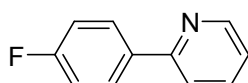

**8b**

#### **2-(4-Fluorophenyl)pyridine (8b).**

GC:  $t_R$  = 4.522 min.

Purification: Chromatography; Eluent: Petroleum ether/Ethyl acetate 15:1.

$^1\text{H}$ -NMR ( $\text{CDCl}_3$ , 300 MHz): 8.69 (ddd,  $J$  = 4.9, 1.7, 0.9 Hz, 1H), 8.02 – 7.95 (m, 2H), 7.81 – 7.74 (m, 1H), 7.70 (dt,  $J$  = 8.0, 1.0 Hz, 1H), 7.27 – 7.23 (m, 1H), 7.20 – 7.12 (m, 2H).

$^{13}\text{C}$ -NMR ( $\text{CDCl}_3$ , 75 MHz): 165.0, 162.5, 156.4, 149.5, 137.4, 129.0, 128.9, 122.3, 120.6, 116.0, 115.8.

$^{19}\text{F}$ -NMR ( $\text{CDCl}_3$ , 282 MHz): -112.7.

Spectroscopic data were in accordance with literature data.<sup>10</sup>

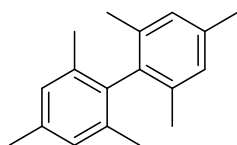

**9a**

**2,2',4,4',6,6'-Hexamethylbiphenyl (9a).**

GC:  $t_R$  = 5.248 min.

Purification: Chromatography; Eluent: Petroleum ether/Ethyl acetate 15:1.

$^1\text{H-NMR}$  ( $\text{CDCl}_3$ , 300 MHz): 6.92 (s, 4H), 2.31 (s, 6H), 1.84 (s, 12H).

$^{13}\text{C-NMR}$  ( $\text{CDCl}_3$ , 75 MHz): 136.2 (2C), 135.2 (2C), 134.7 (4C), 127.3 (4C), 20.3 (2C), 18.9 (4C).

Spectroscopic data were in accordance with literature data.<sup>7</sup>

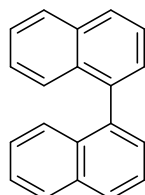

**10a**

**1,1'-Binaphthyl (10a).**

GC:  $t_R$  = 8.450 min.

Purification: Chromatography; Eluent: Petroleum ether/Ethyl acetate 15:1.

$^1\text{H-NMR}$  ( $\text{CDCl}_3$ , 300 MHz): 7.95 – 7.91 (m, 4H), 7.58 (dd,  $J$  = 8.2, 7.0 Hz, 2H), 7.49 – 7.43 (m, 4H), 7.38 (d,  $J$  = 8.0 Hz, 2H), 7.30 – 7.24 (m, 2H).

$^{13}\text{C-NMR}$  ( $\text{CDCl}_3$ , 75 MHz): 137.6 (2C), 132.7 (2C), 132.0 (2C), 127.3 (2C), 127.0 (2C), 127.0 (2C), 125.7 (2C), 125.1 (2C), 125.0 (2C), 124.5 (2C).

Spectroscopic data were in accordance with literature data.<sup>2</sup>

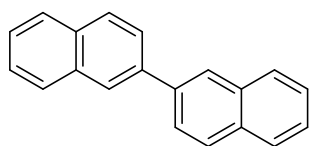

**11a**

**2,2'-binaphthyl (11a).**

GC:  $t_R$  = 11.611 min.

Purification: Chromatography; Eluent: Petroleum ether/Ethyl acetate 15:1.

$^1\text{H-NMR}$  ( $\text{CDCl}_3$ , 300 MHz): 8.16 (s, 2H), 7.96 – 7.85 (m, 8H), 7.55 – 7.45 (m, 4H).

$^{13}\text{C-NMR}$  ( $\text{CDCl}_3$ , 75 MHz): 137.6 (2C), 132.9 (2C), 131.9 (2C), 127.7 (2C), 127.4 (2C), 126.8 (2C), 125.5 (2C), 125.3 (2C), 125.2 (2C), 124.9 (2C).

Spectroscopic data were in accordance with literature data.<sup>5</sup>

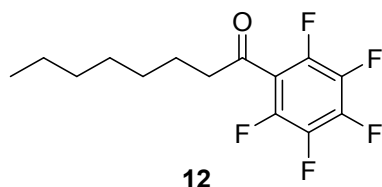

### 1-(Pentafluorophenyl)-octan-1-one (12).

Bp: 109 °C/0.11 Torr.

GC:  $t_R$  = 4.514 min.

Purification: Chromatography; Eluent: Petroleum ether/Dichloromethane 90:10, then Kugelrohr distillation: 100 °C/10<sup>-2</sup> Torr.

$^1\text{H-NMR}$  ( $\text{CDCl}_3$ , 300 MHz): 2.83 (t,  $J$  = 7.3 Hz, 2H), 1.73 – 1.63 (m, 2H), 1.34 – 1.26 (m, 8H), 0.86 (t,  $J$  = 6.8 Hz, 3H).

$^{13}\text{C-NMR}$  ( $\text{CDCl}_3$ , 75 MHz): 193.5 (1C), 144.0 (dm,  $J_{\text{C-F}}$  = 253.0 Hz, 2C), 142.5 (dm,  $J_{\text{C-F}}$  = 258.4 Hz, 1C), 137.6 (dm,  $J_{\text{C-F}}$  = 251.7 Hz, 2C), 114.5 (t,  $J_{\text{C-F}}$  = 18.8 Hz, 1C), 44.3, 30.7, 28.1, 27.1, 22.7, 21.7, 13.1.

$^{19}\text{F-NMR}$  ( $\text{CDCl}_3$ , 282 MHz): -142.4 (d,  $J$  = 16.5 Hz, 2F), -151.1 (t,  $J$  = 20.7 Hz, 1F), -161.1 (m, 2F).

Spectroscopic data were in accordance with literature data.<sup>8</sup>

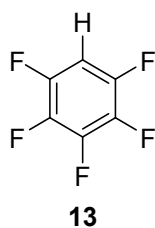

### Pentafluorobenzene (13).

GC:  $t_R$  = 0.338 min.

$^1\text{H-NMR}$  ( $\text{CDCl}_3$ , 300 MHz): 6.95 – 6.83 (m, 1H).

$^{13}\text{C-NMR}$  ( $\text{CDCl}_3$ , 75 MHz): 145.4 (dm,  $J_{\text{C-F}}$  = 248.8 Hz, 2C), 141.1 (dm,  $J_{\text{C-F}}$  = 254.1 Hz, 1C), 136.8 (dm,  $J_{\text{C-F}}$  = 251.5 Hz, 2C), 99.9 (td,  $J_{\text{C-F}}$  = 22.9, 3.1 Hz, 1C).

$^{19}\text{F}$ -NMR ( $\text{CDCl}_3$ , 282 MHz): -139.4 – -139.6 (m, 2F), -154.4 – -154.5 (m, 1F), -162.8 – -163.0 (m, 2F).

Spectroscopic data were in accordance with literature data.<sup>11</sup>

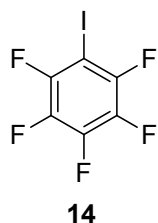

#### Iodopentafluorobenzene (14).

GC:  $t_R$  = 2.045 min.

$^{13}\text{C}$ -NMR ( $\text{CDCl}_3$ , 75 MHz): 146.4 (dm,  $J_{(\text{C-F})}$  = 239.5 Hz, 2C), 140.8 (dm,  $J_{(\text{C-F})}$  = 255.6 Hz, 1C), 136.3 (dm,  $J_{(\text{C-F})}$  = 257.5 Hz, 2C), 65.1 (t,  $J_{(\text{C-F})}$  = 28.4 Hz, 1C).

$^{19}\text{F}$ -NMR ( $\text{CDCl}_3$ , 282 MHz): -120.0 (d,  $J$  = 21.1 Hz, 2F), -153.0 (t,  $J$  = 20.0 Hz, 1F), -160.2 (m, 2F).

Spectroscopic data were in accordance with literature data.<sup>12</sup>

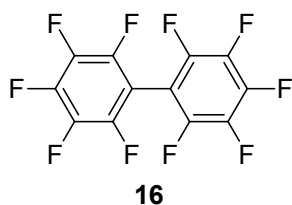

#### Decafluorobiphenyl (15).

GC:  $t_R$  = 2.733 min.

$^{13}\text{C}$ -NMR ( $\text{CDCl}_3$ , 75 MHz): 143.8 (dm,  $J_{(\text{C-F})}$  = 247.2 Hz, 4C), 141.8 (dm,  $J_{(\text{C-F})}$  = 258.1 Hz, 2C), 137.2 (dm,  $J_{(\text{C-F})}$  = 253.9 Hz, 4C), 100.7 (2C).

$^{19}\text{F}$ -NMR ( $\text{CDCl}_3$ , 282 MHz): -138.3 – -138.9 (m, 4F), -150.8 – -151.2 (m, 2F), -161.3 – -161.8 (m, 4F).

Spectroscopic data were in accordance with literature data.<sup>13</sup>

## 4. $^1\text{H}$ , $^{13}\text{C}$ and $^{19}\text{F}$ NMR Spectra

$^1\text{H}$ -NMR spectrum: **Biphenyl (1a)**

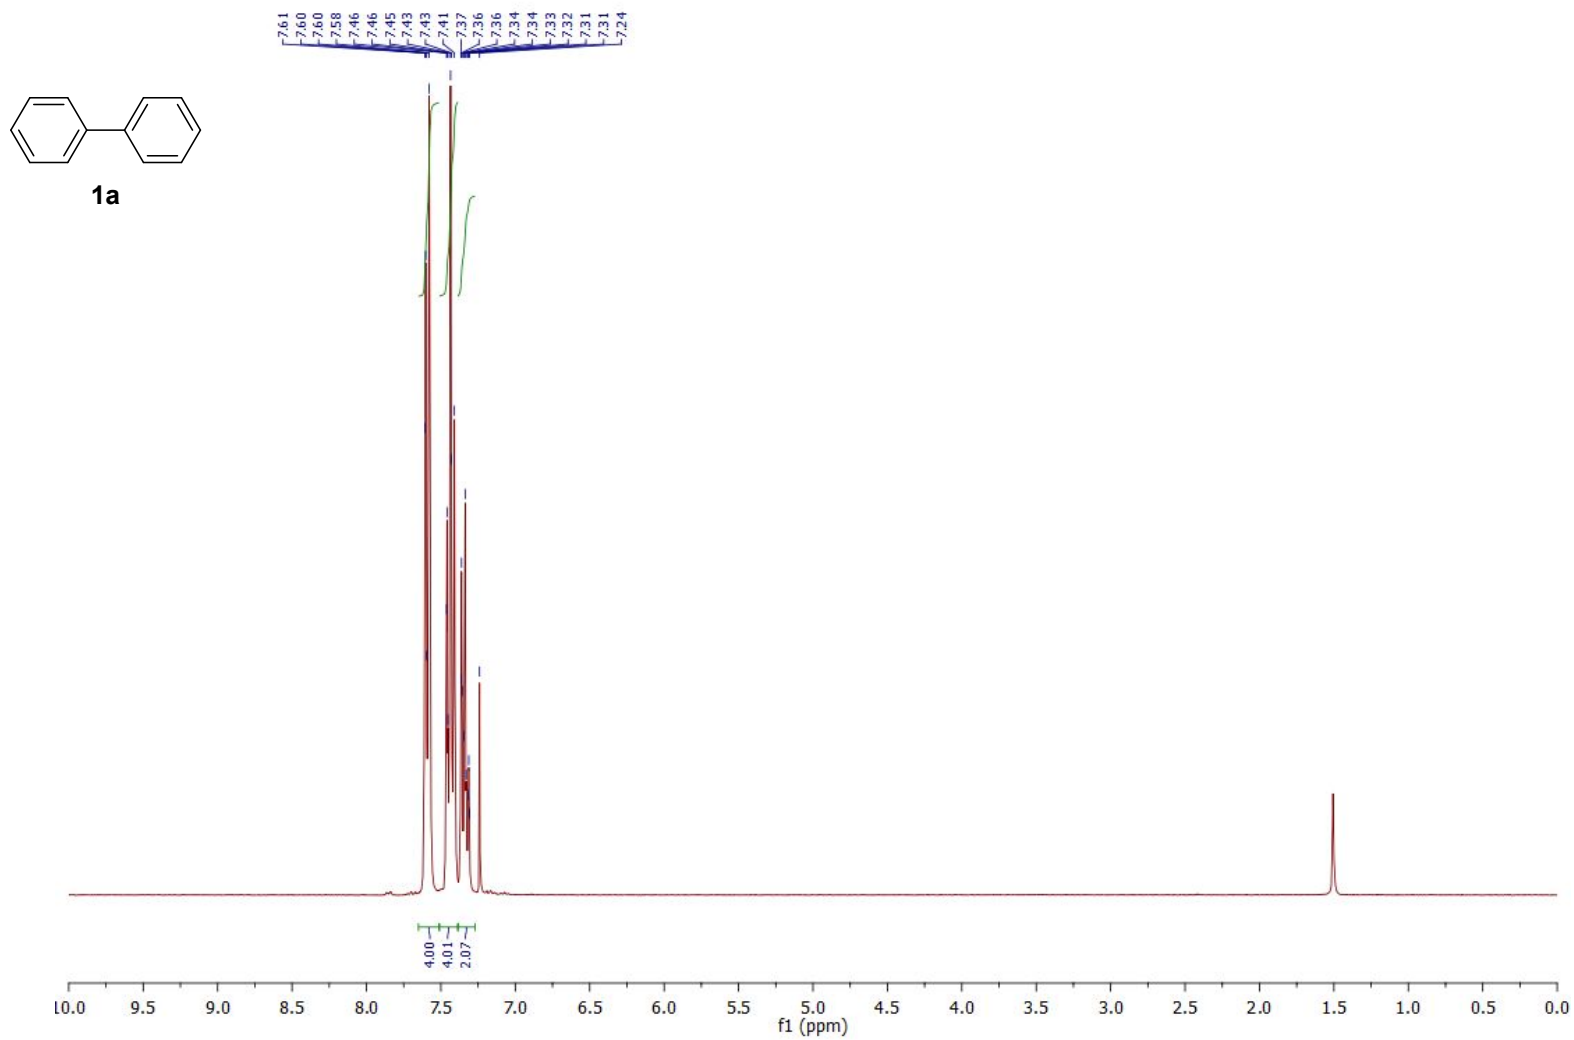

<sup>13</sup>C-NMR spectrum: **Biphenyl (1a)**

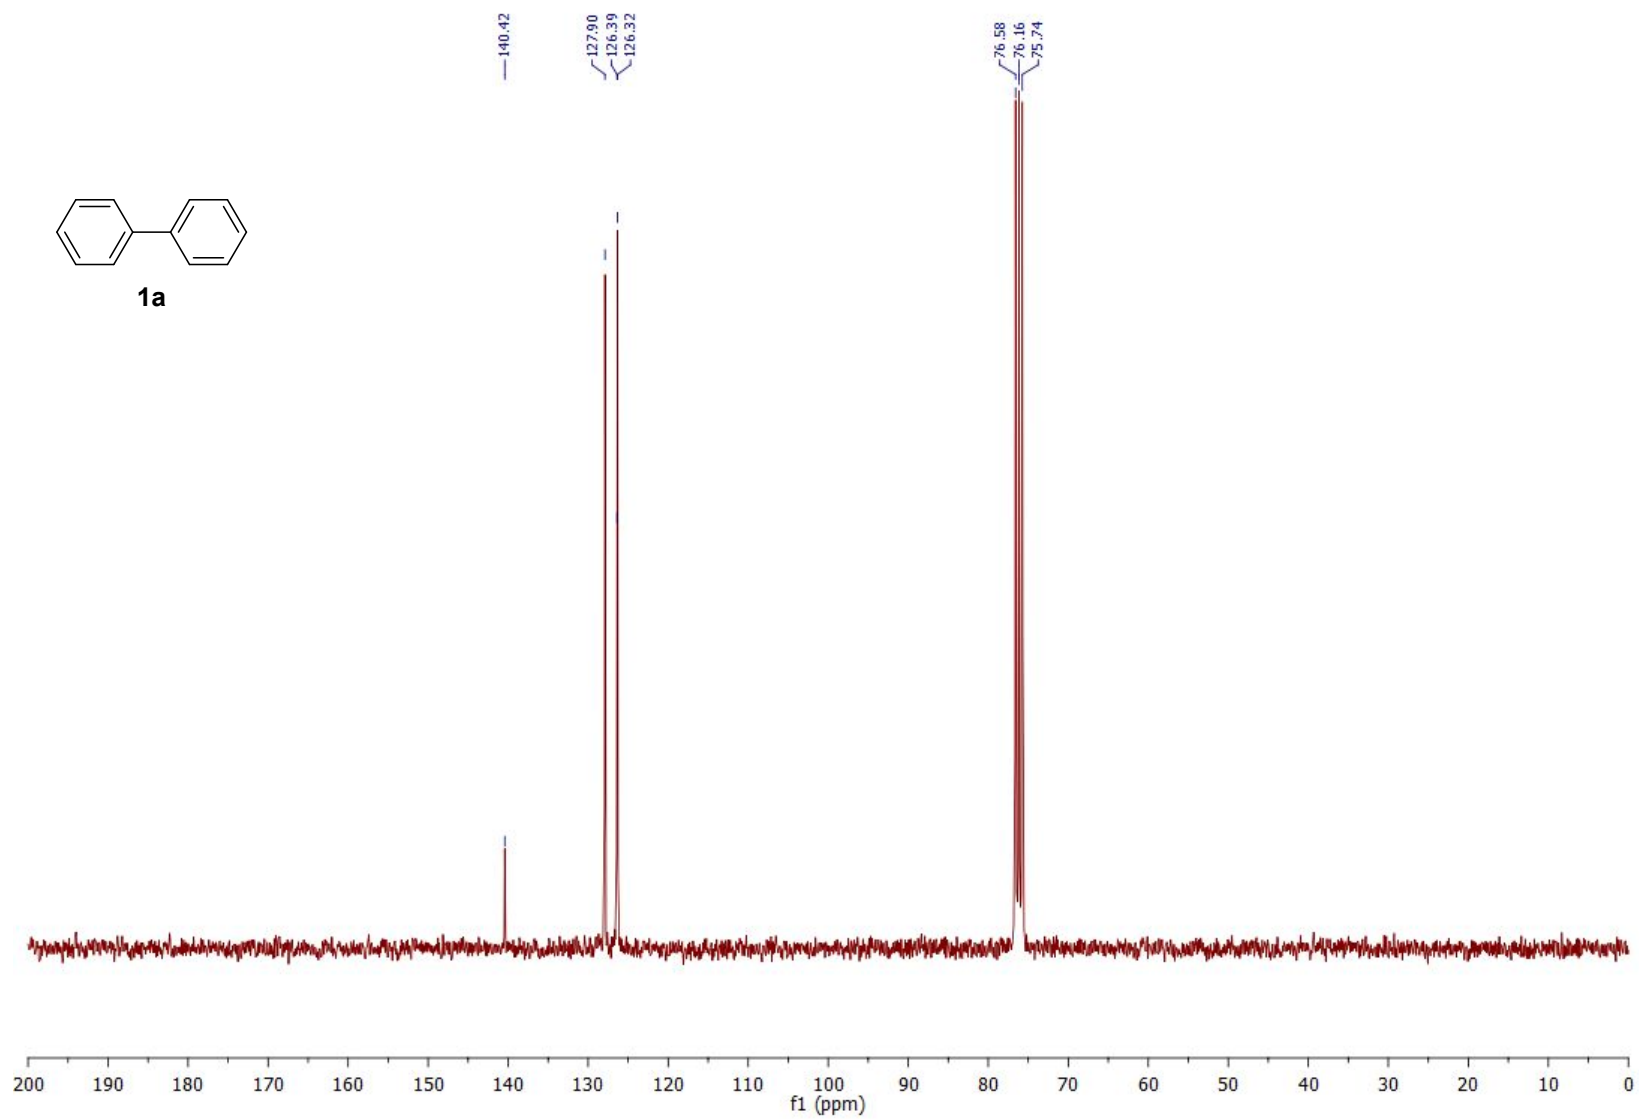

<sup>1</sup>H-NMR spectrum: **2-Phenylpyridine (1b)**

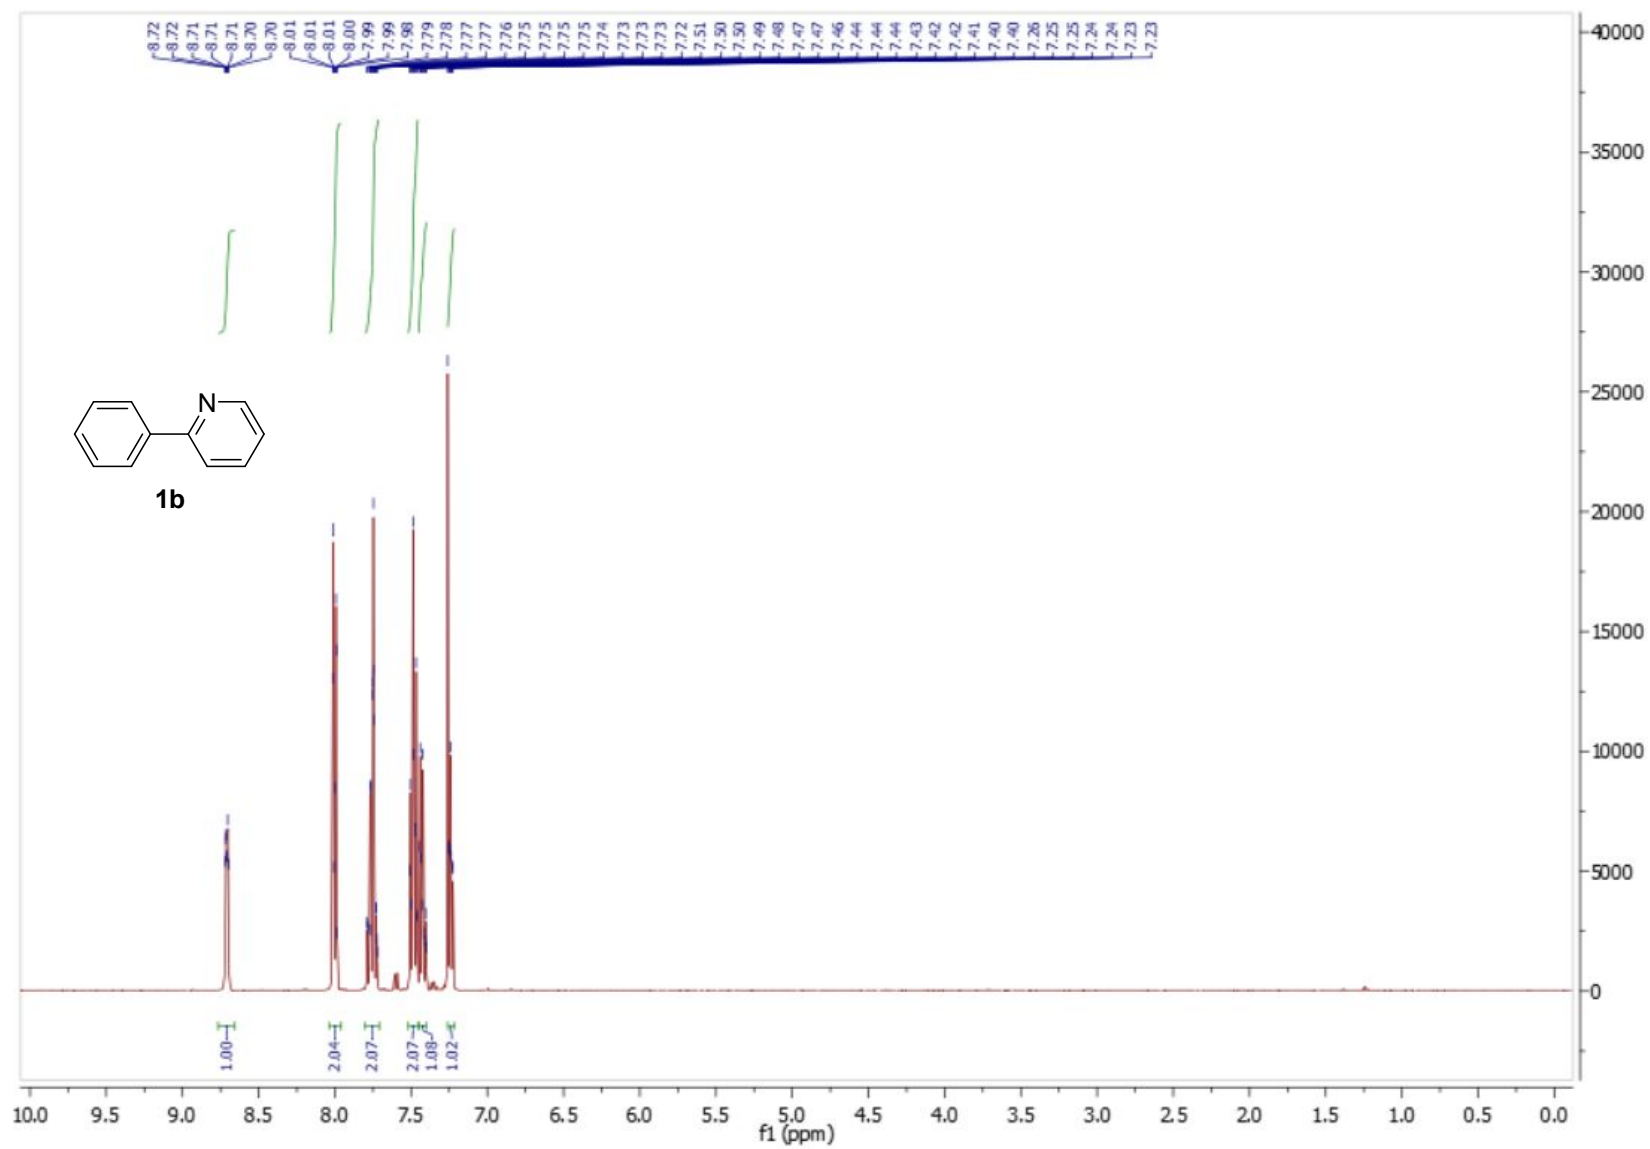

<sup>13</sup>C-NMR spectrum: **2-Phenylpyridine (1b)**

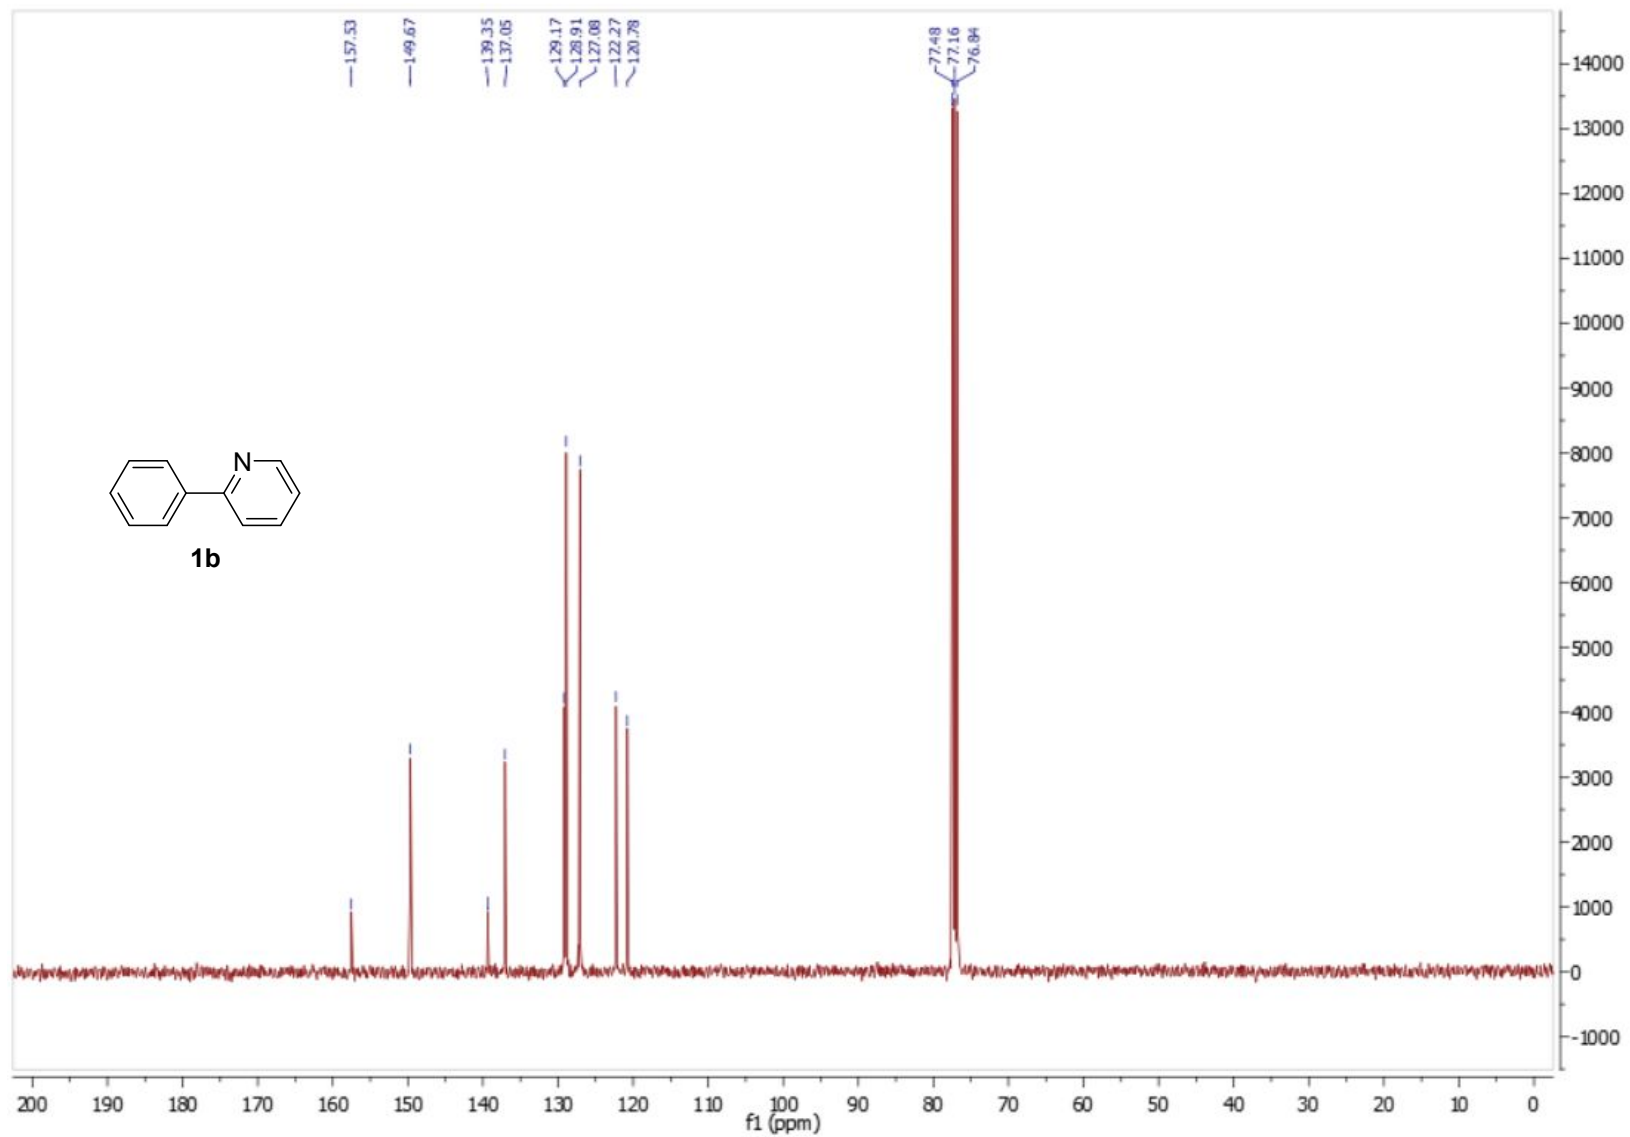



<sup>1</sup>H-NMR spectrum: **4,4'-Dimethylbiphenyl (2a)**

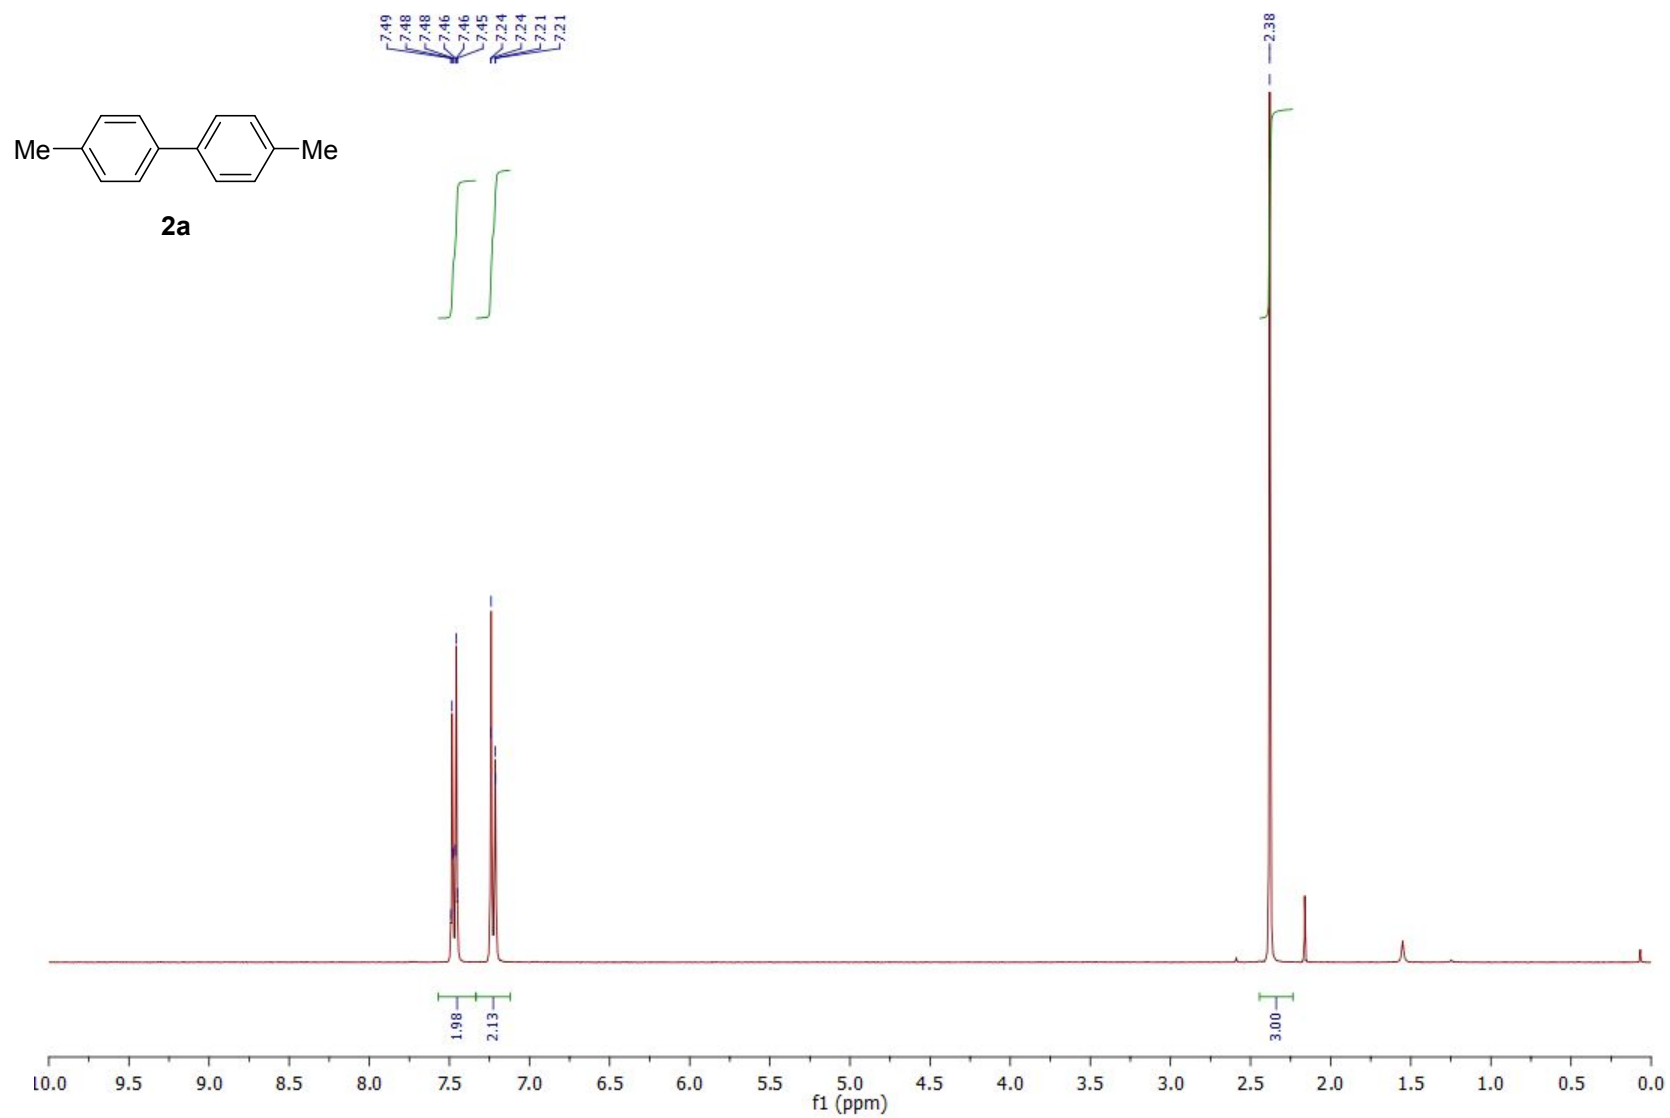

<sup>13</sup>C-NMR spectrum: **4,4'-Dimethylbiphenyl (2a)**

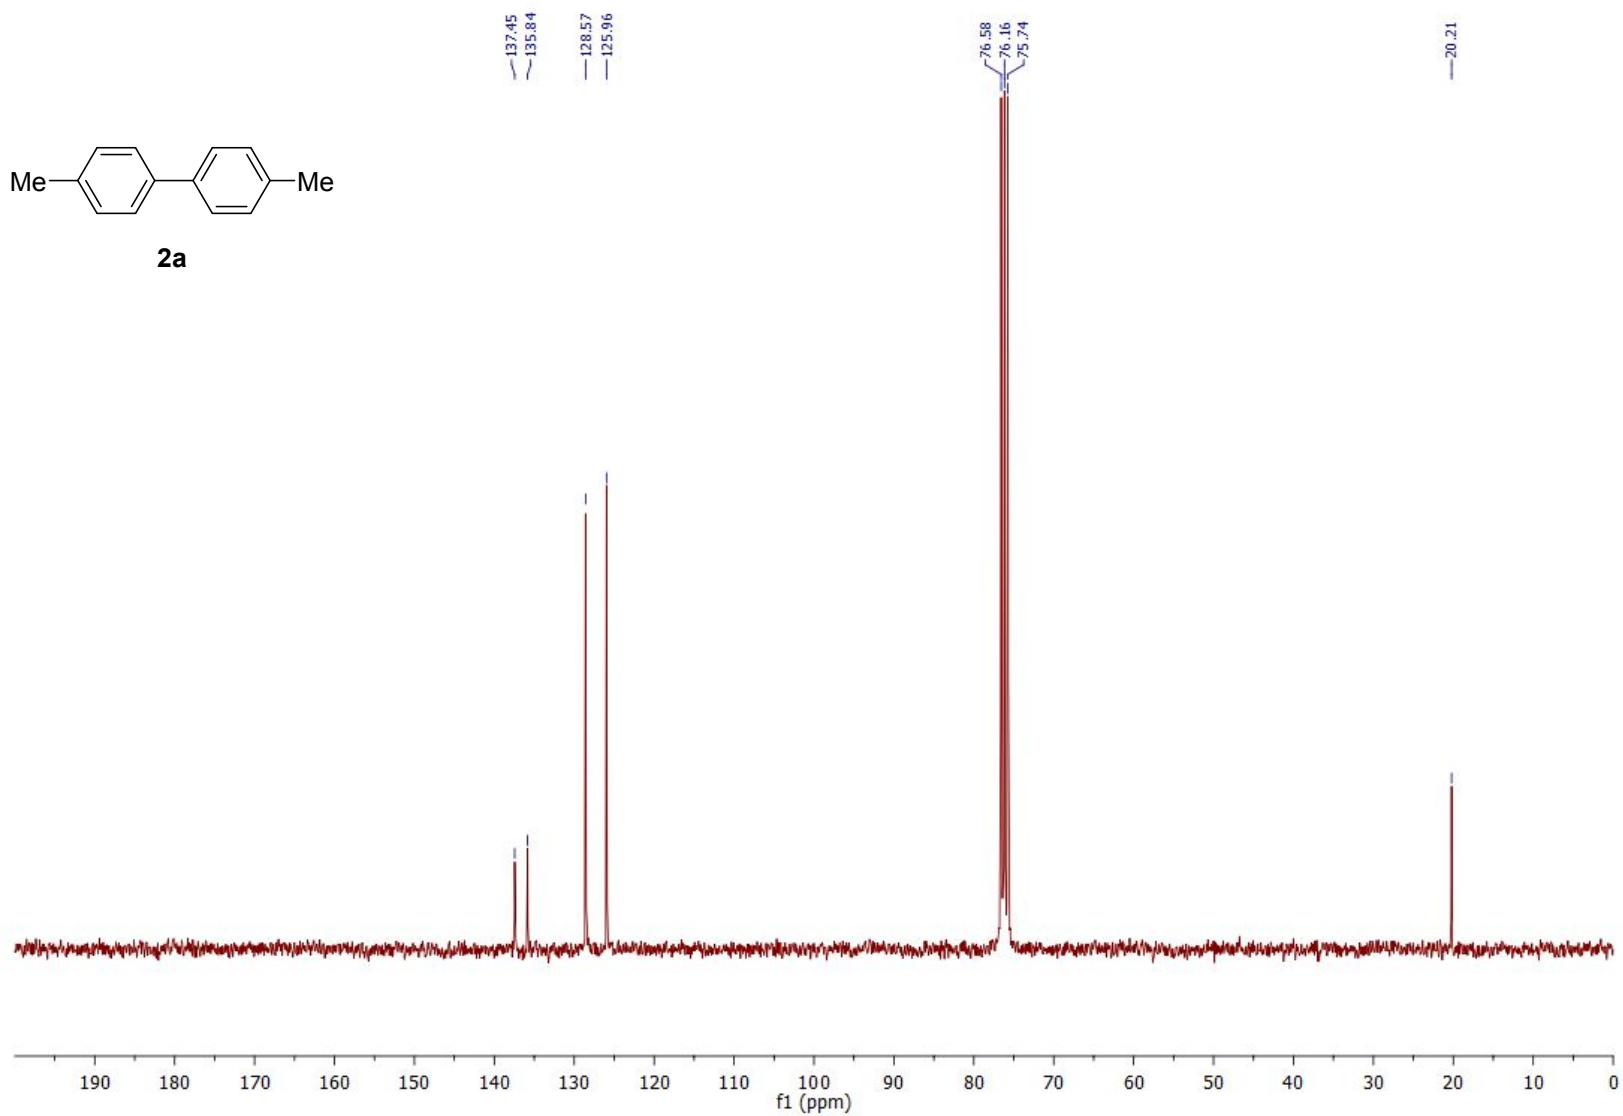

<sup>1</sup>H-NMR spectrum: **2-(p-Tolyl)pyridine (2b)**

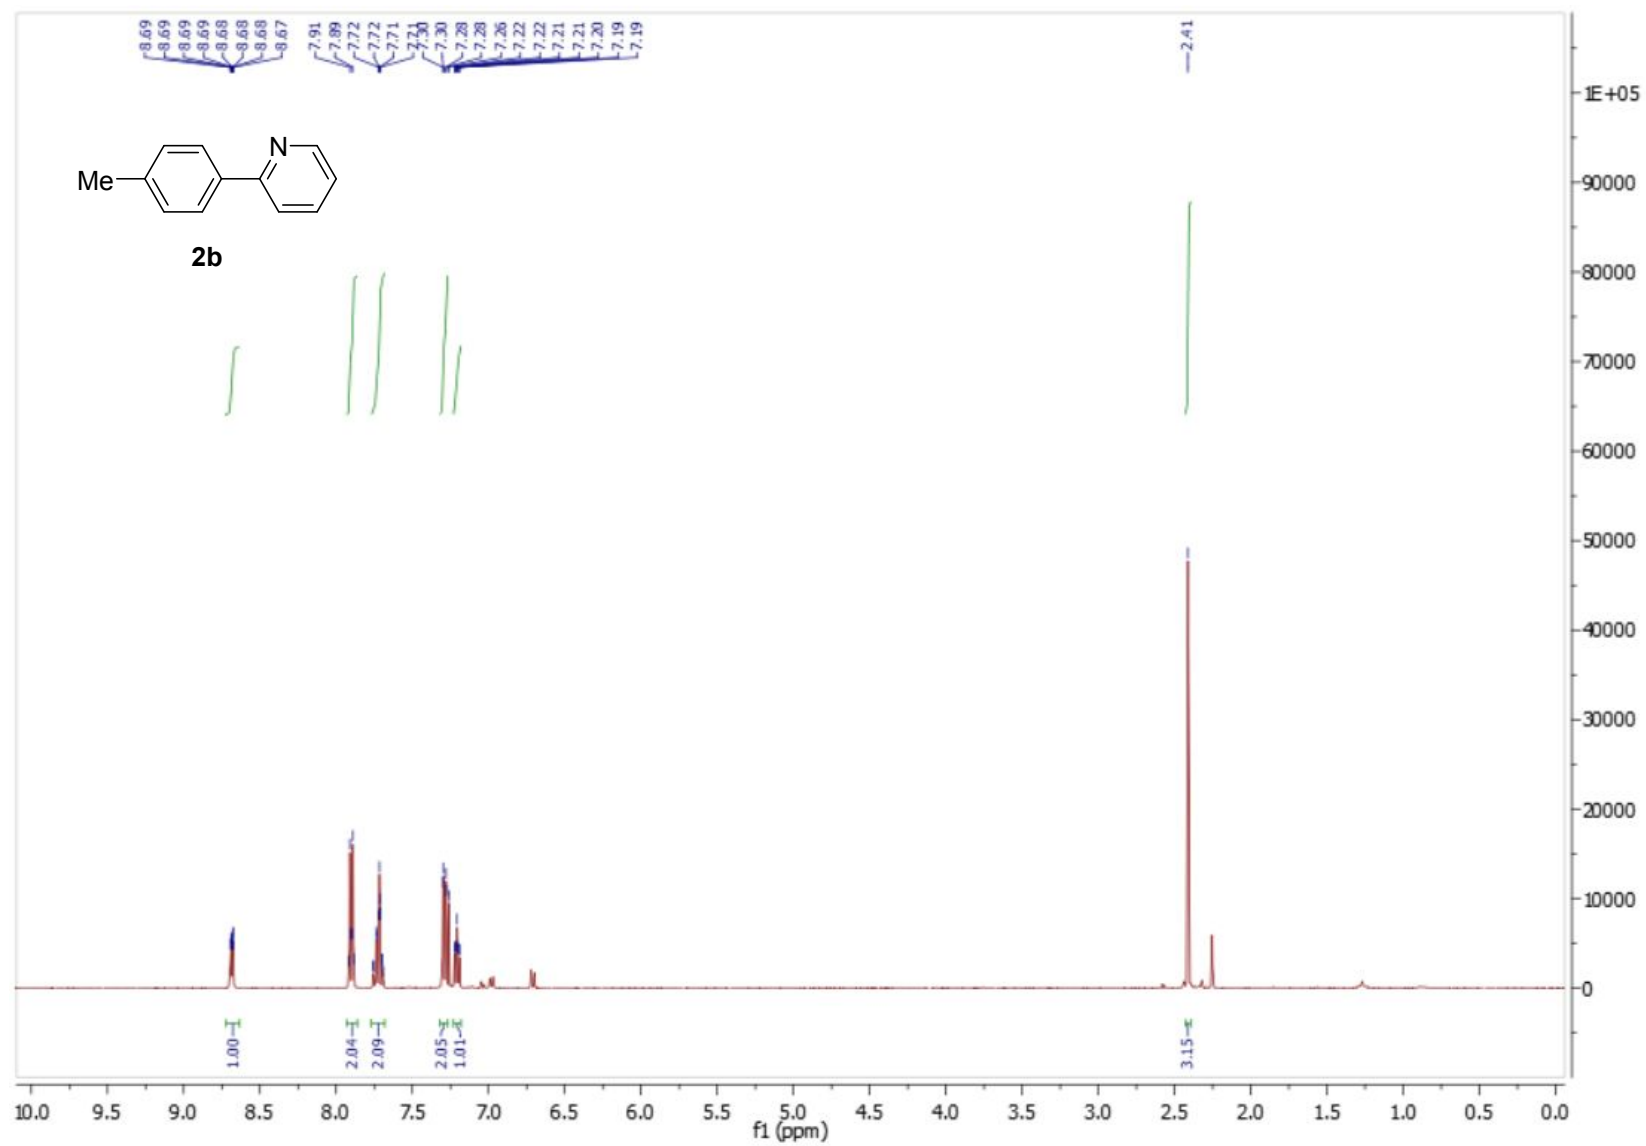

<sup>13</sup>C-NMR spectrum: **2-(p-Tolyl)pyridine (2b)**

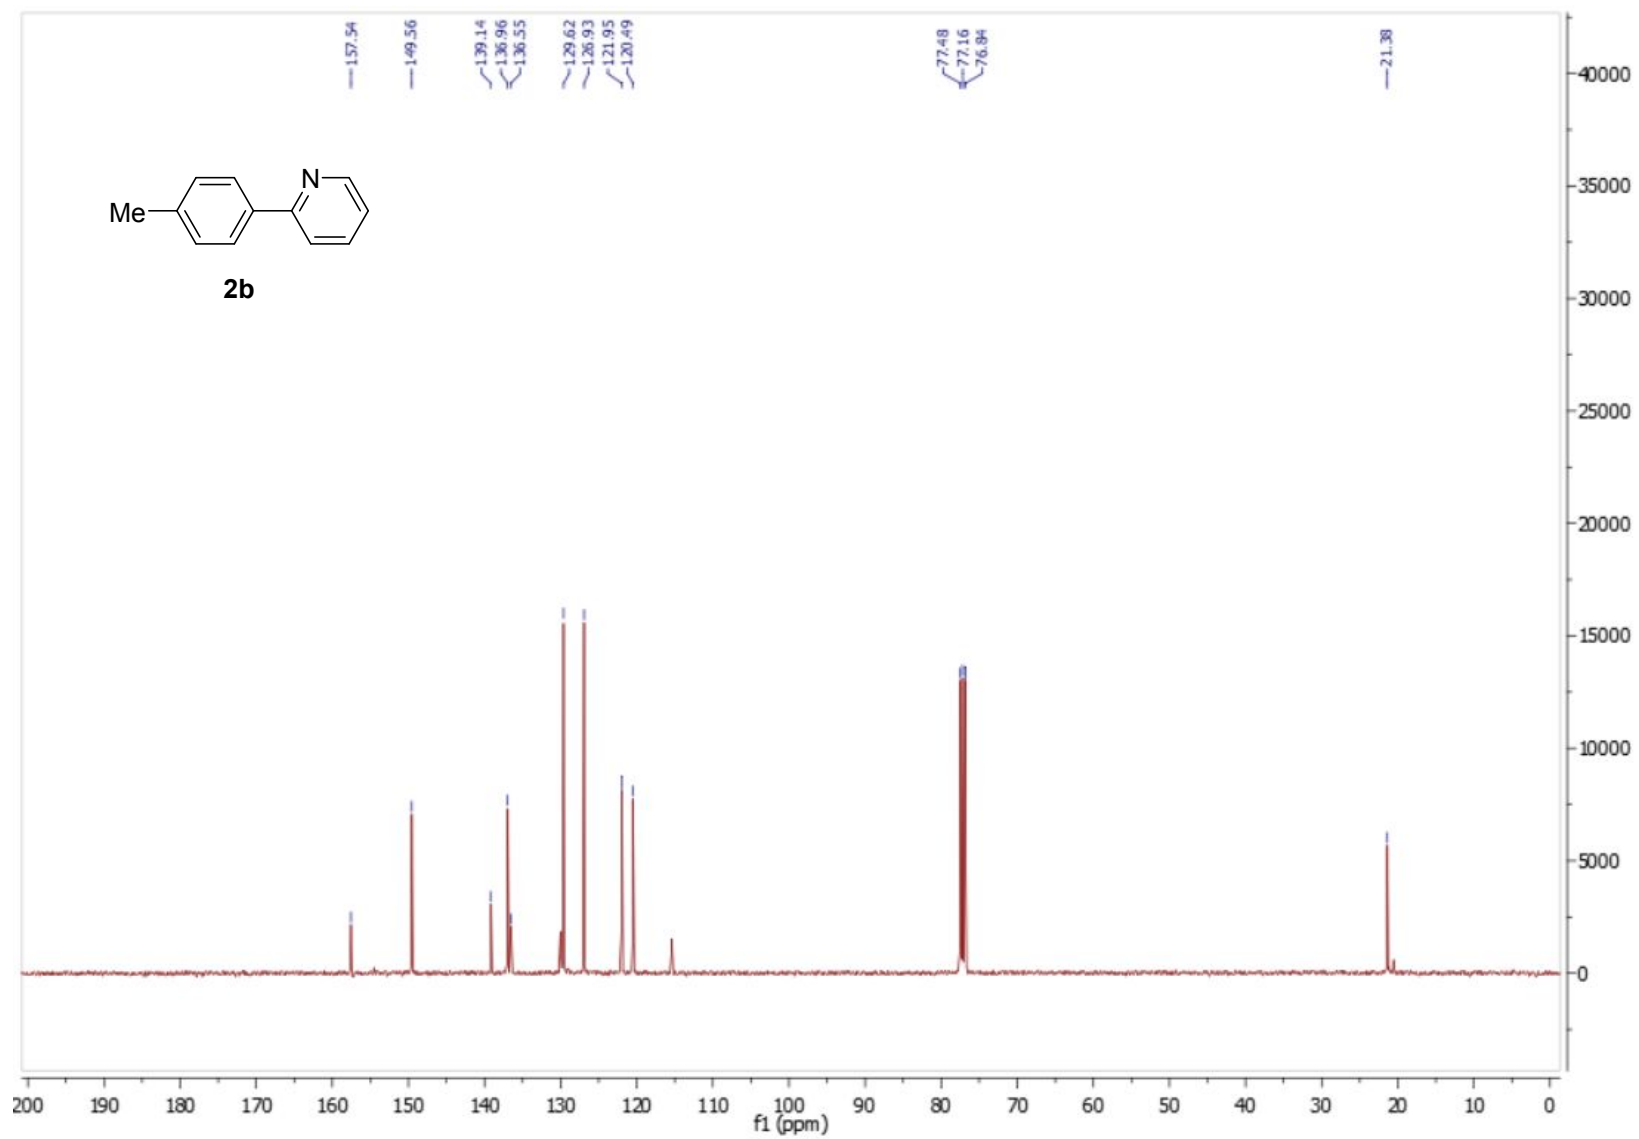

<sup>1</sup>H-NMR spectrum: **3,3'-Dimethyl-1,1'-biphenyl (3a)**

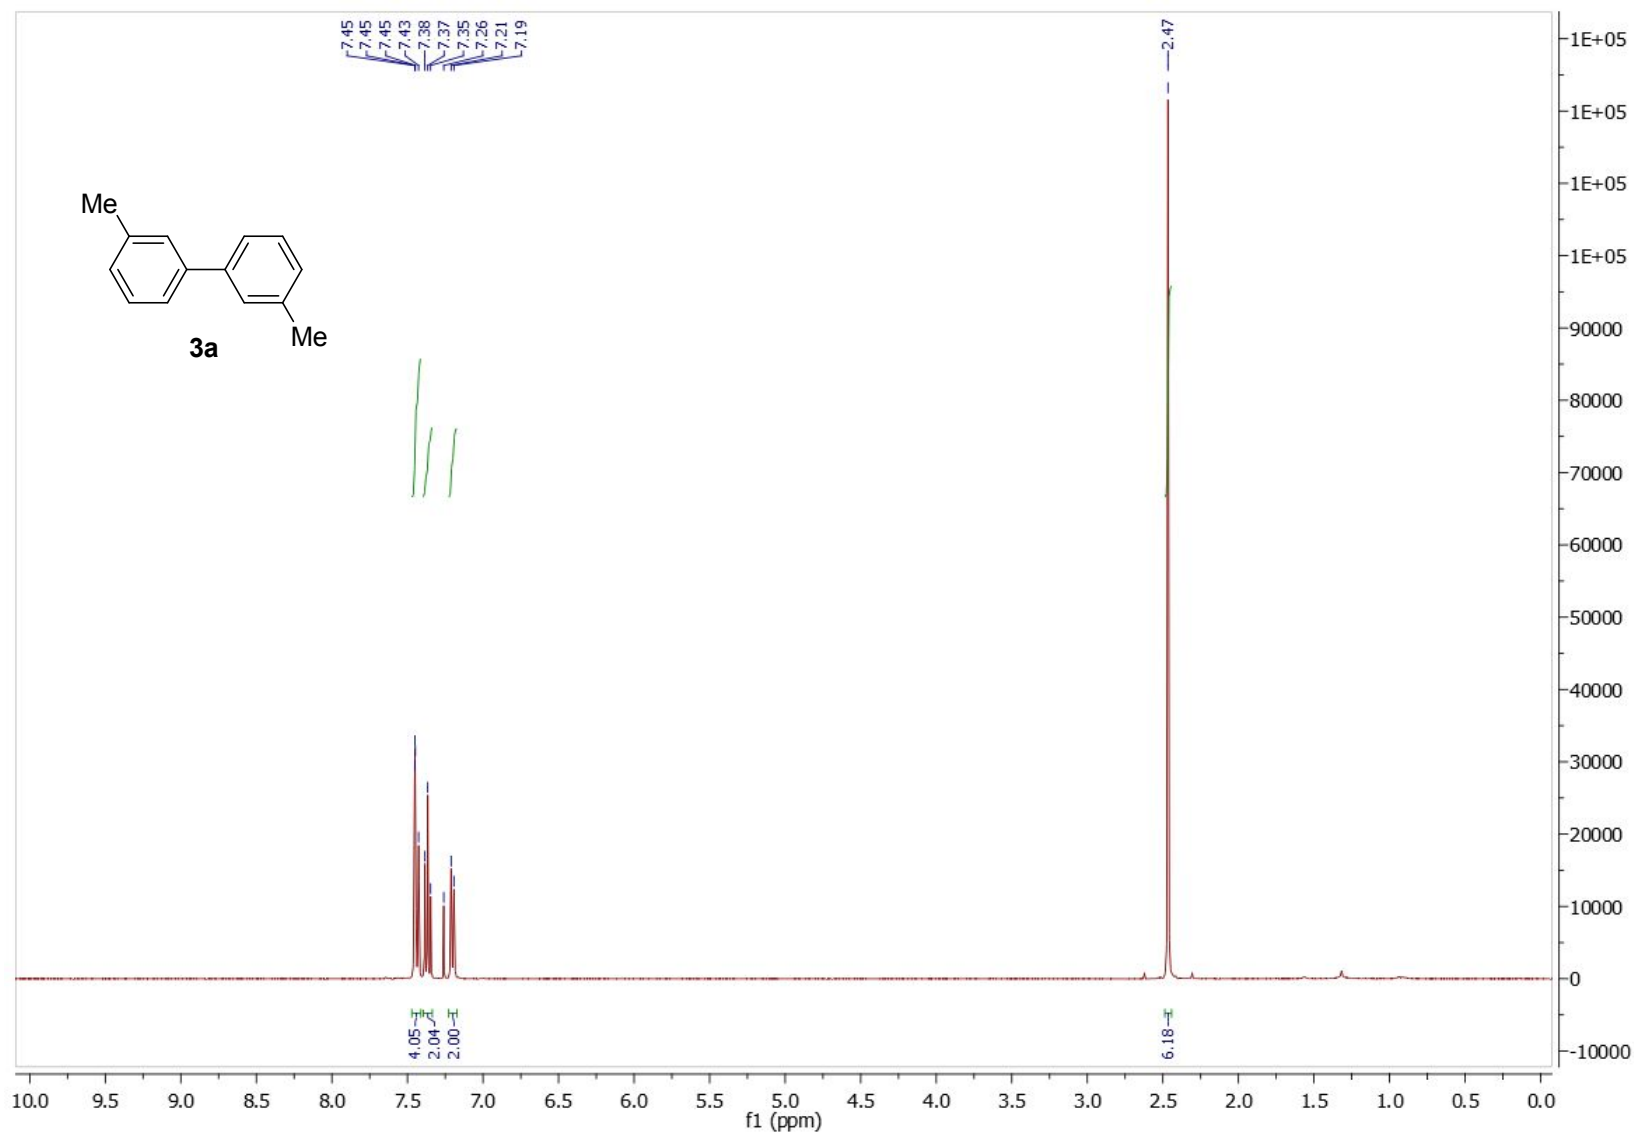

<sup>13</sup>C-NMR spectrum: **3,3'-Dimethyl-1,1'-biphenyl (3a)**

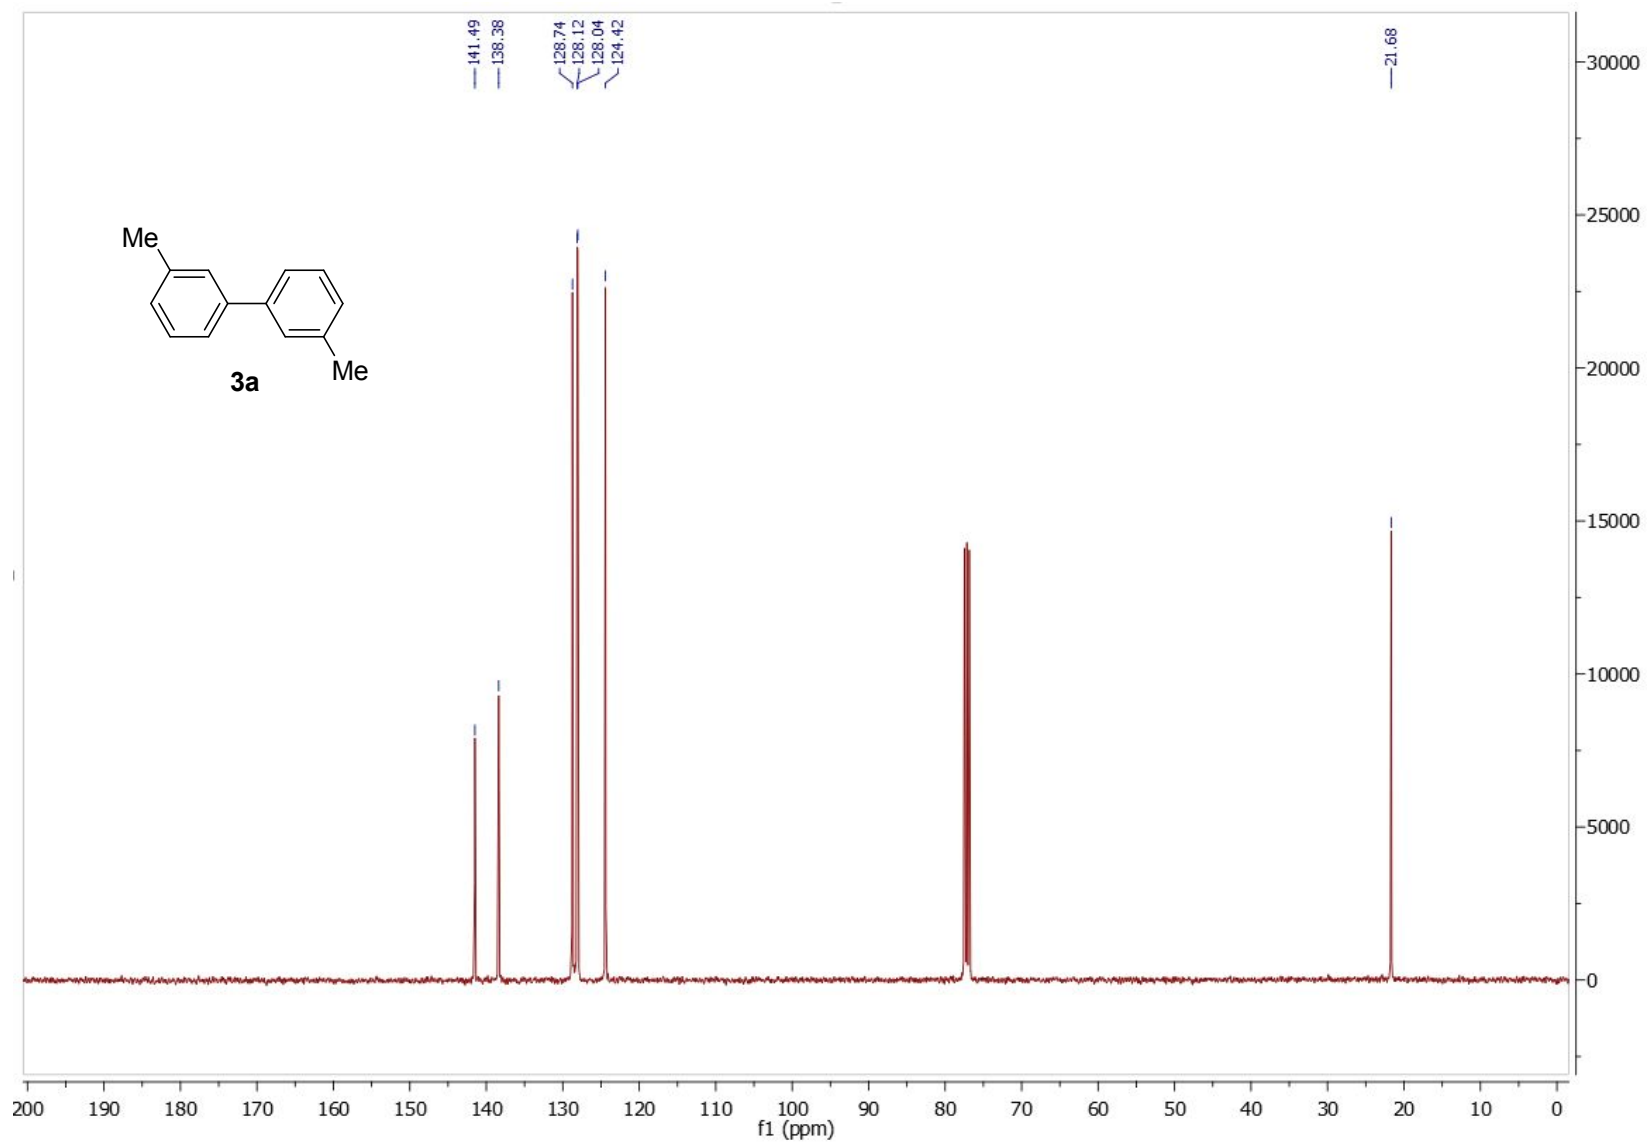

<sup>1</sup>H-NMR spectrum: 2-(*m*-Tolyl)pyridine (**3b**)

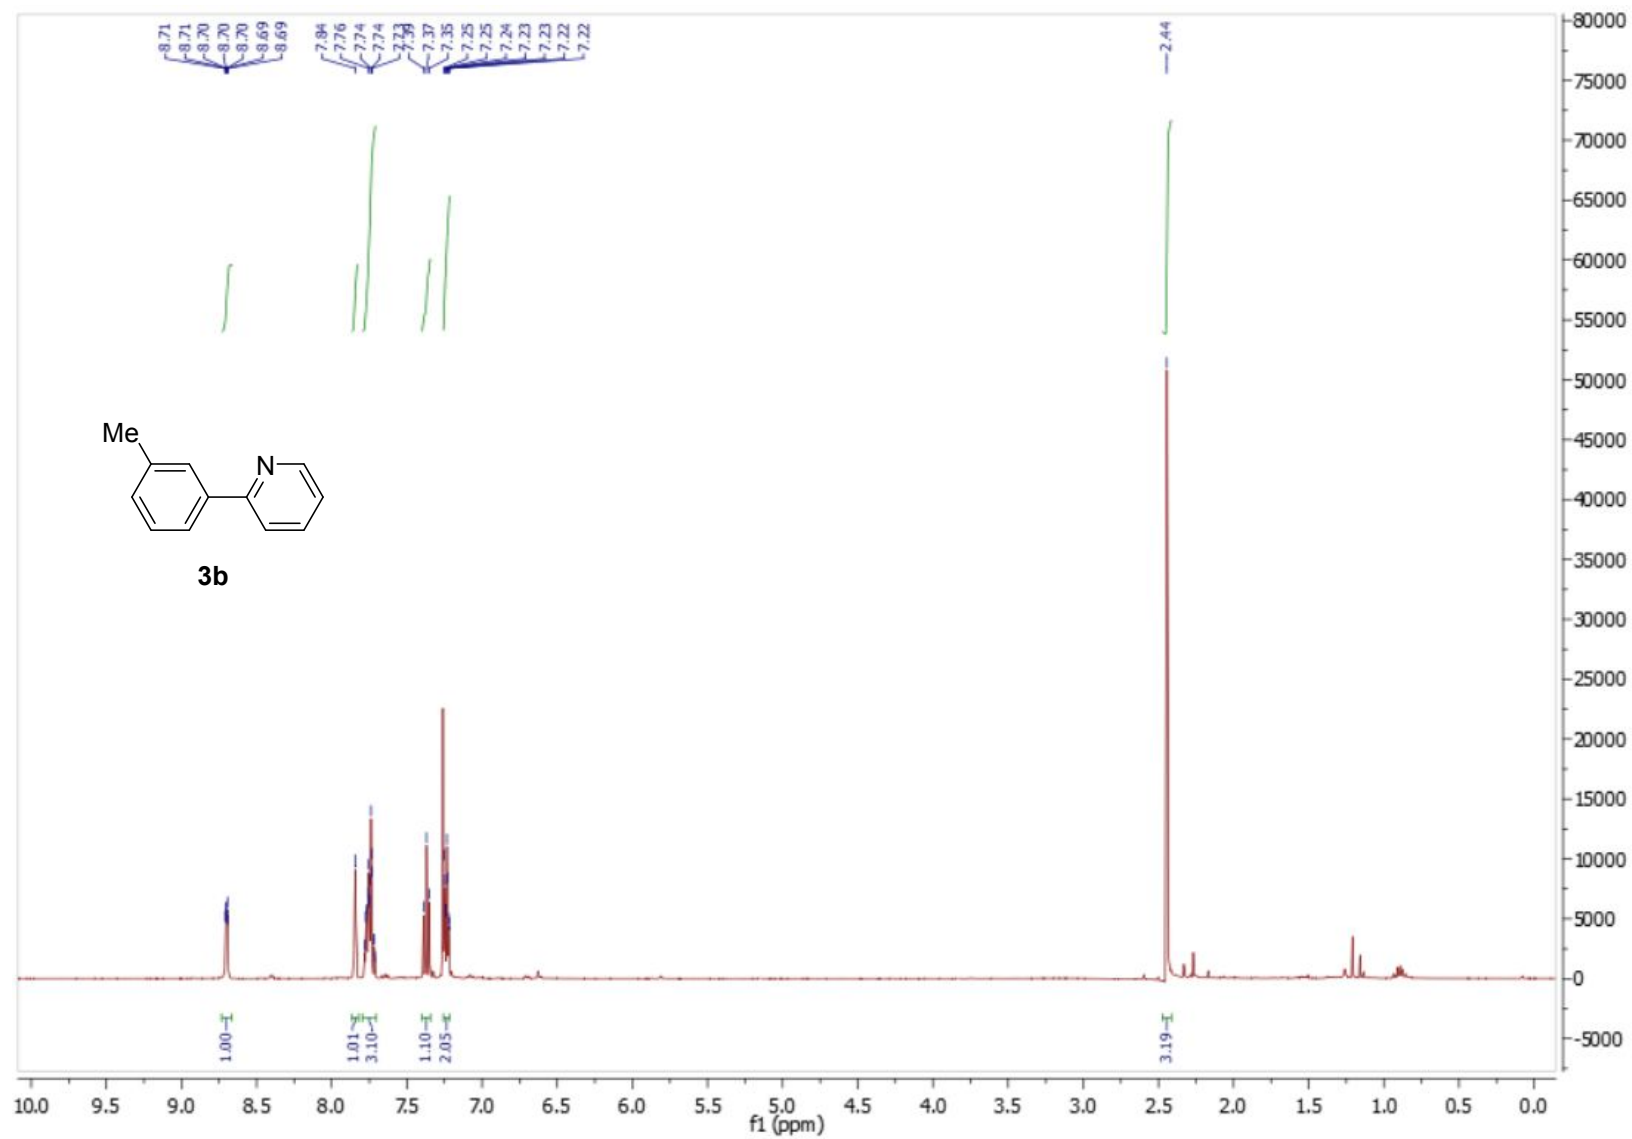

<sup>13</sup>C-NMR spectrum: **2-(*m*-Tolyl)pyridine (3b)**

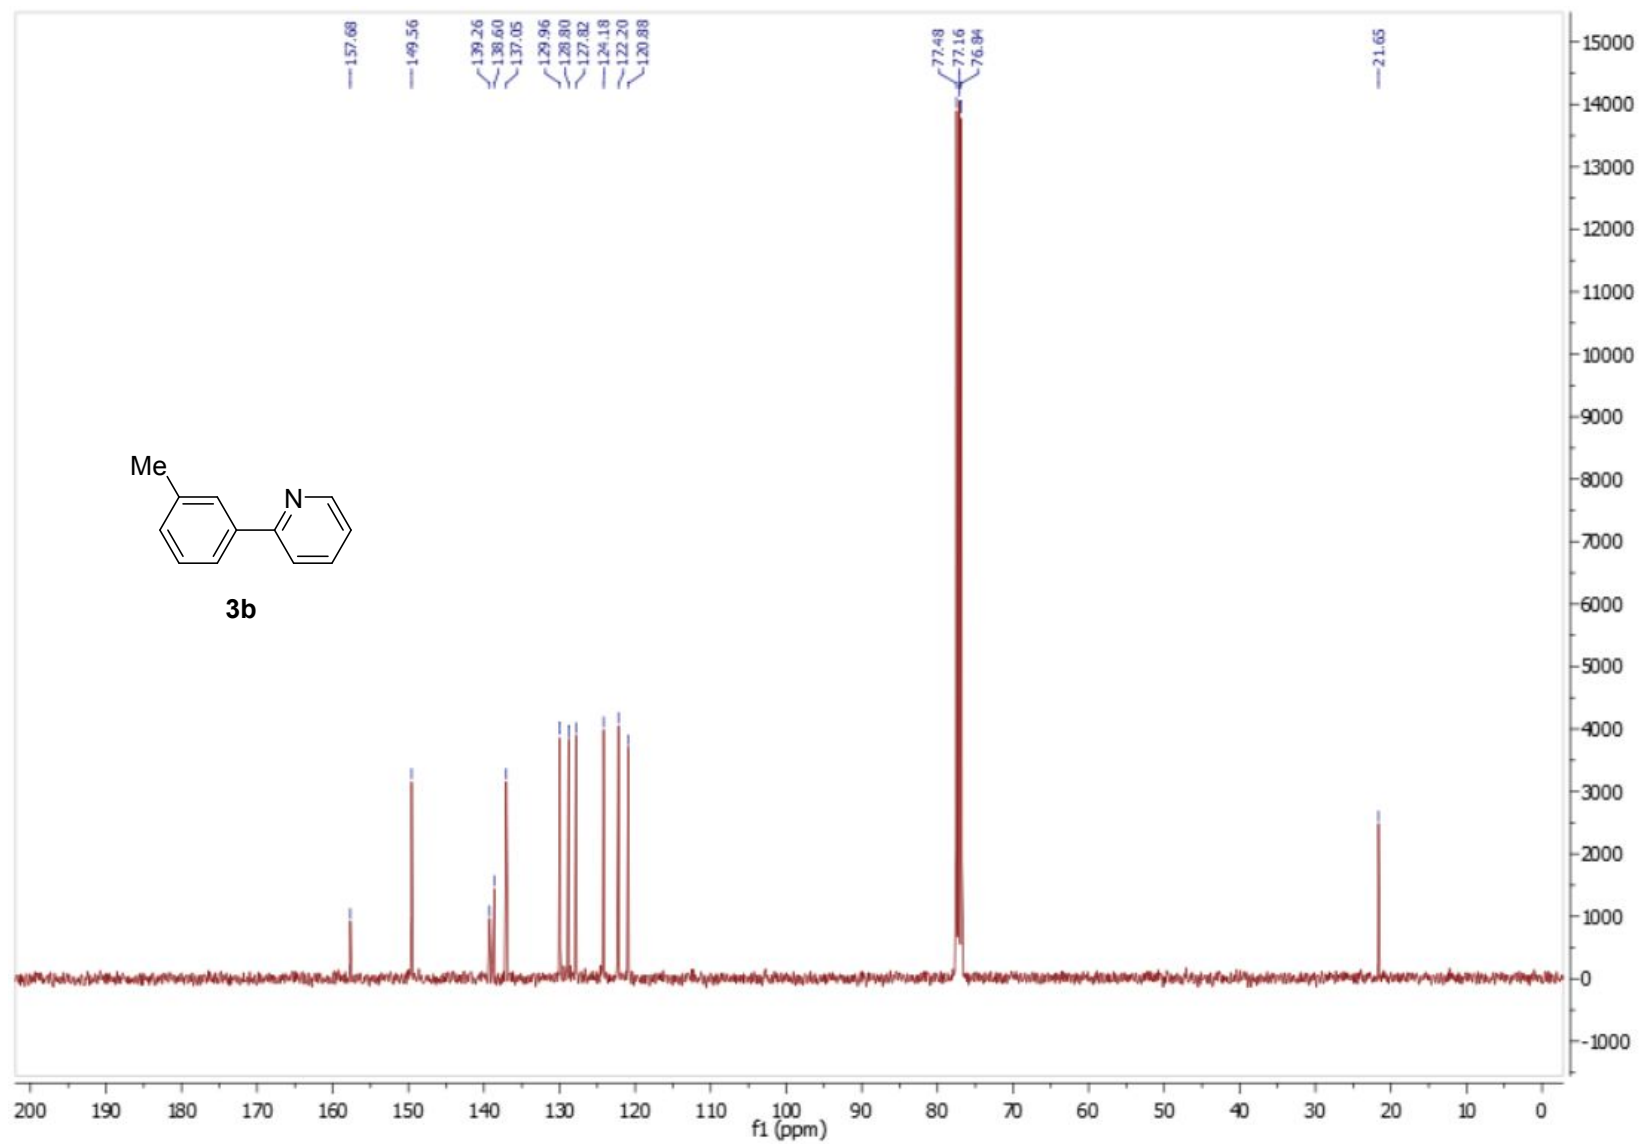



<sup>1</sup>H-NMR spectrum: **4,4'-Dimethoxybiphenyl (4a)**

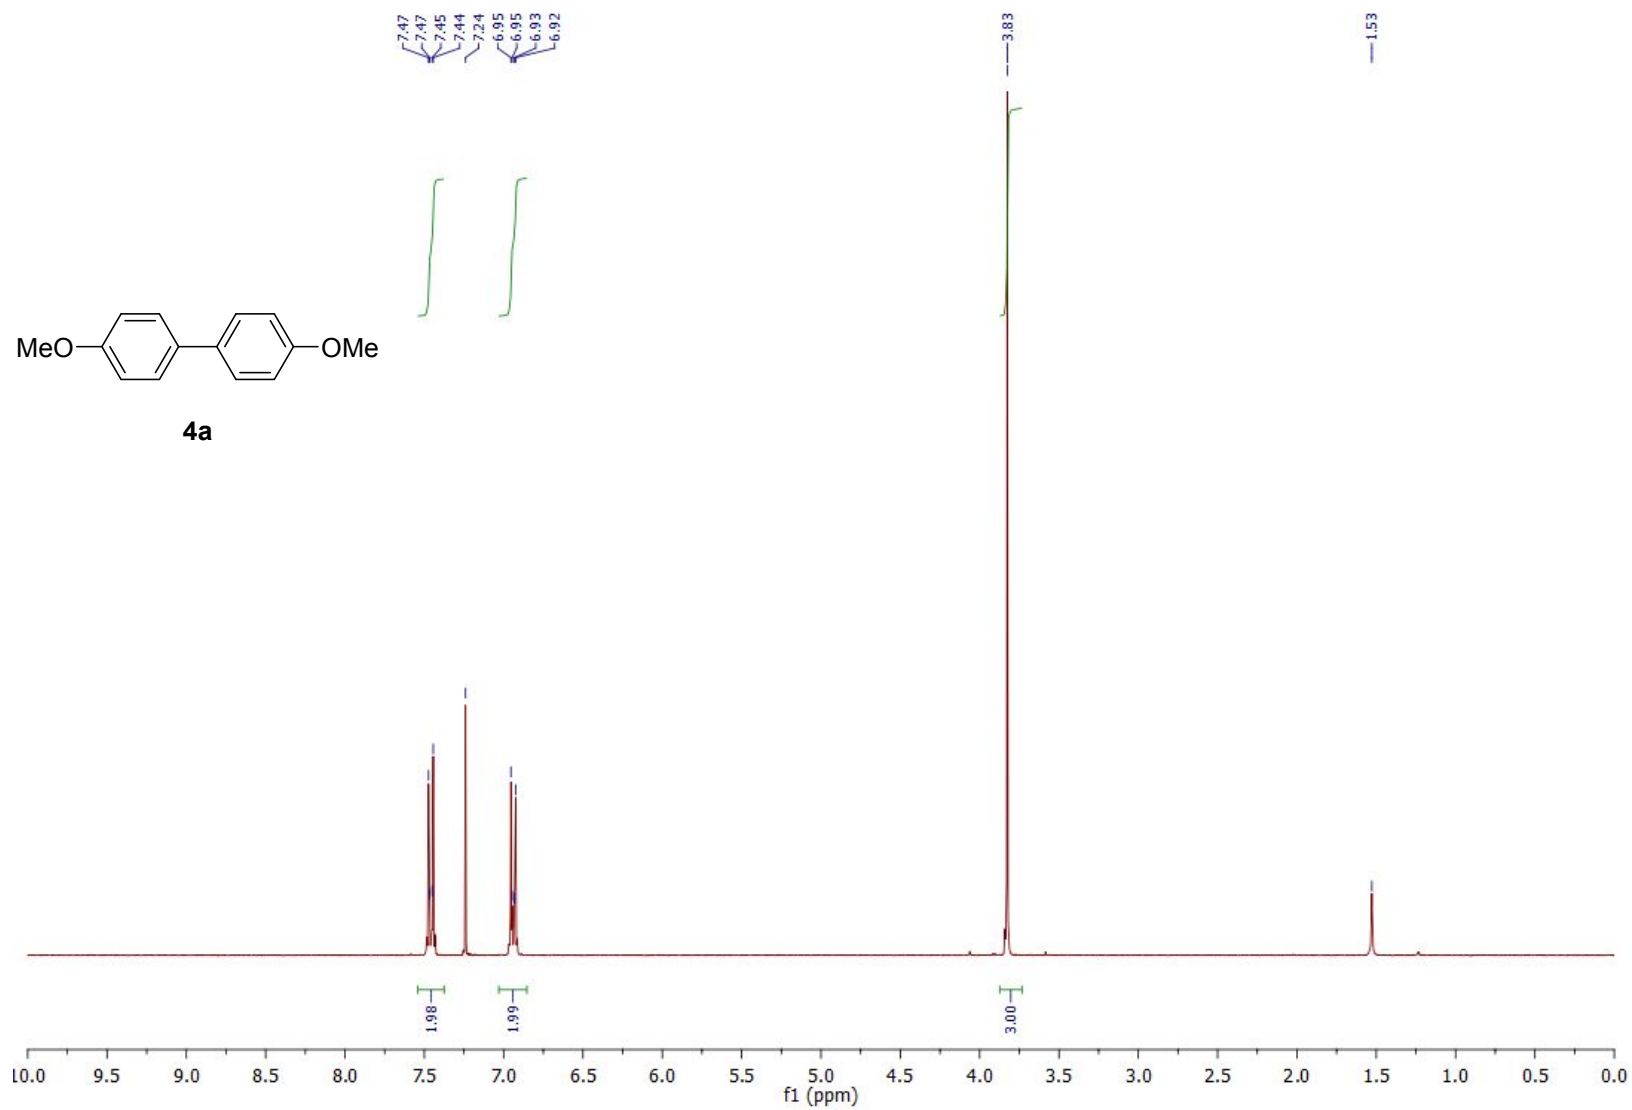

<sup>13</sup>C-NMR spectrum: **4,4'-Dimethoxybiphenyl (4a)**

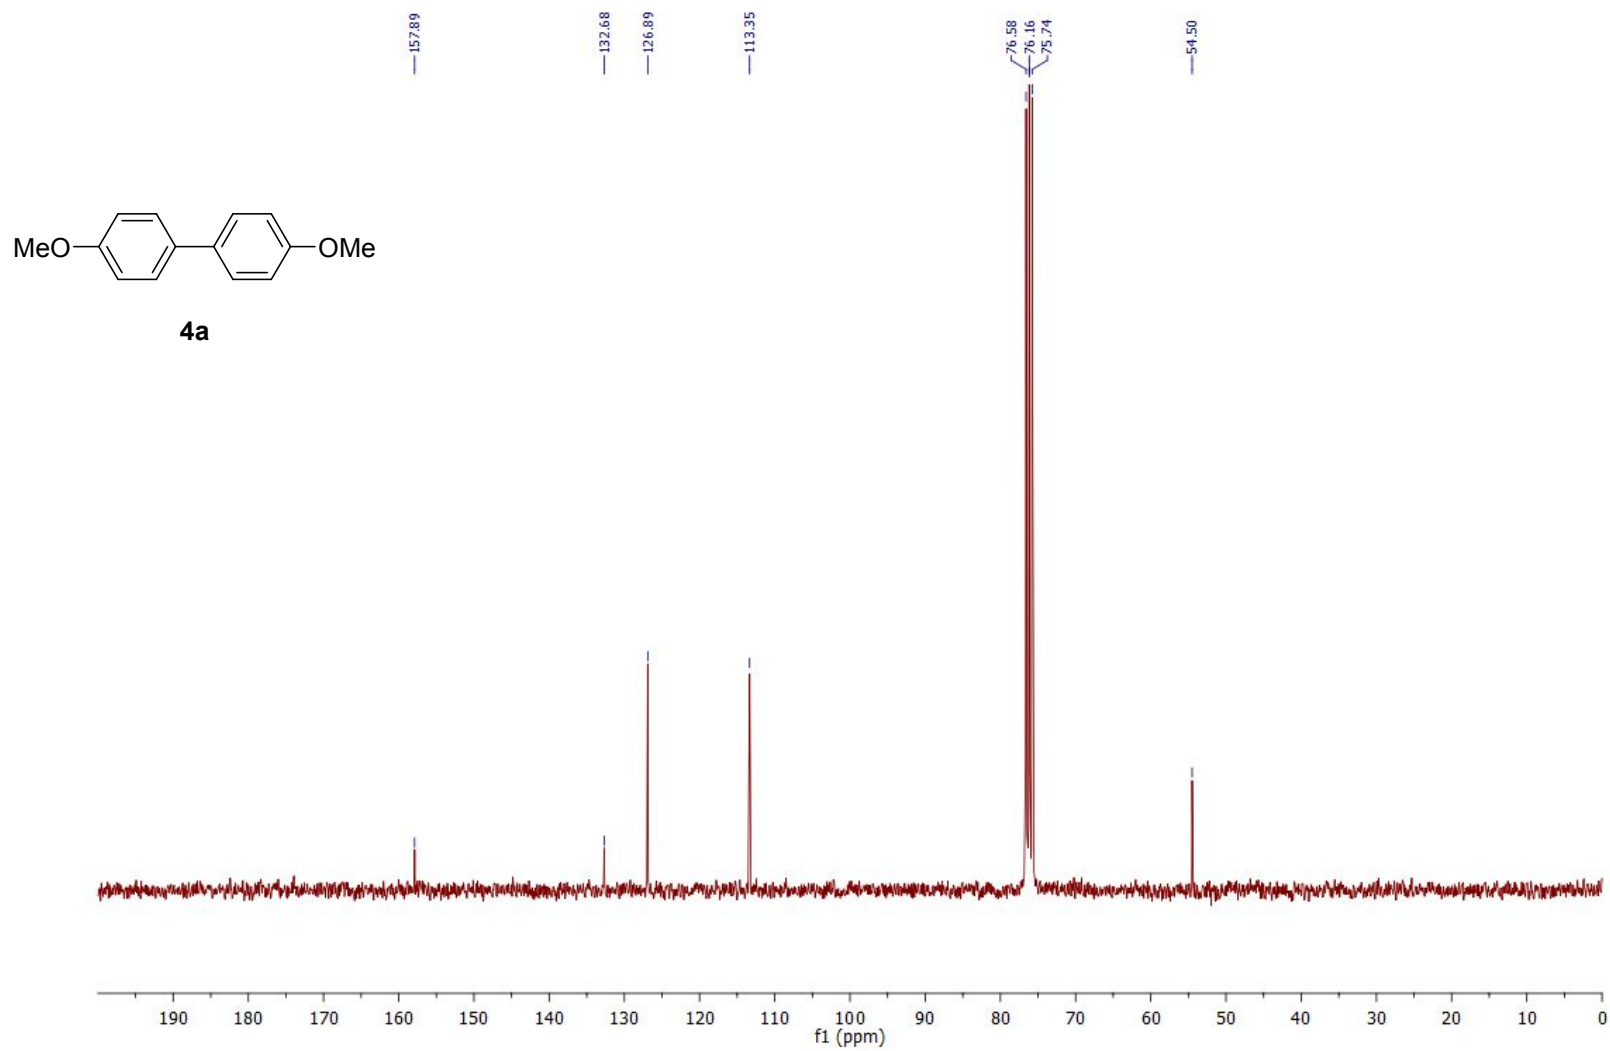

<sup>1</sup>H-NMR spectrum: **2-(4-Methoxyphenyl)pyridine (4b)**

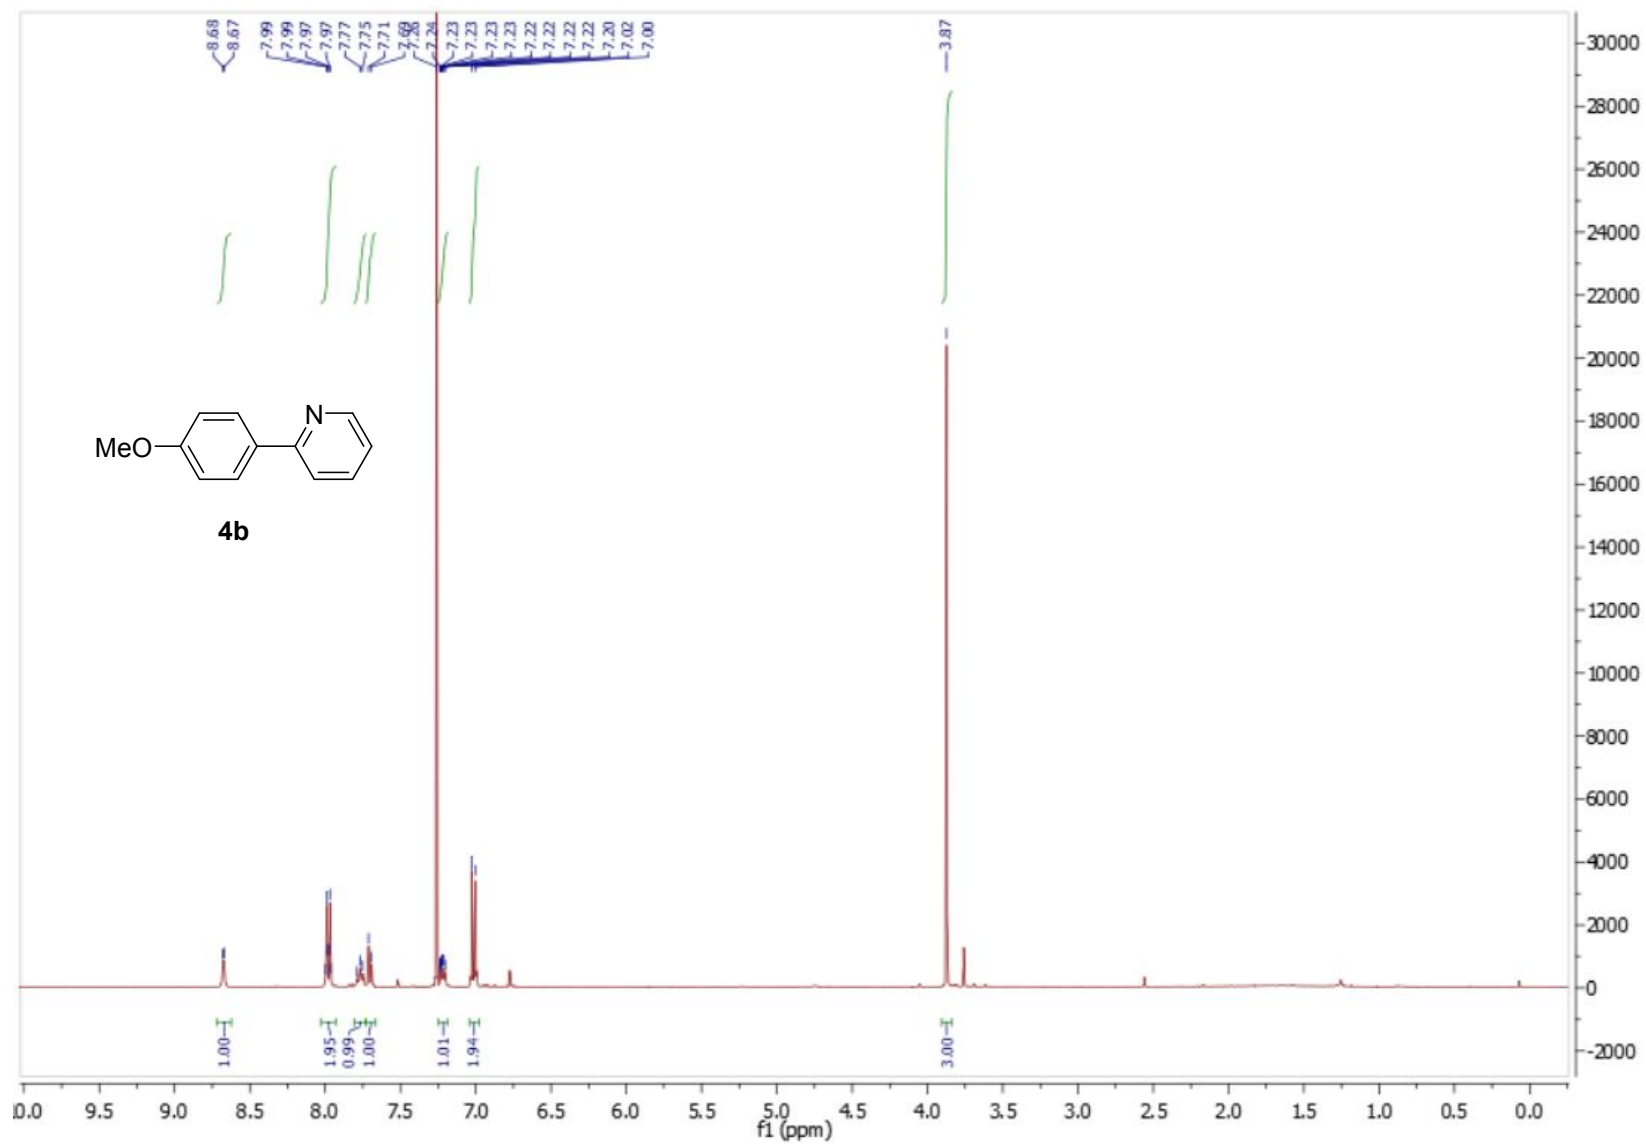

<sup>1</sup>H-NMR spectrum: **2,2'-Dimethoxybiphenyl (5a)**

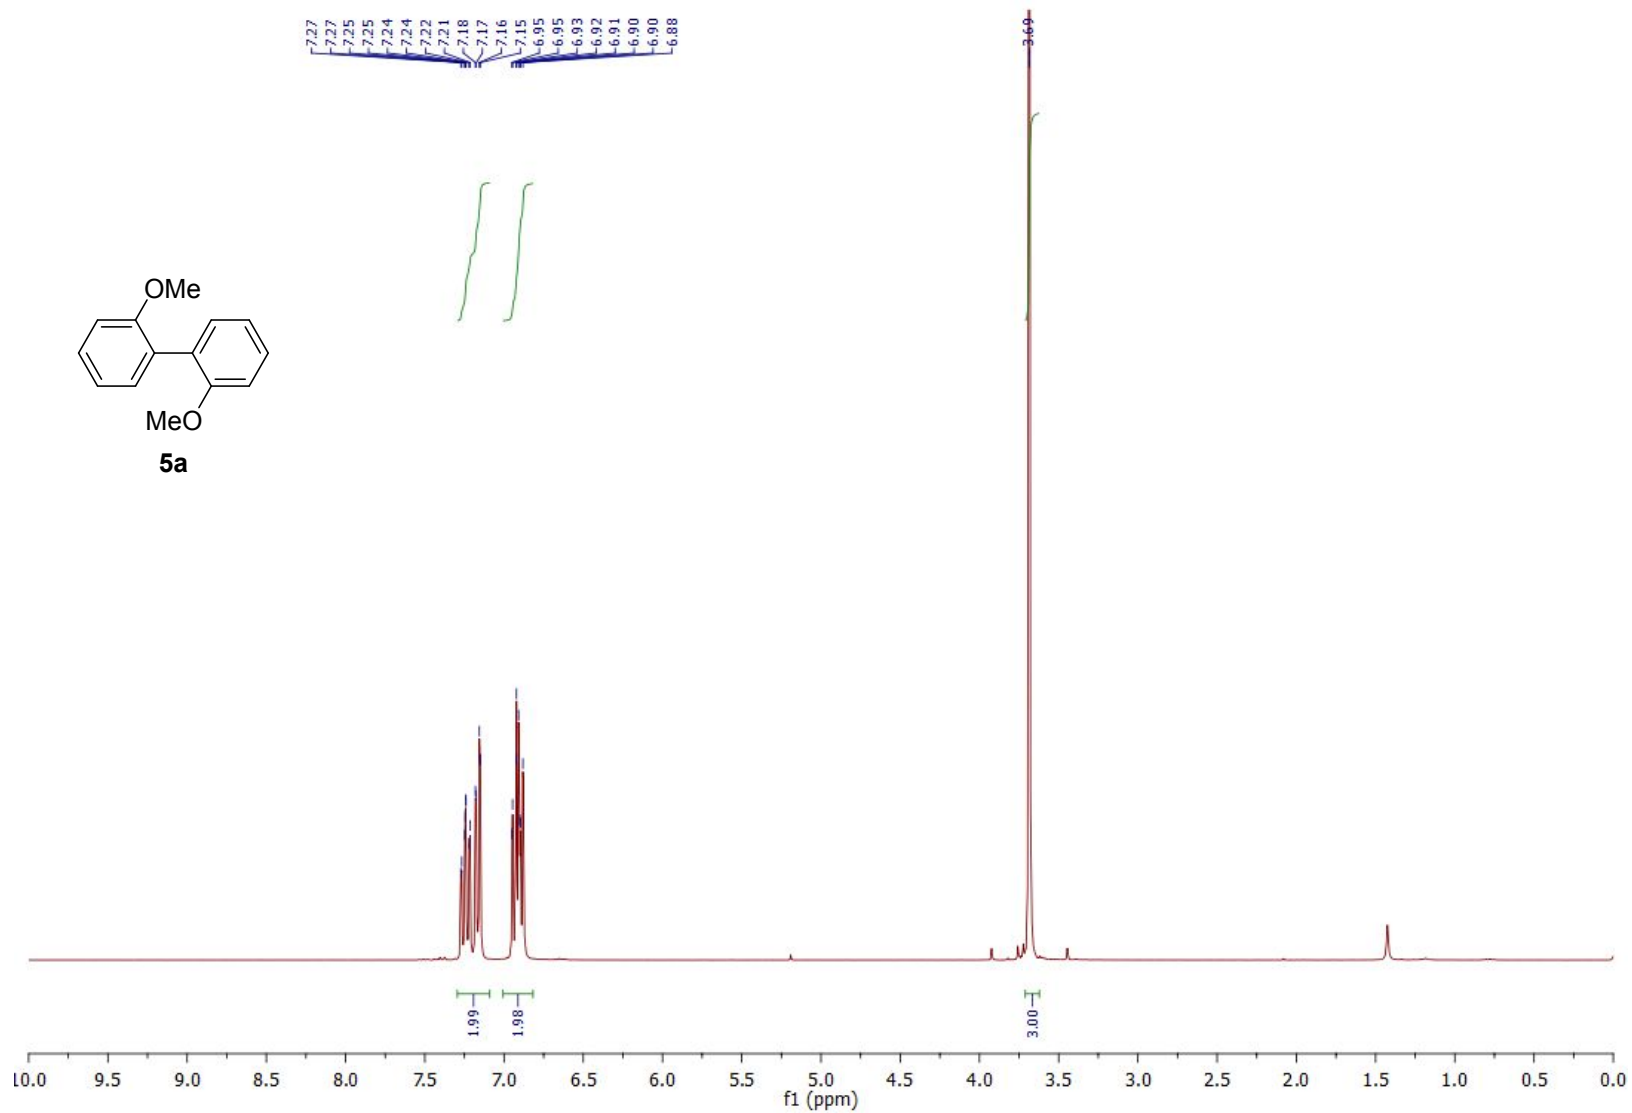

<sup>13</sup>C-NMR spectrum: **2,2'-Dimethoxybiphenyl (5a)**

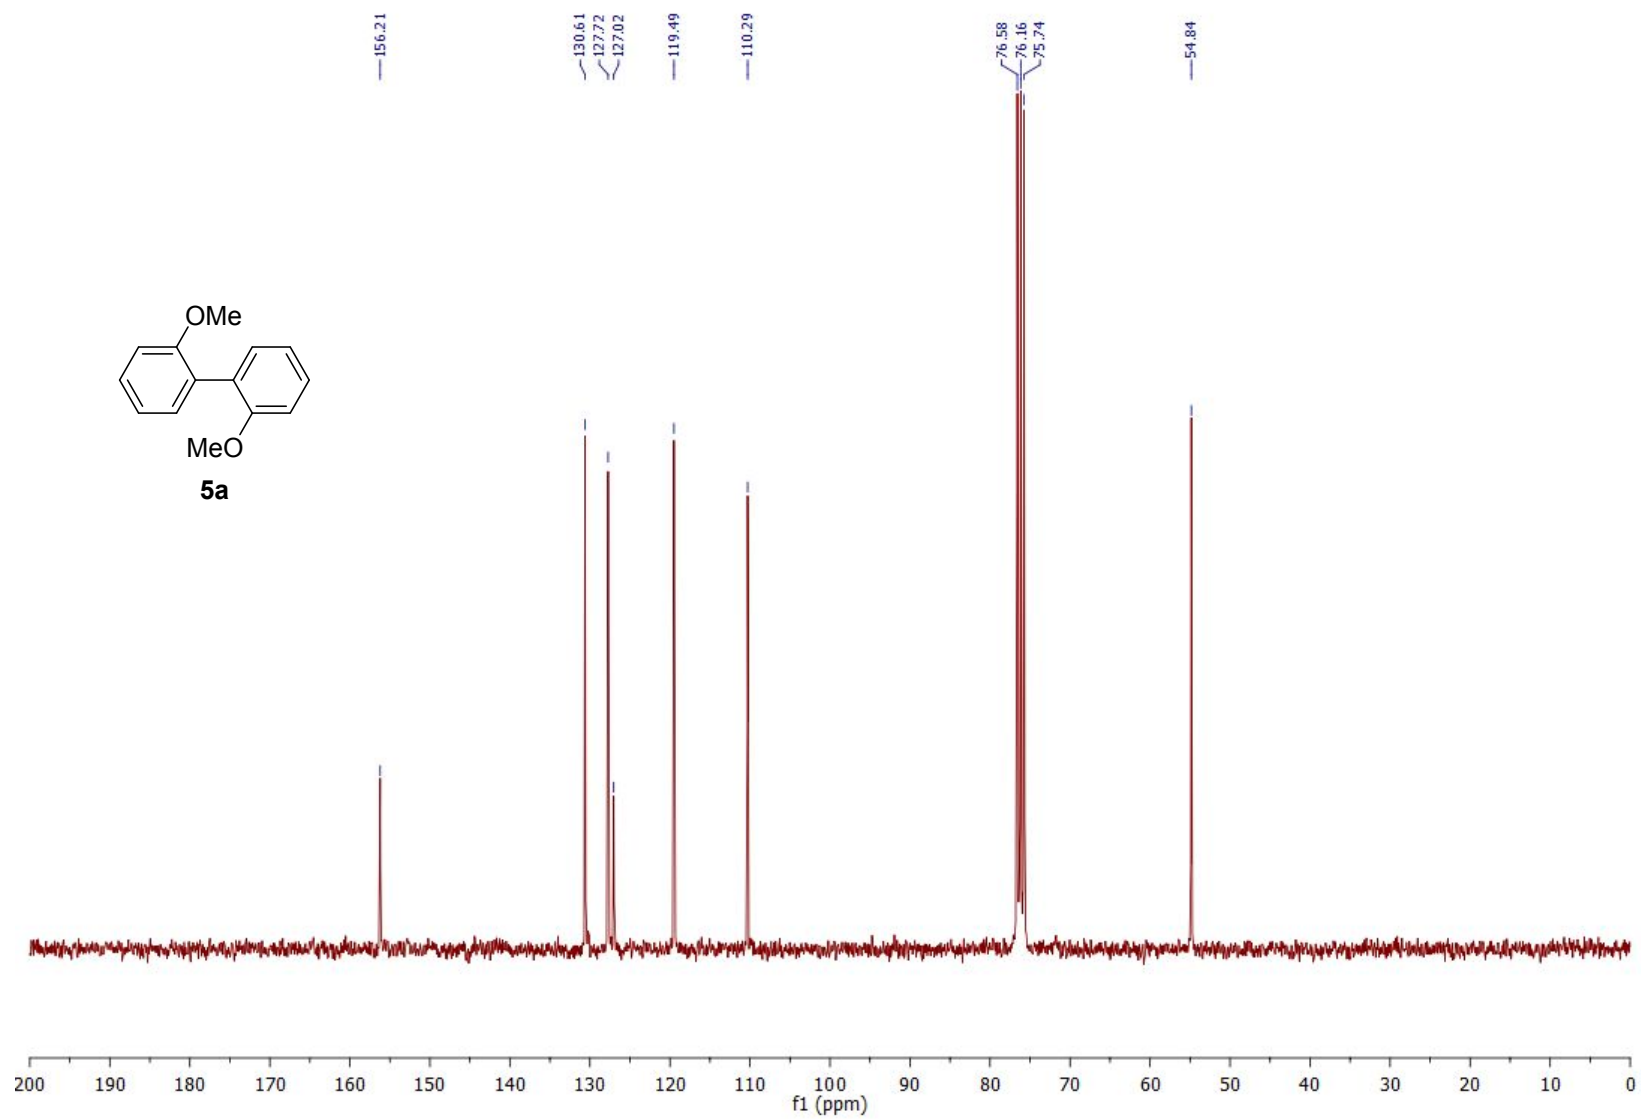

<sup>1</sup>H-NMR spectrum: 4,4'-di-*N,N*-Dimethylaminobiphenyl (6a)

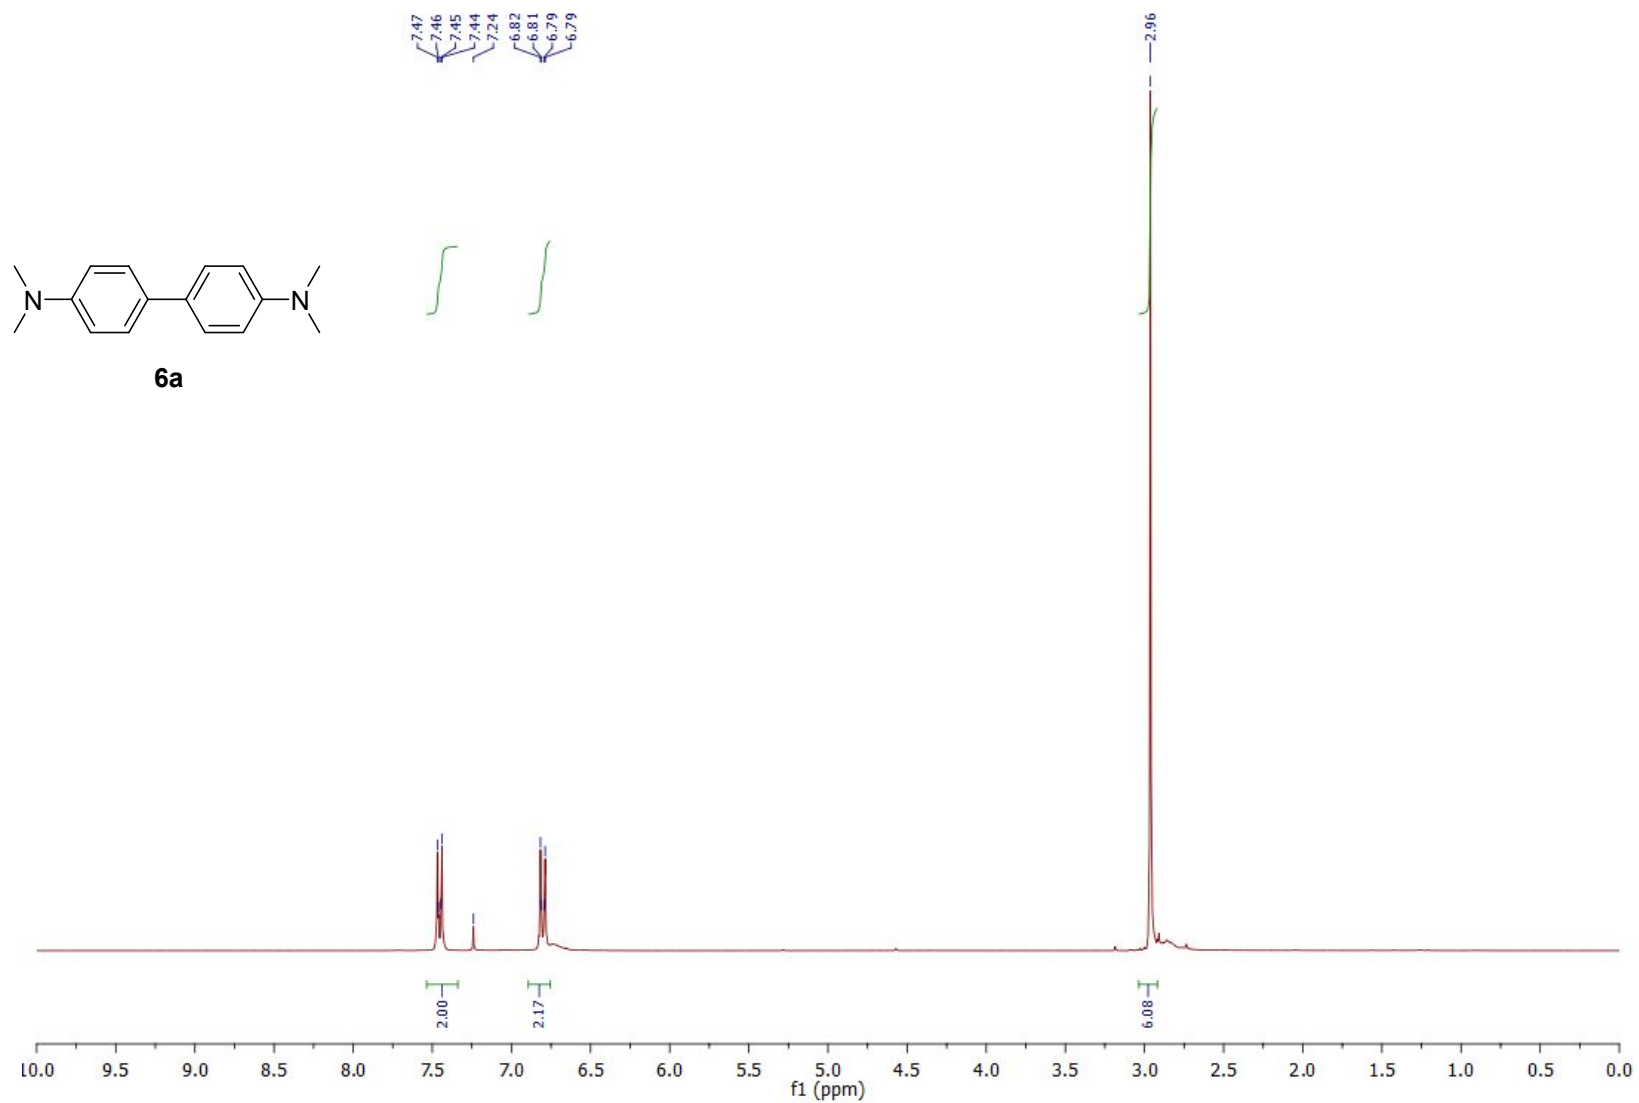

<sup>13</sup>C-NMR spectrum: 4,4'-di-*N,N*-Dimethylaminobiphenyl (6a)

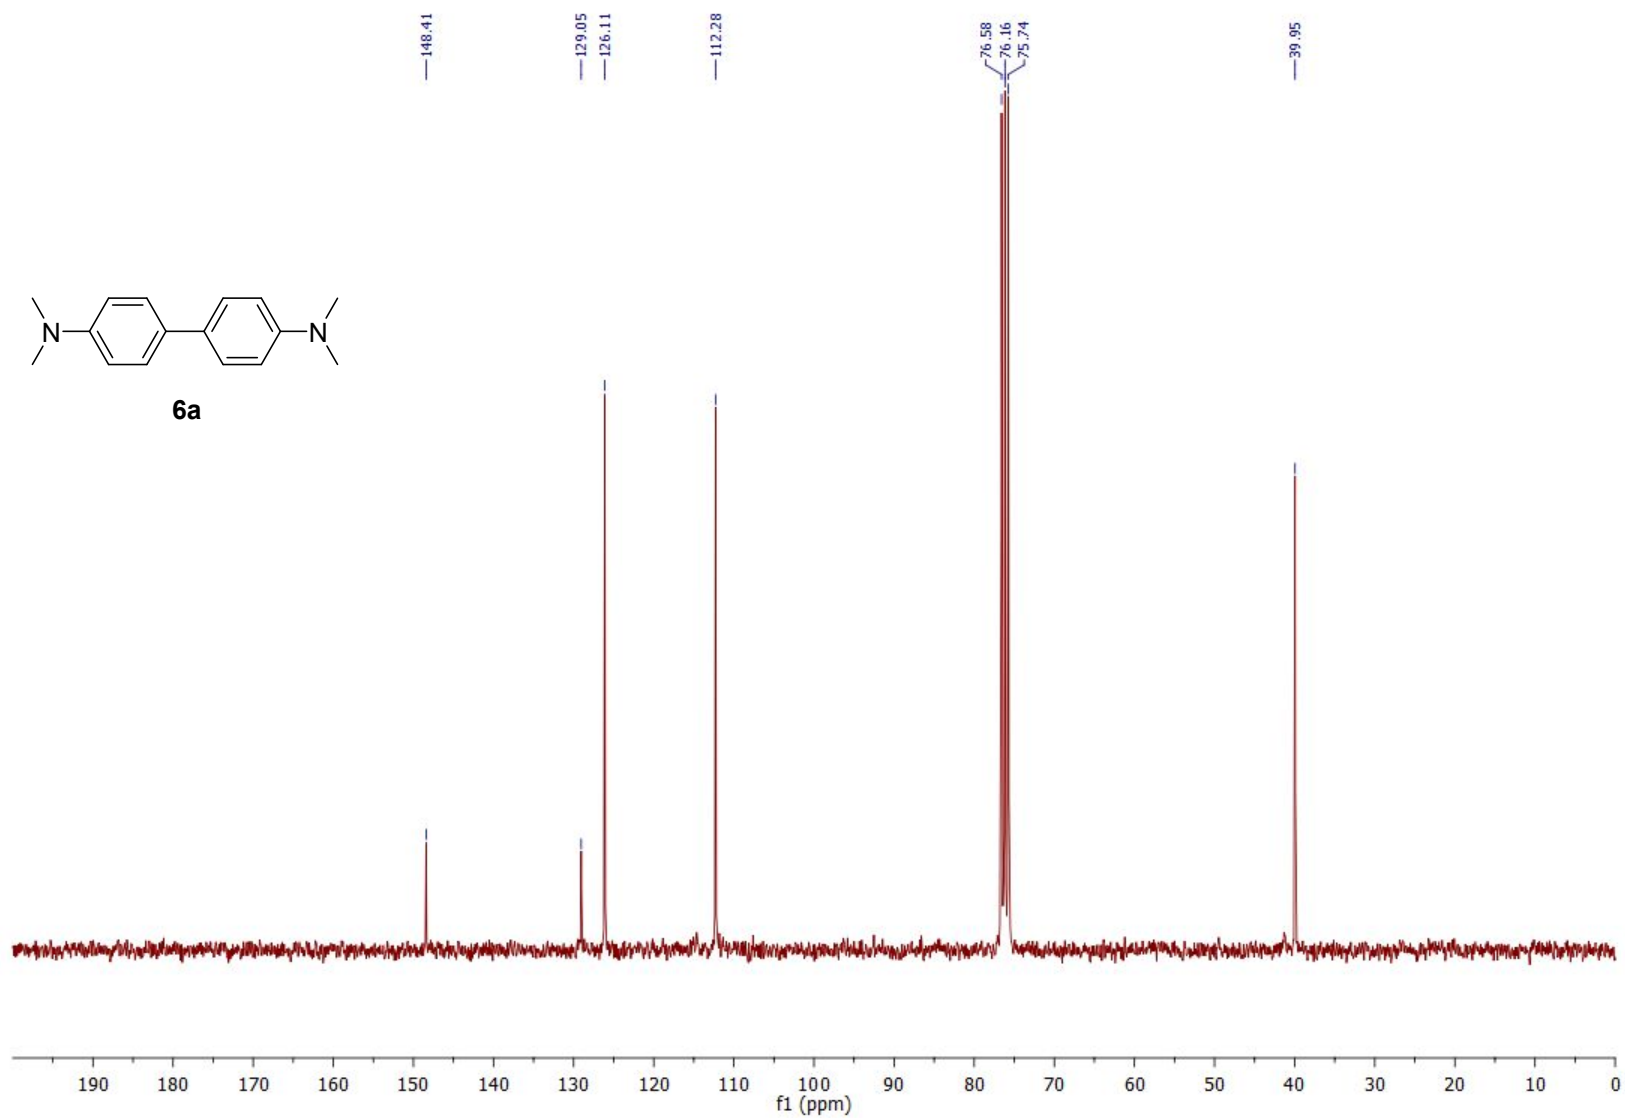

<sup>1</sup>H-NMR spectrum: *N,N*-Dimethyl-4-(pyridin-2-yl)aniline (**6b**)

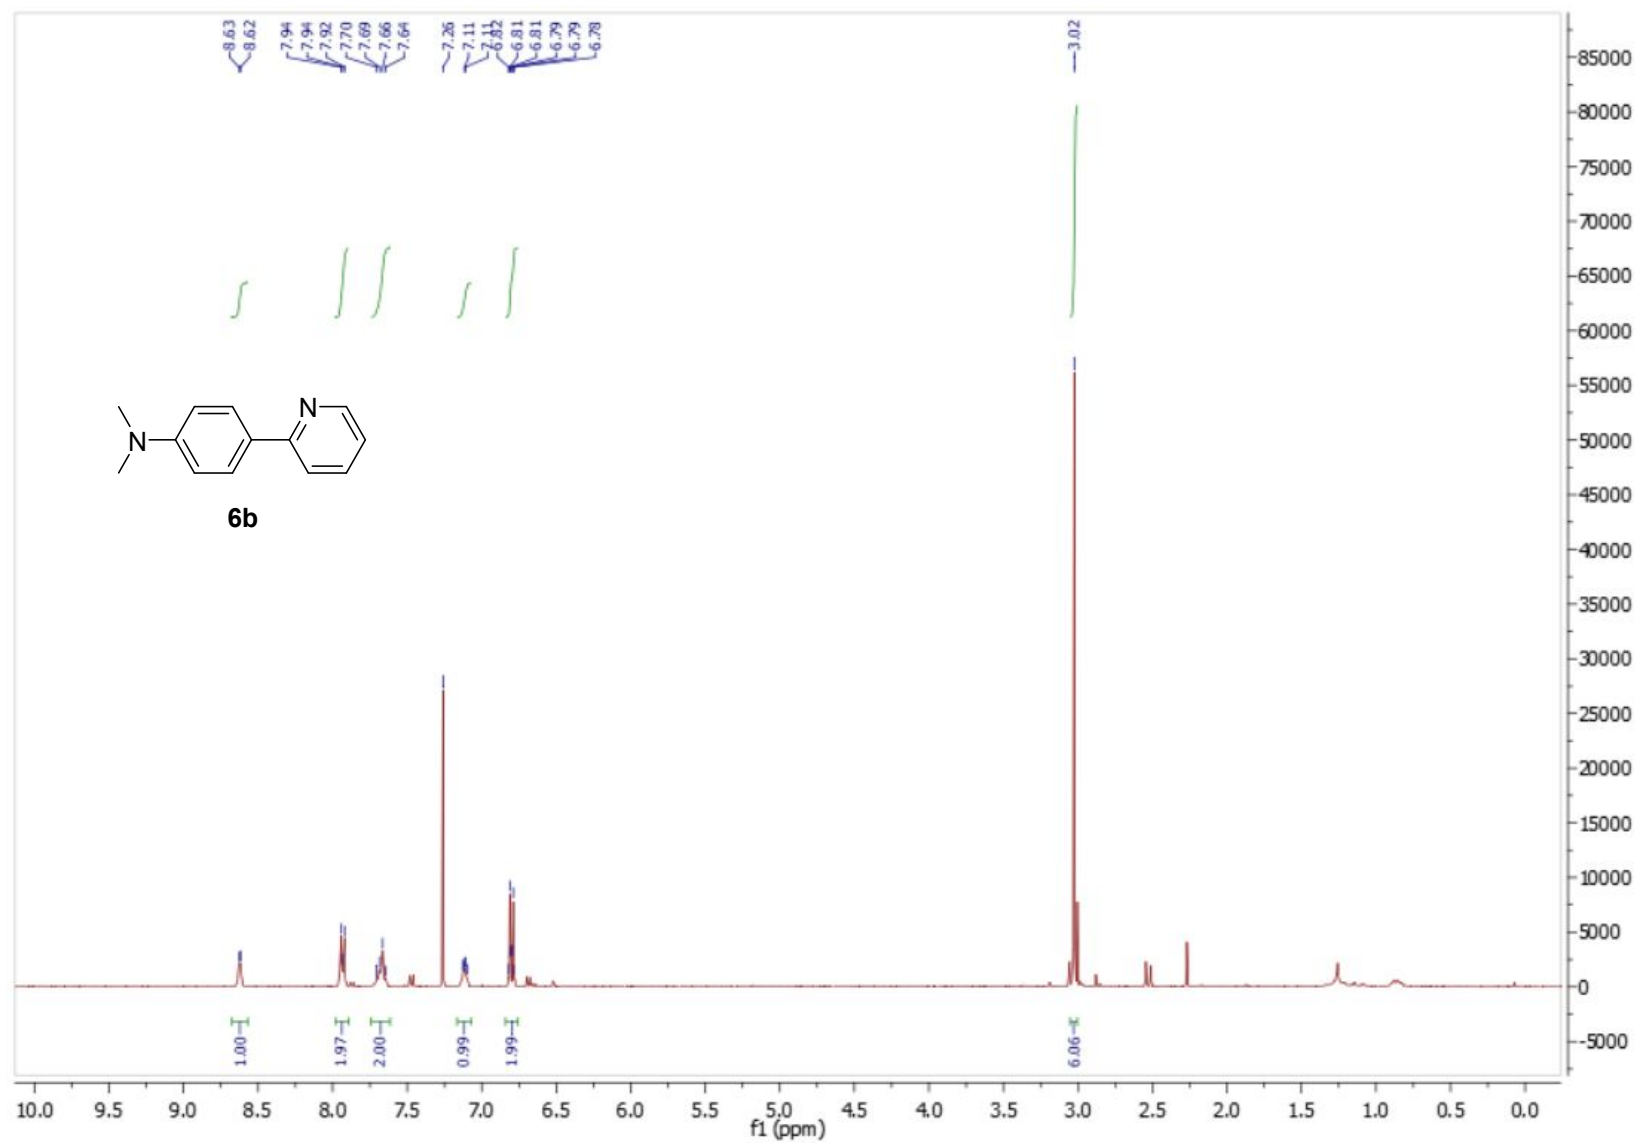



<sup>13</sup>C-NMR spectrum: *N,N*-Dimethyl-4-(pyridin-2-yl)aniline (**6b**)

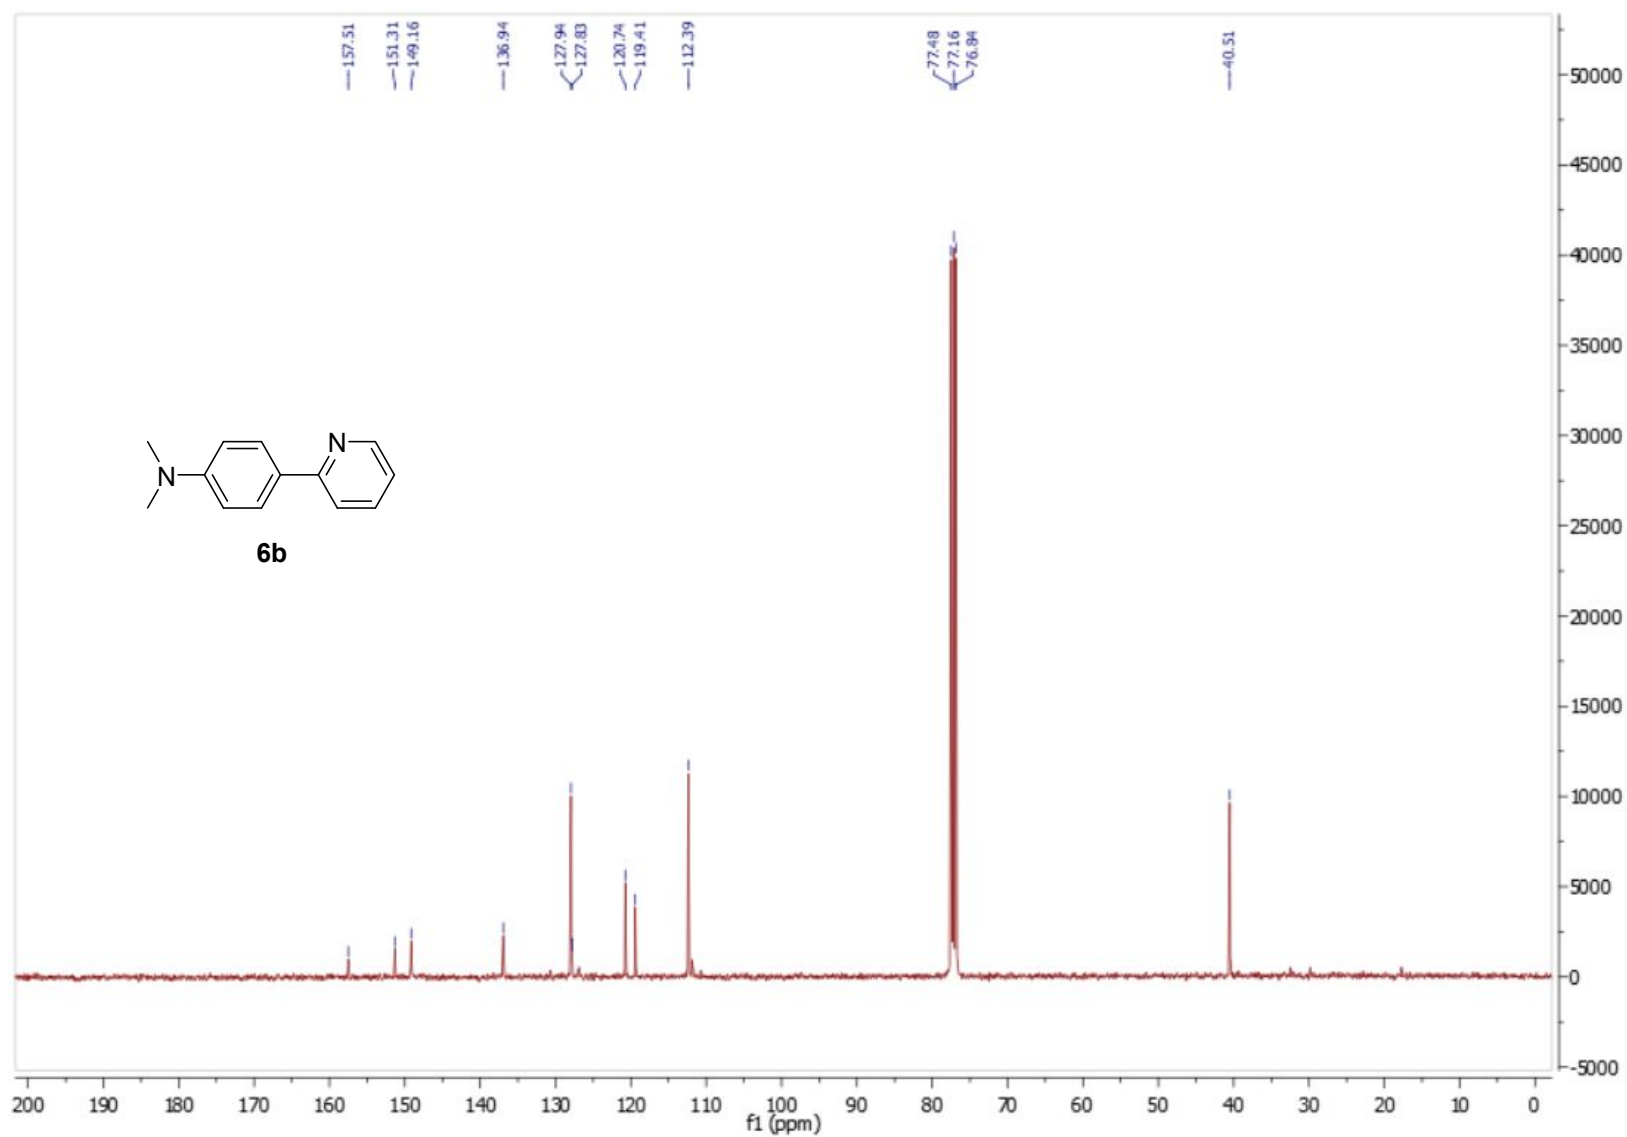

<sup>1</sup>H-NMR spectrum: **4,4'-Bis(trifluoromethyl)-1,1'-biphenyl (7a)**

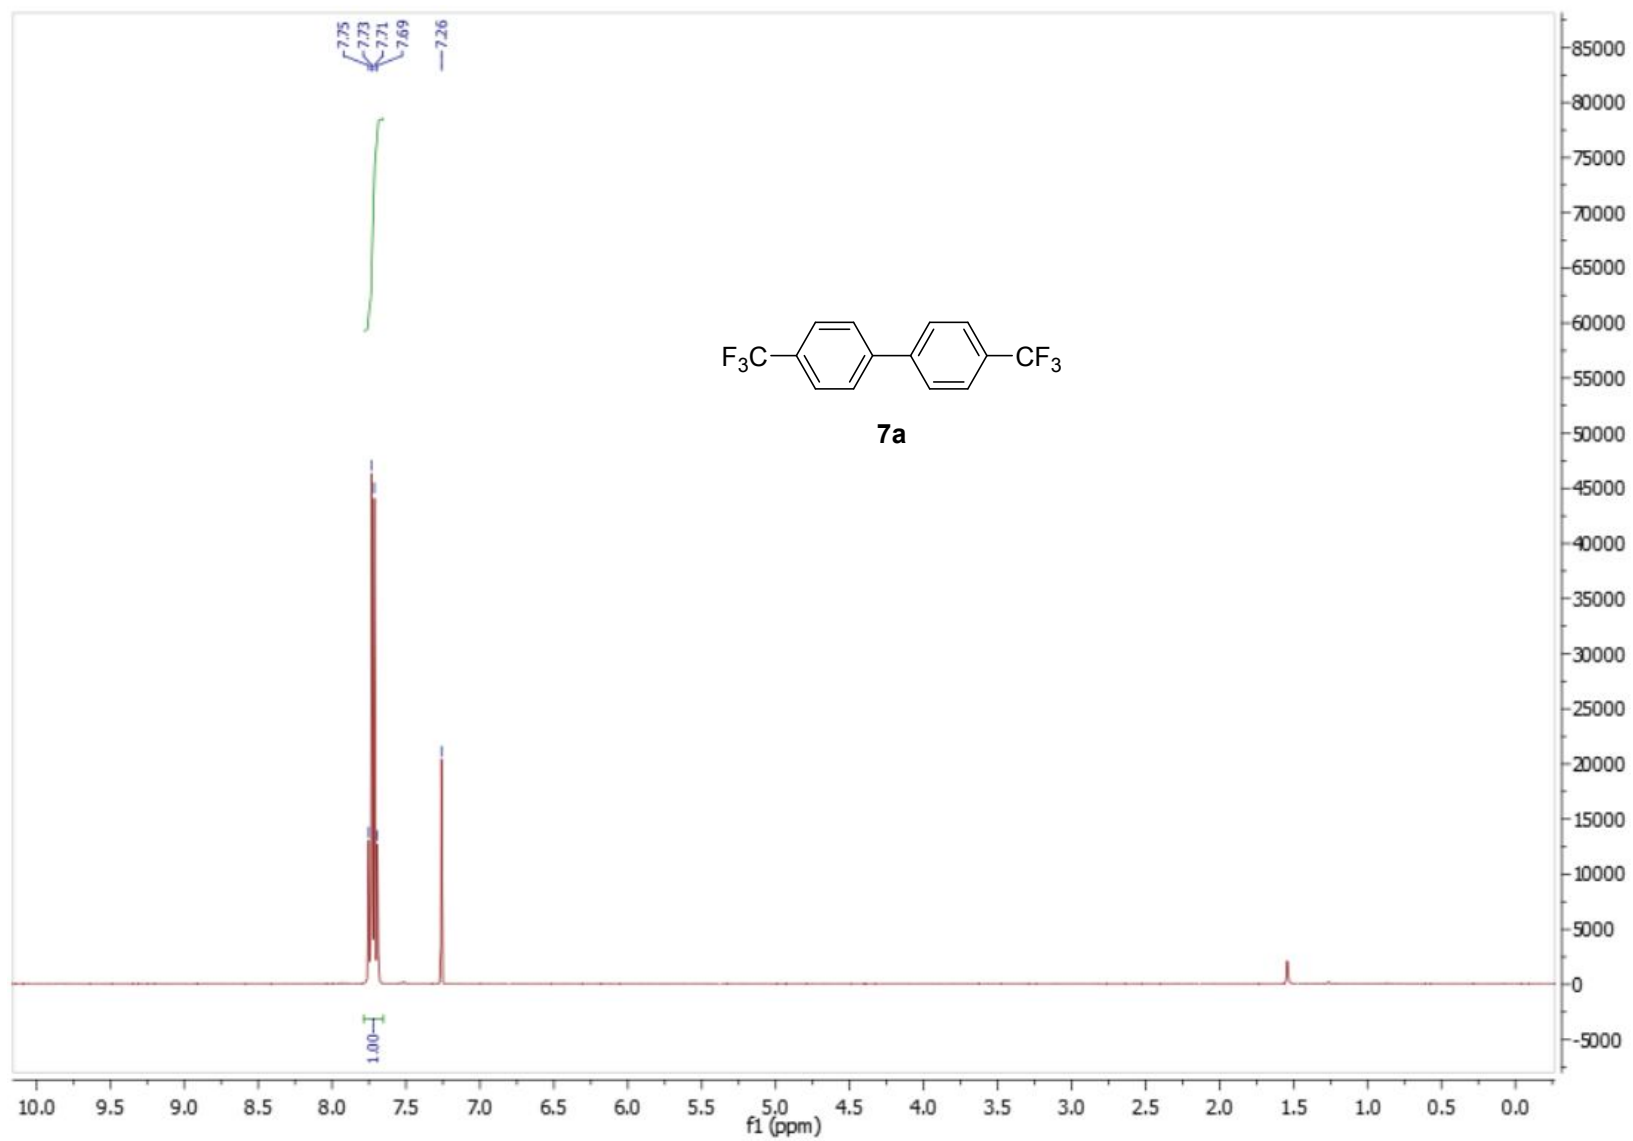

<sup>13</sup>C-NMR spectrum: **4,4'-Bis(trifluoromethyl)-1,1'-biphenyl (7a)**

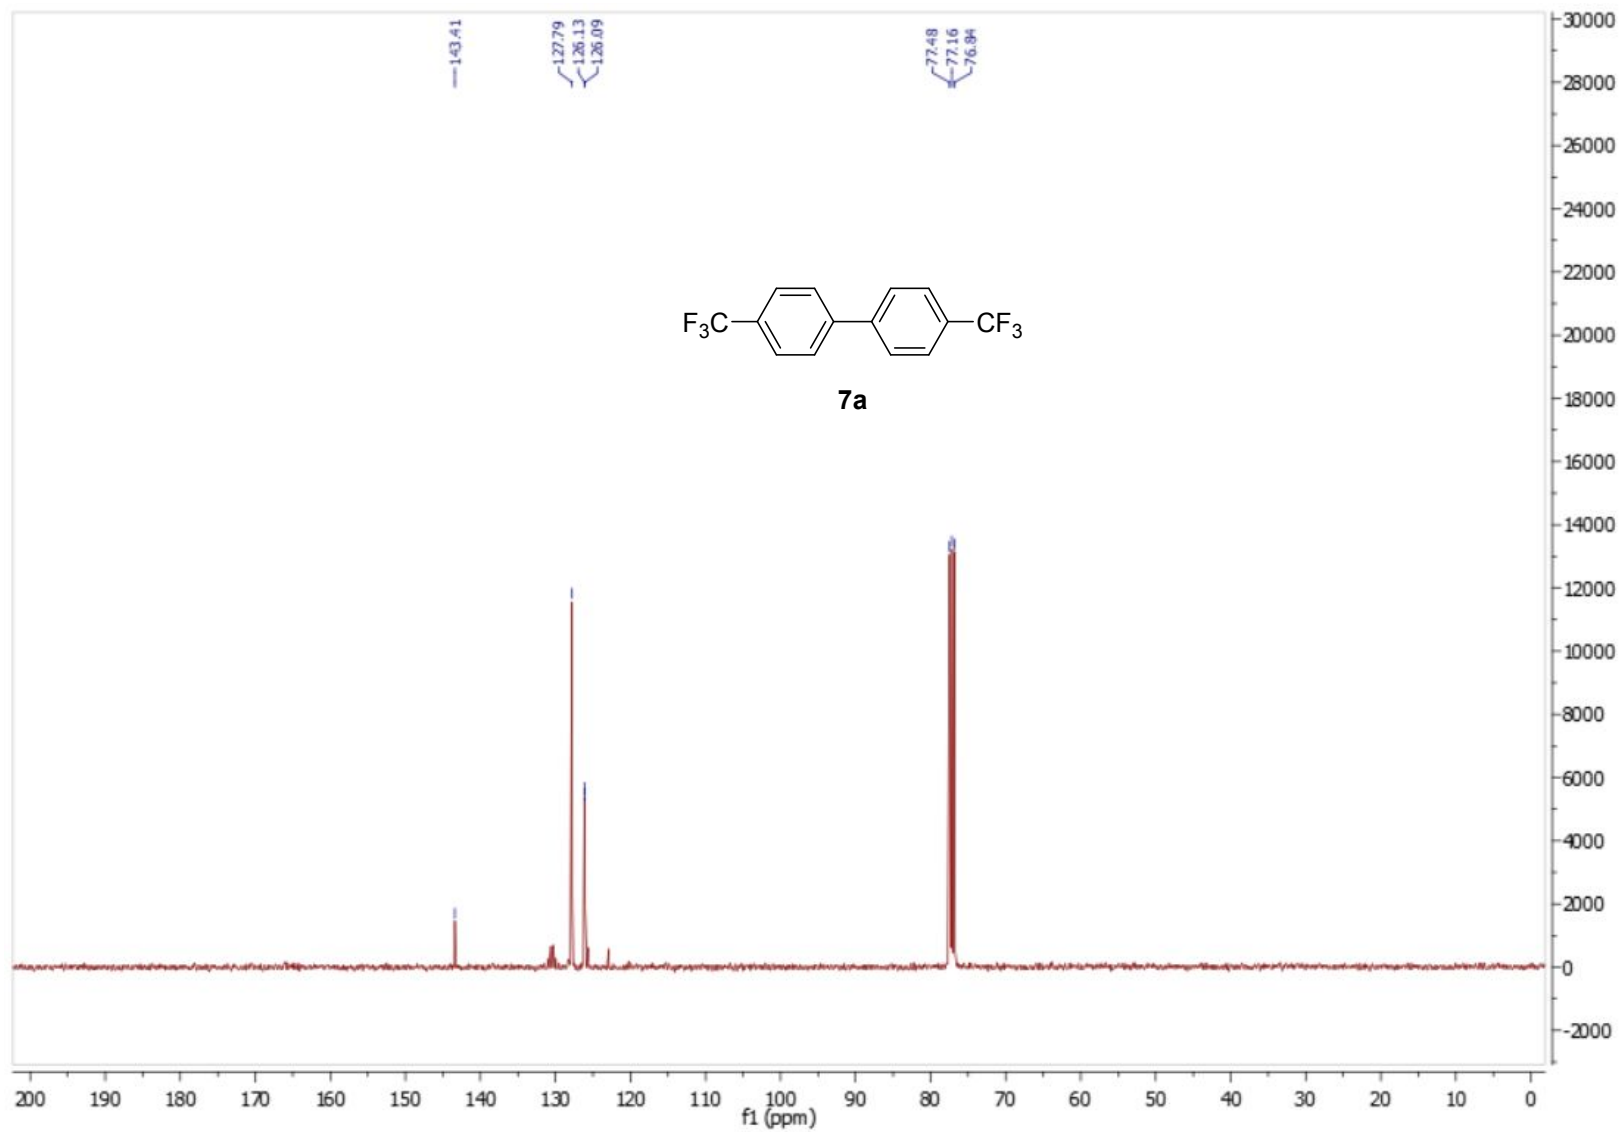

<sup>19</sup>F-NMR spectrum: **4,4'-Bis(trifluoromethyl)-1,1'-biphenyl (7a)**

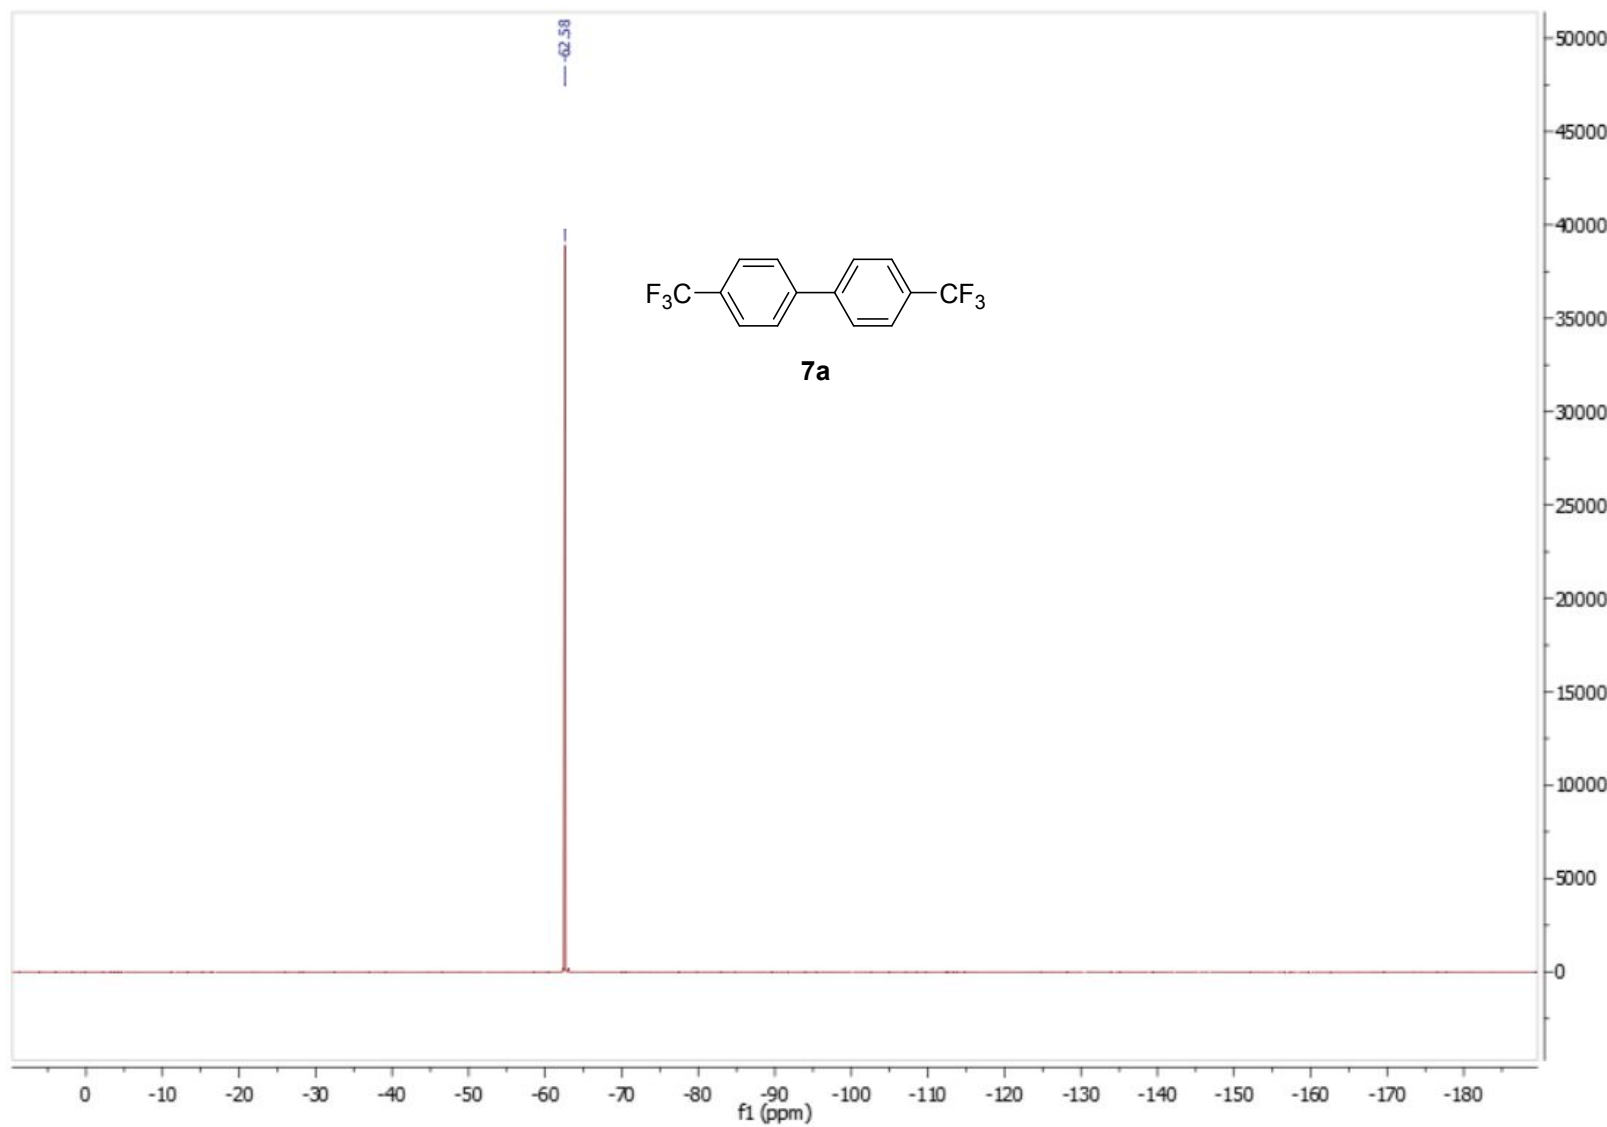

<sup>1</sup>H-NMR spectrum: **4,4'-Difluorobiphenyl (8a)**

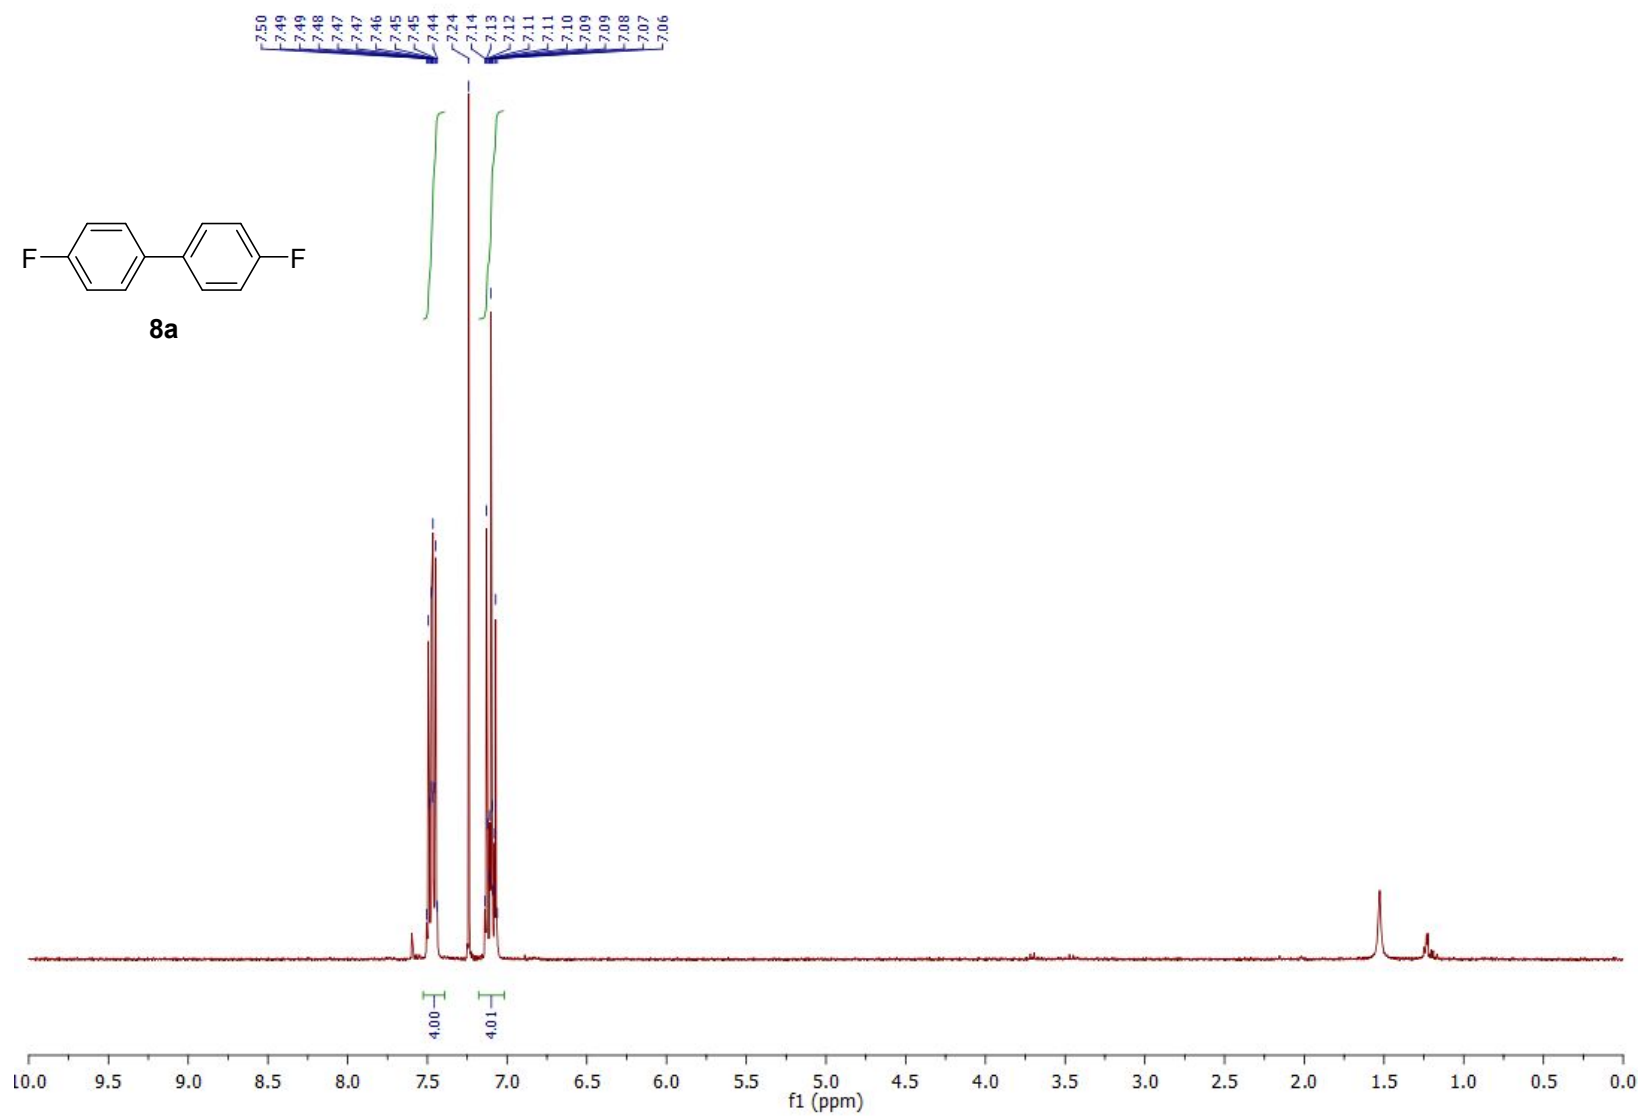

<sup>13</sup>C-NMR spectrum: **4,4'-Difluorobiphenyl (8a)**

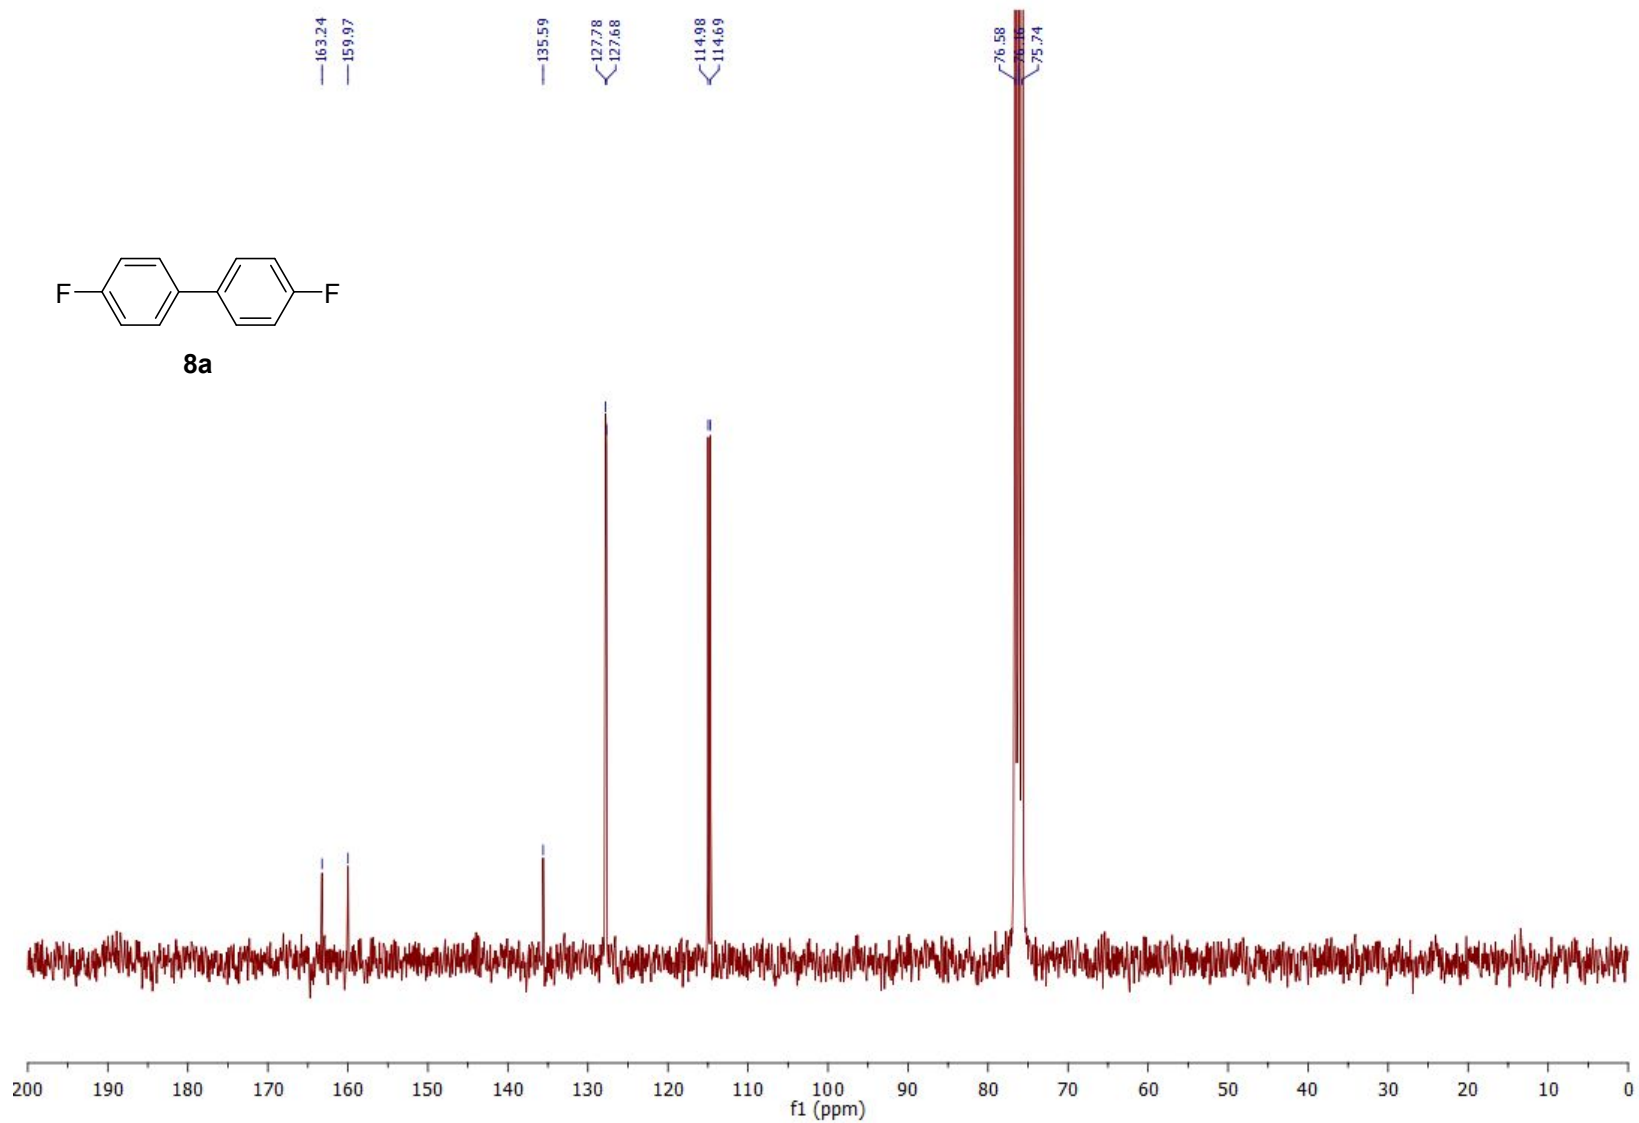

<sup>19</sup>F-NMR spectrum: **4,4'-Difluorobiphenyl (8a)**

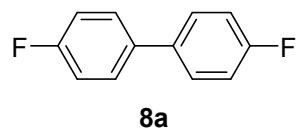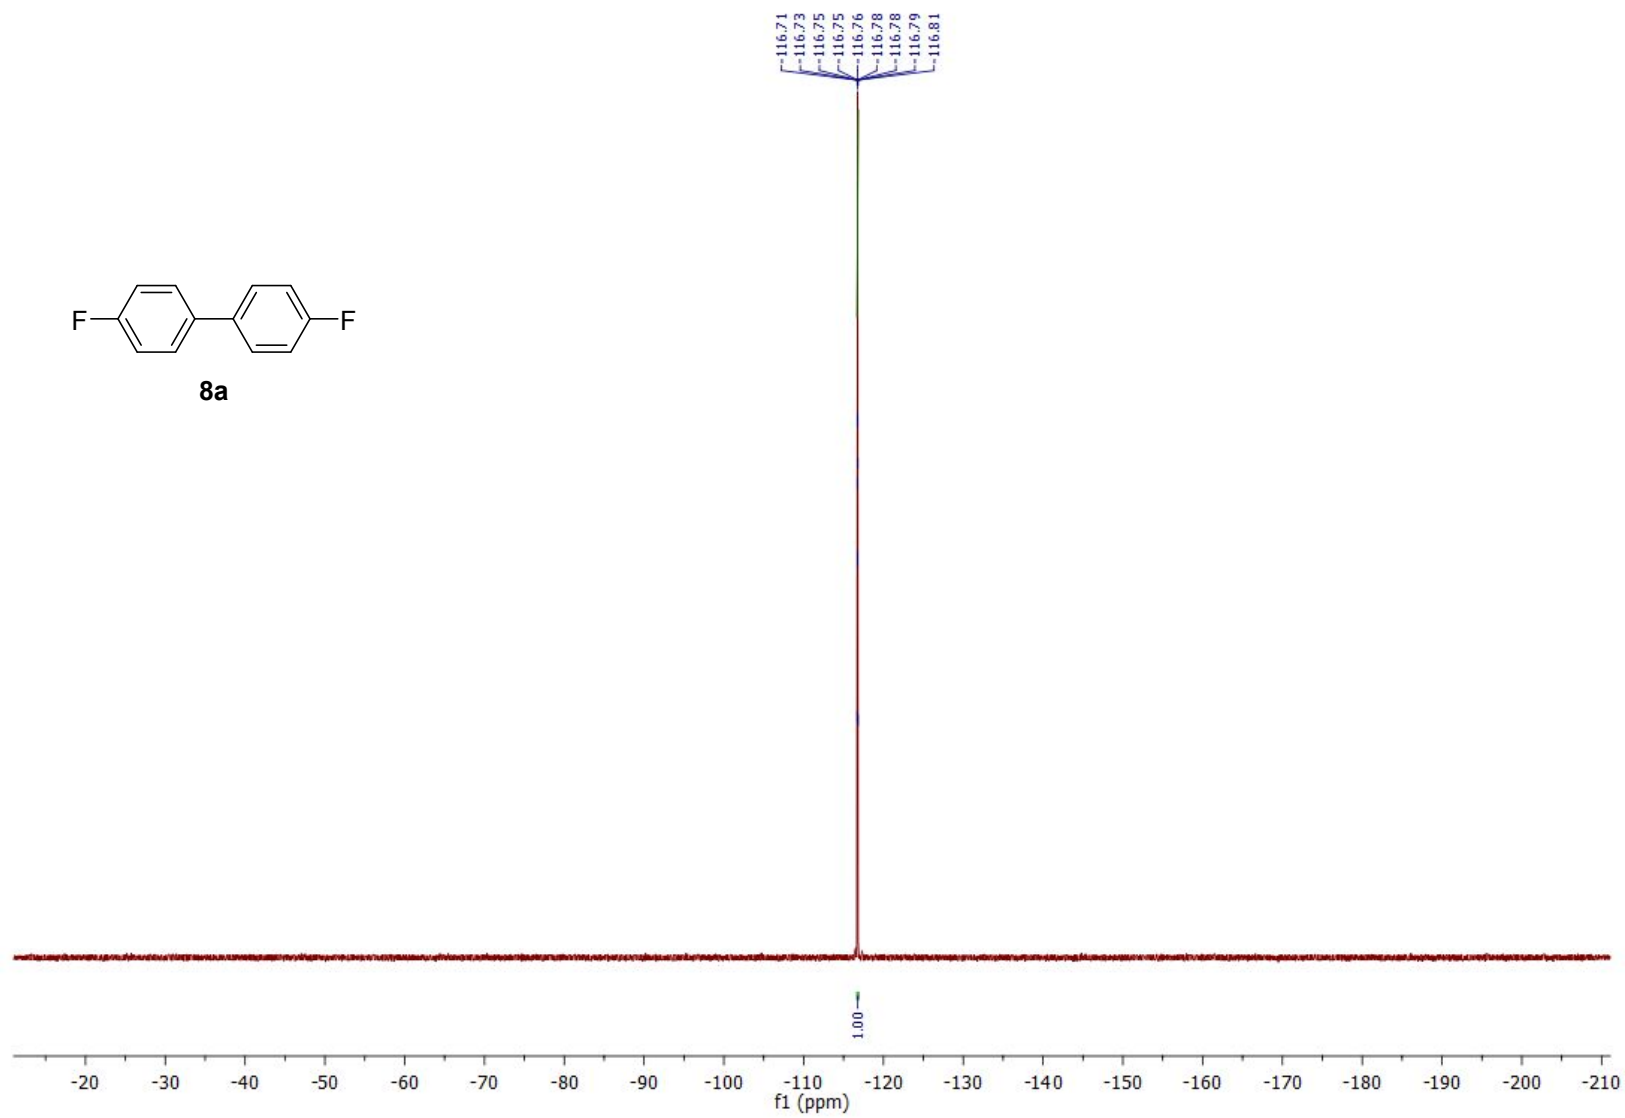

<sup>1</sup>H-NMR spectrum: **2-(4-Fluorophenyl)pyridine (8b)**

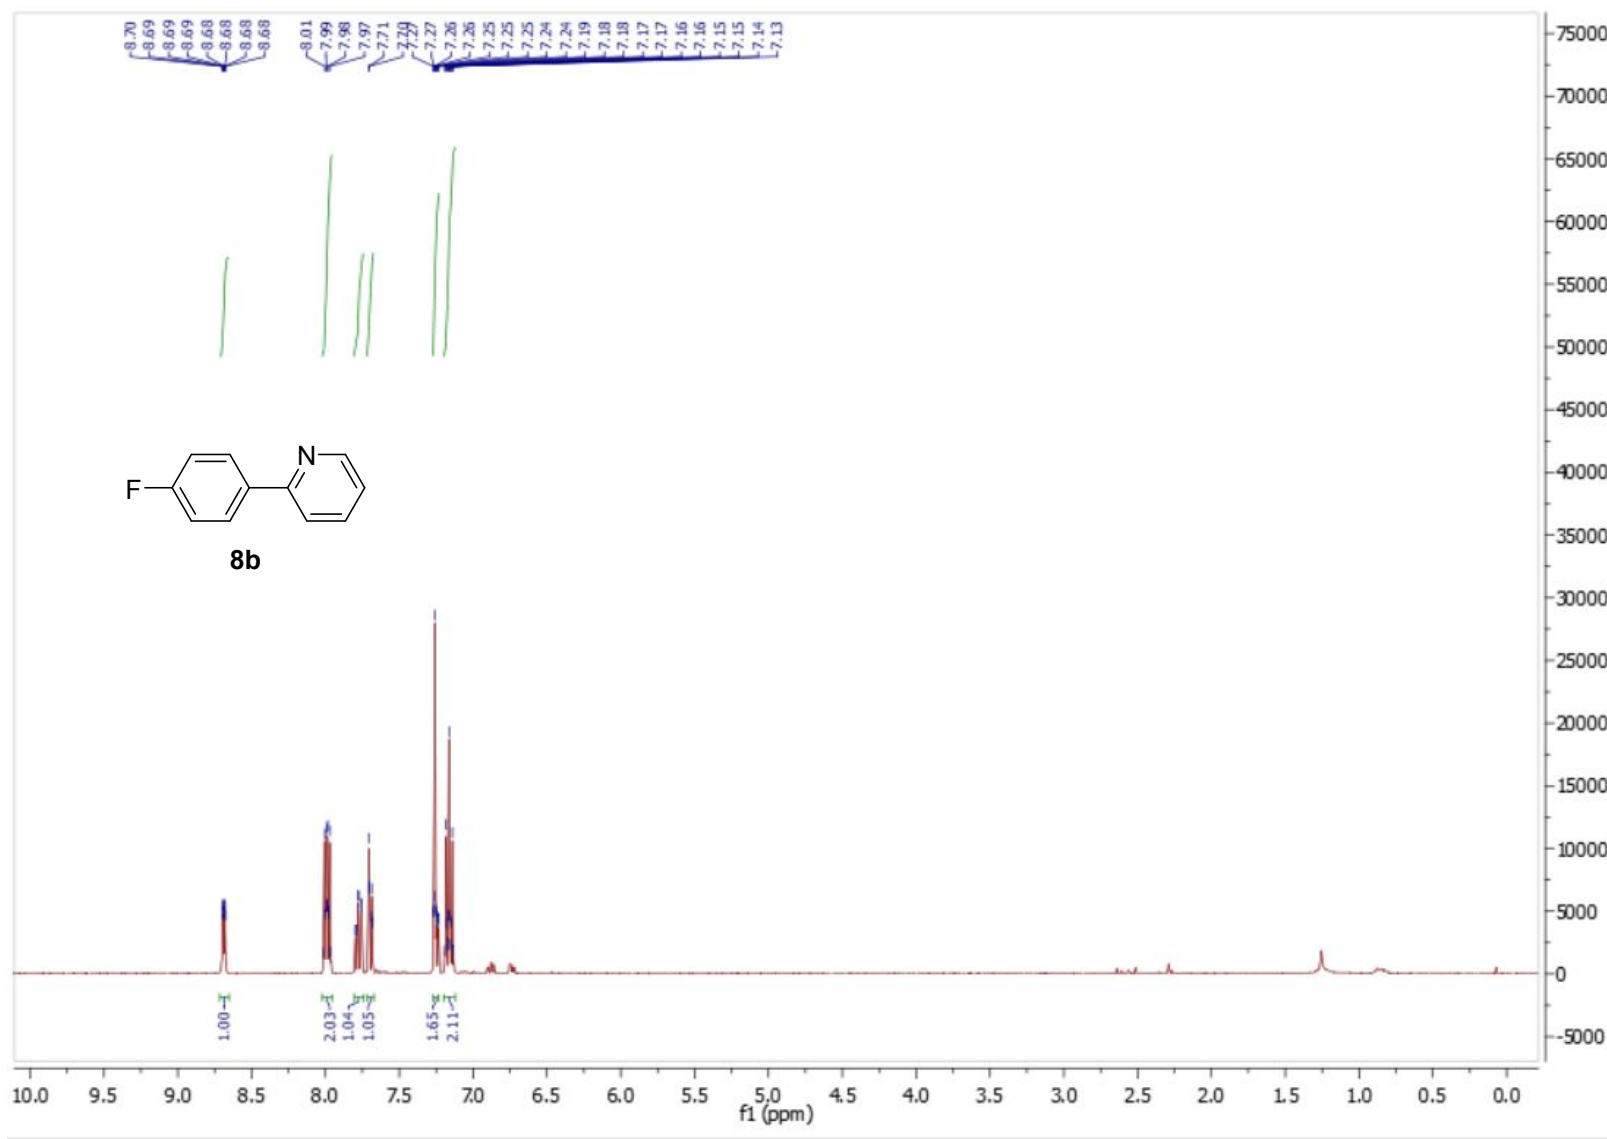



<sup>13</sup>C-NMR spectrum: **2-(4-Fluorophenyl)pyridine (8b)**

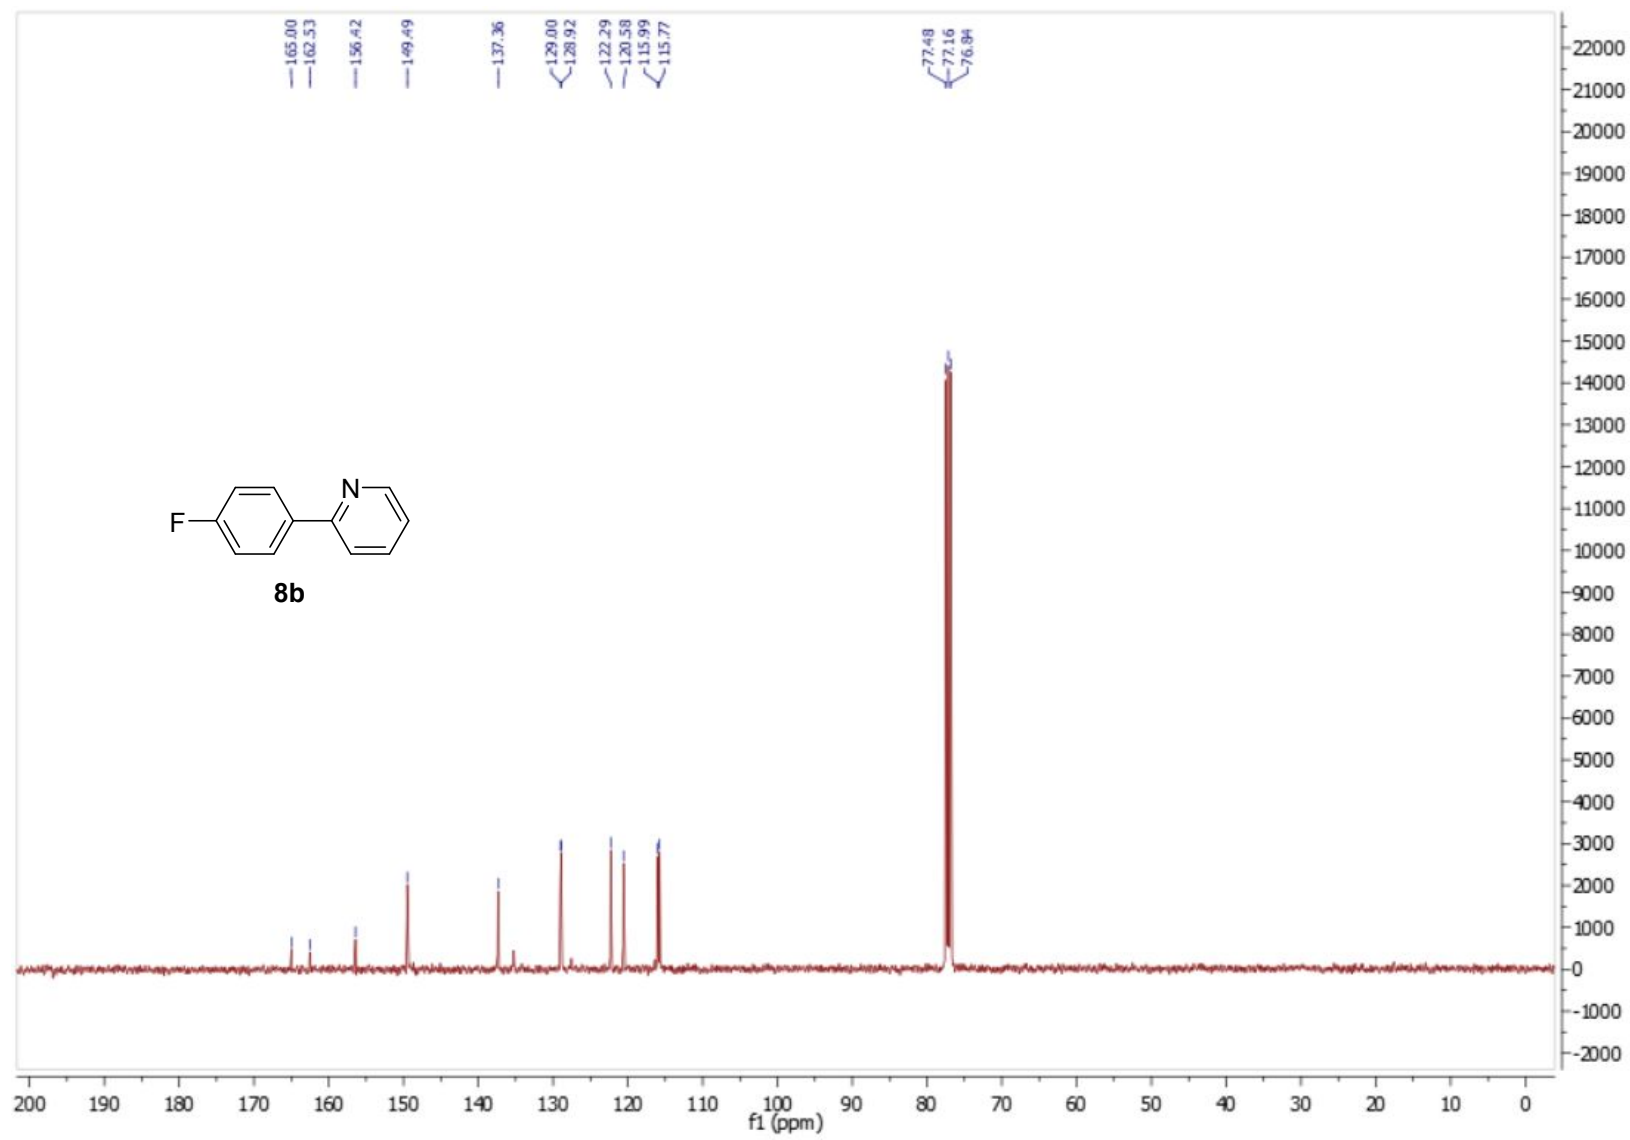

$^1\text{H}$ -NMR spectrum: **2,2',4,4',6,6'**-Hexamethylbiphenyl (**9a**)

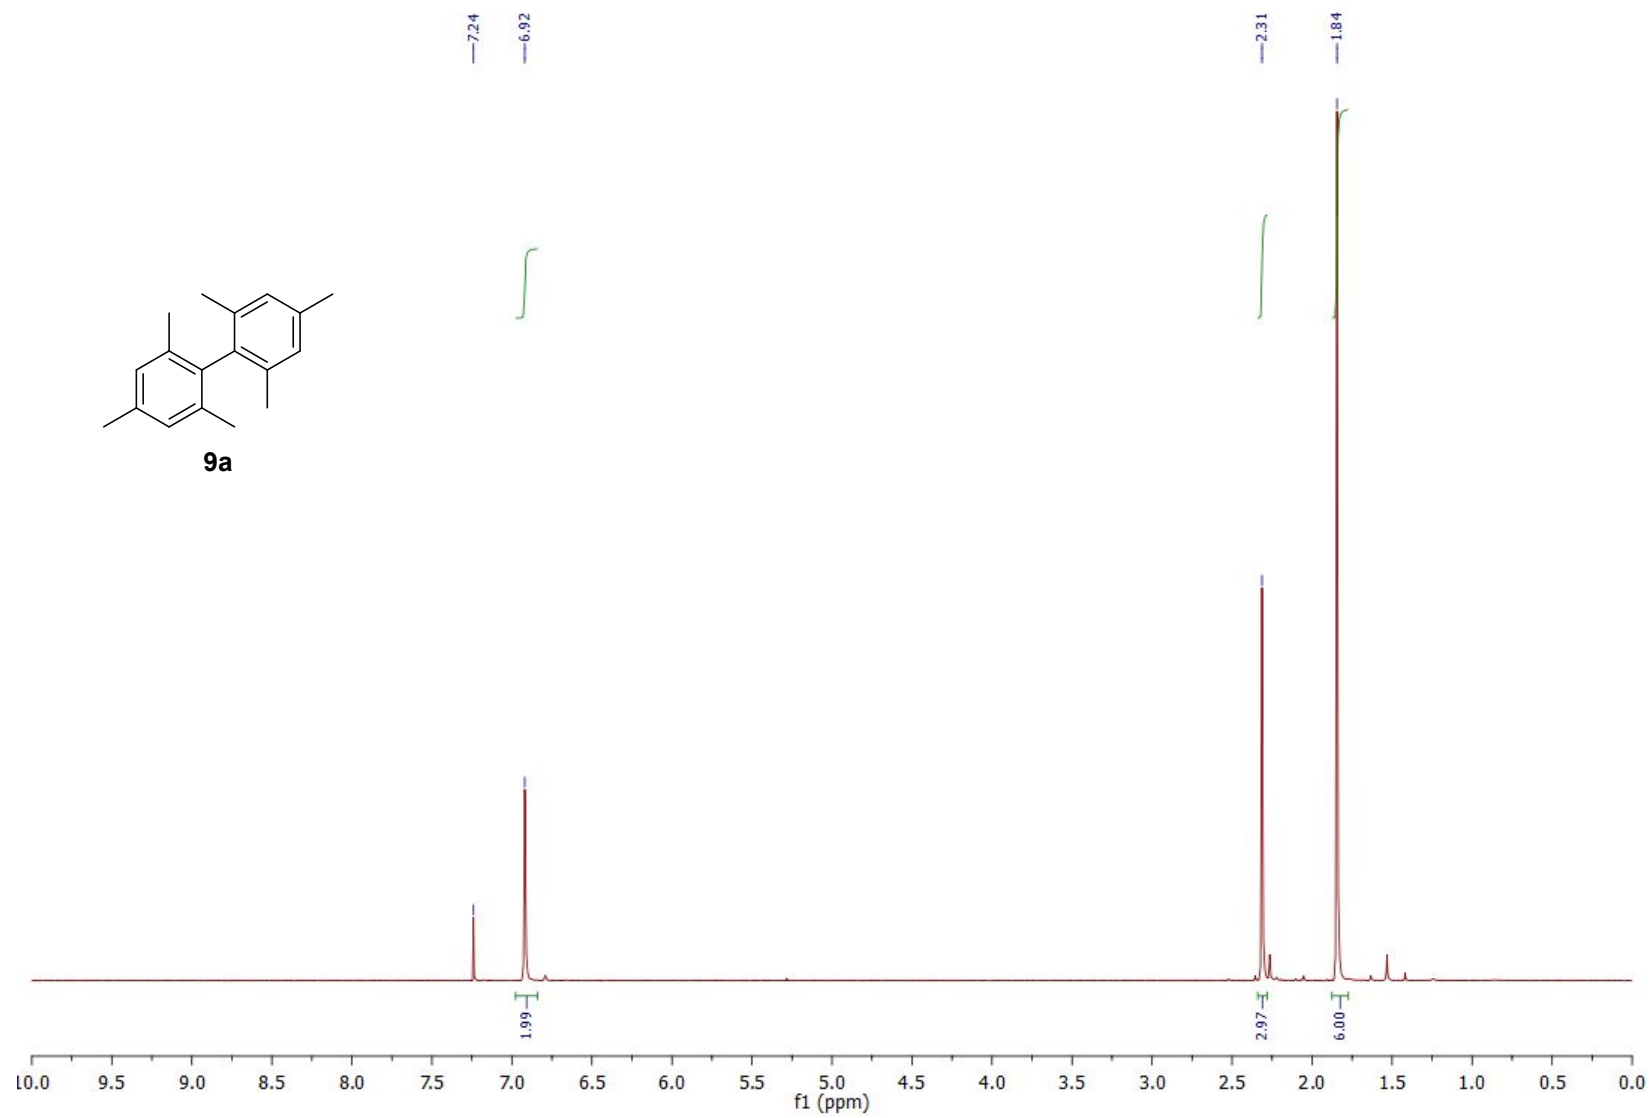

<sup>13</sup>C-NMR spectrum: **2,2',4,4',6,6'**-Hexamethylbiphenyl (**9a**)

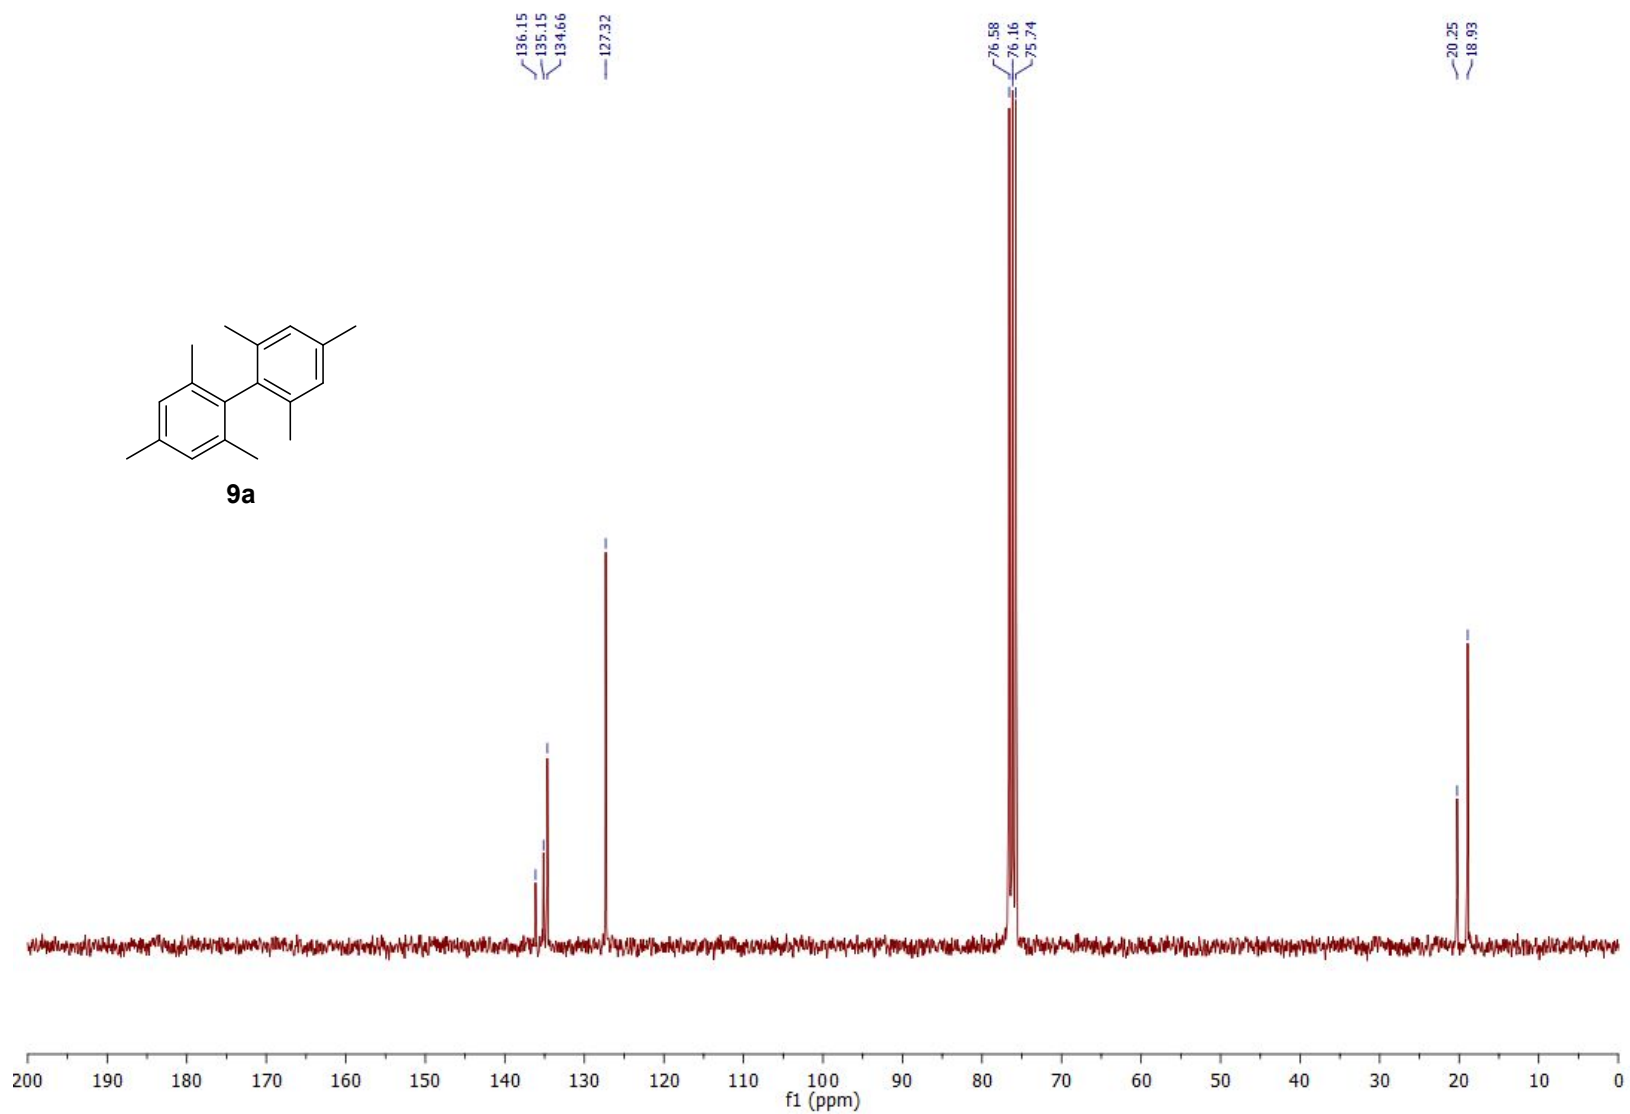

<sup>1</sup>H-NMR spectrum: **1,1'-Binaphthyl (10a)**

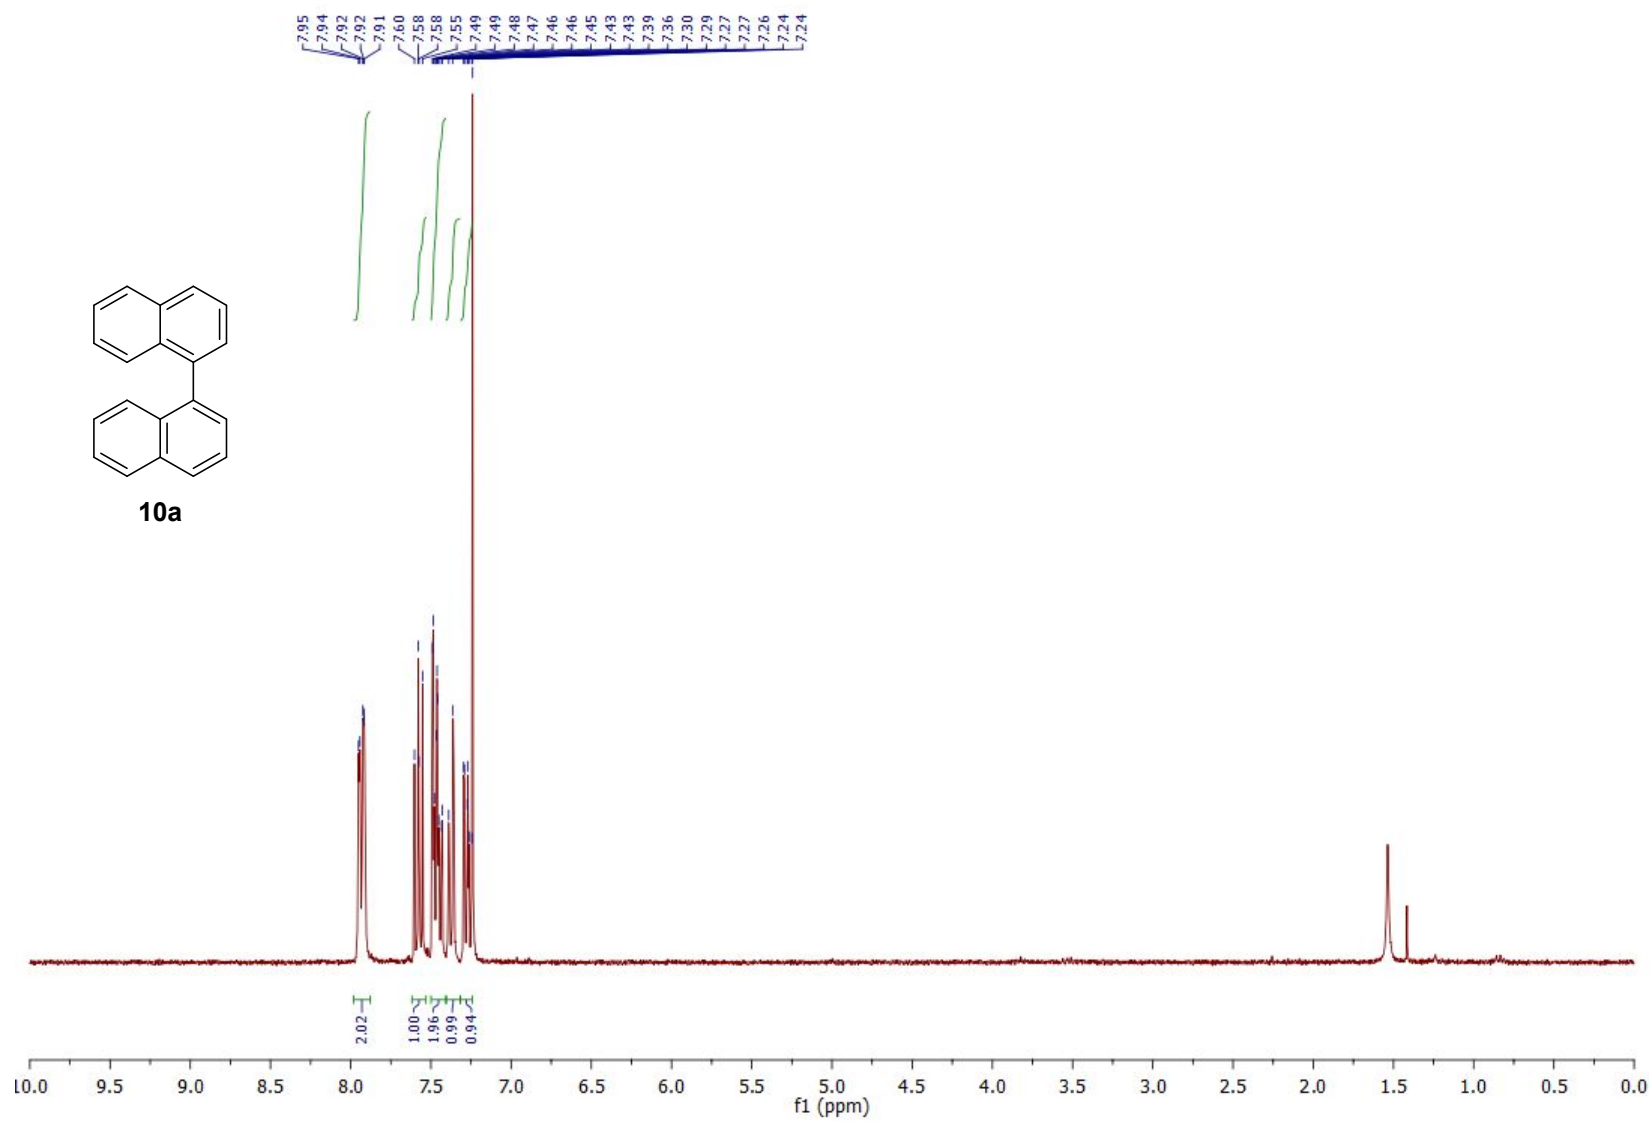

<sup>13</sup>C-NMR spectrum: **1,1'-Binaphthyl (10a)**

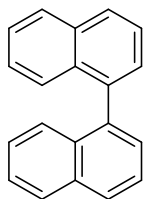

**10a**

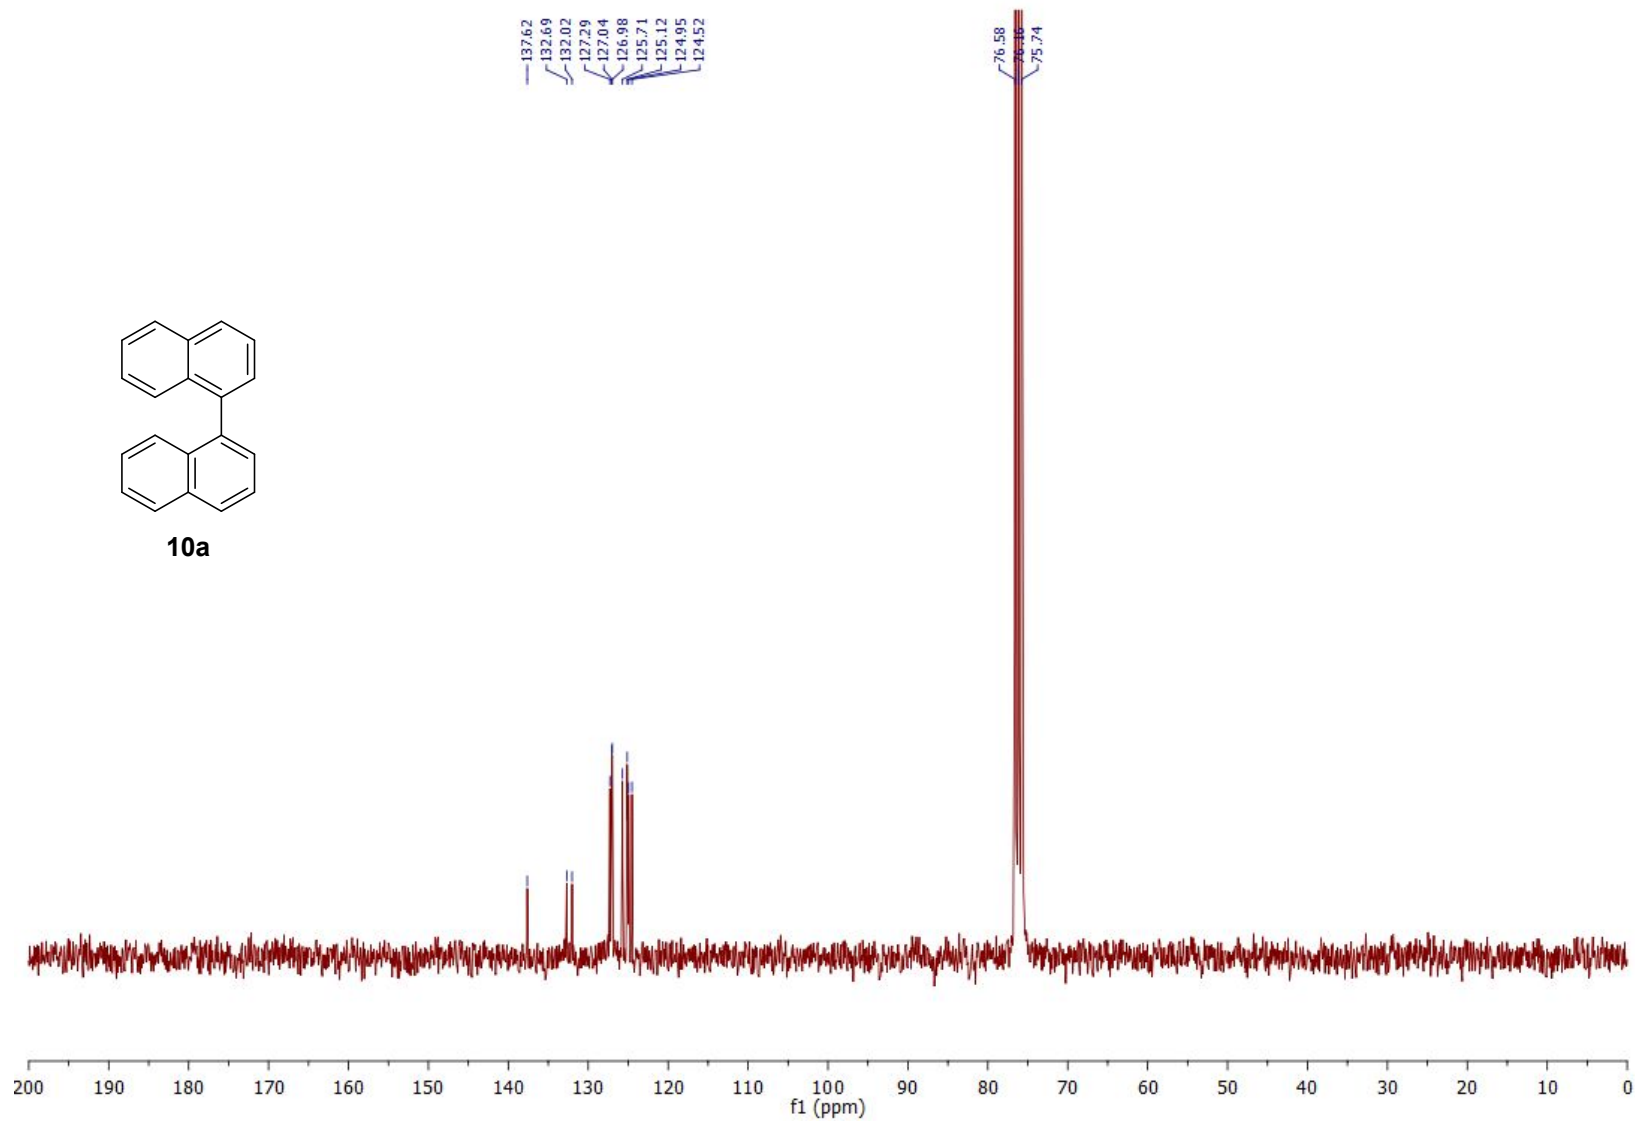

<sup>1</sup>H-NMR spectrum: **2,2'-binaphthyl (11a)**

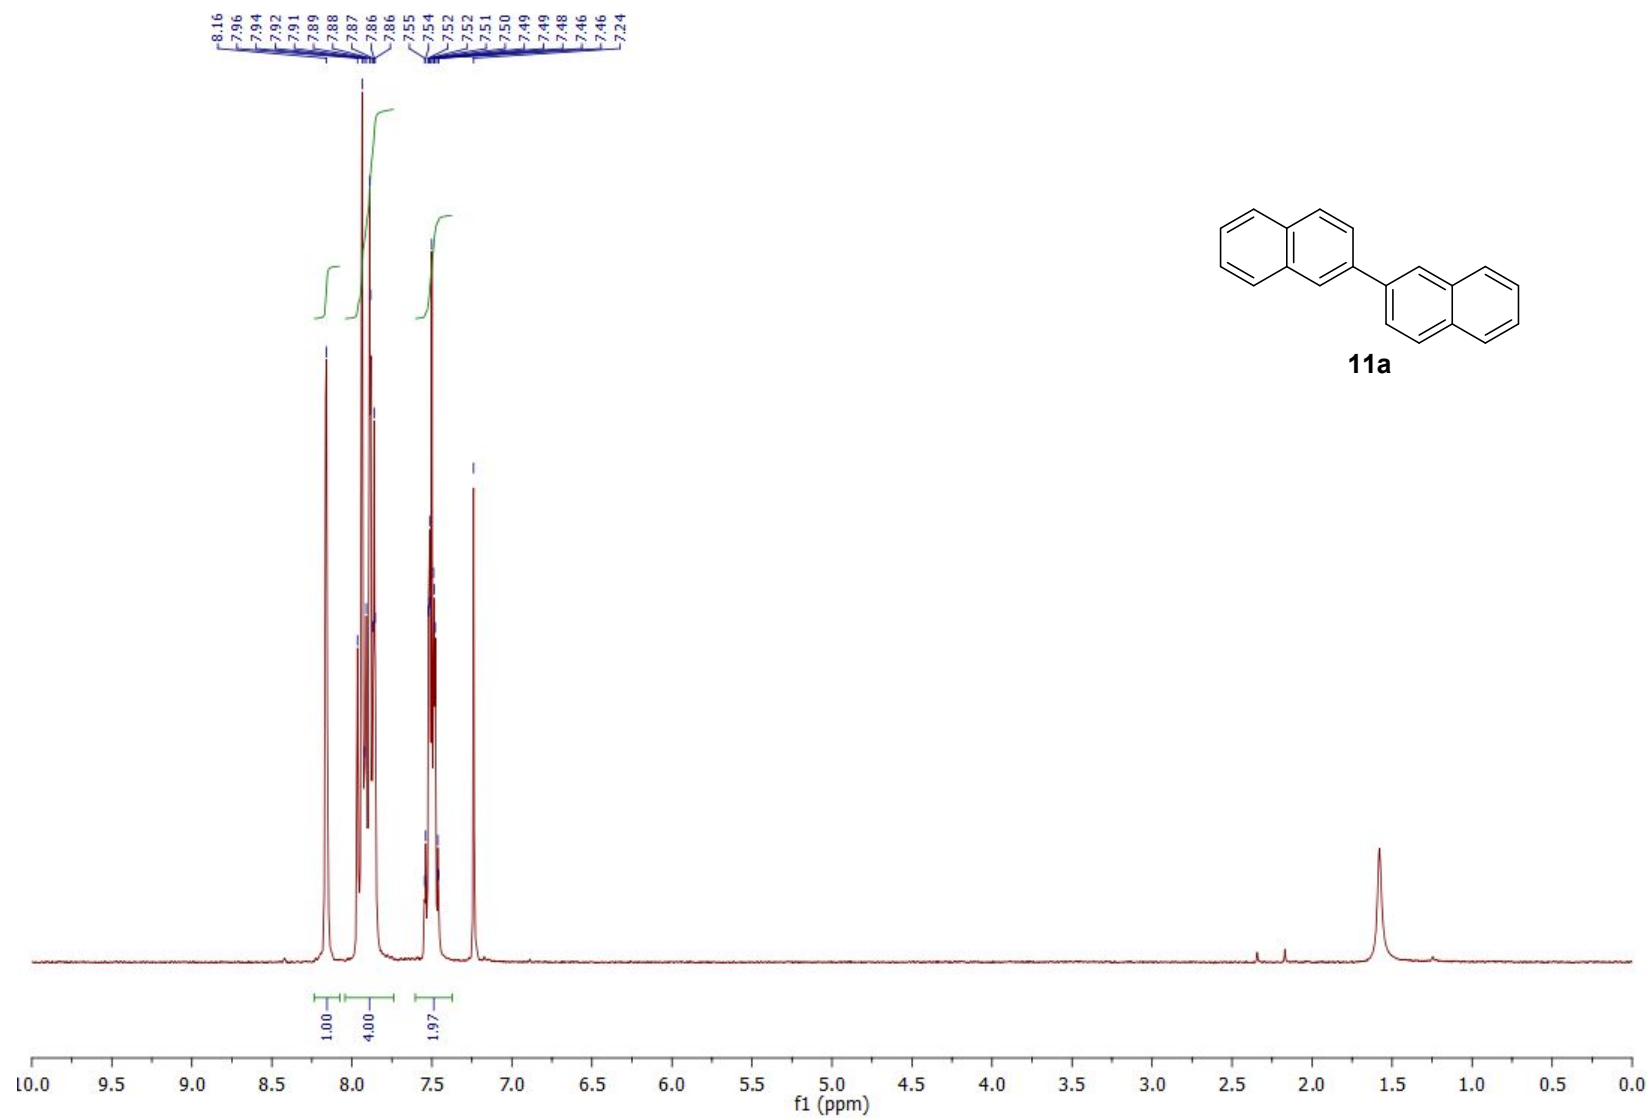

<sup>13</sup>C-NMR spectrum: **2,2'-binaphthyl (11a)**

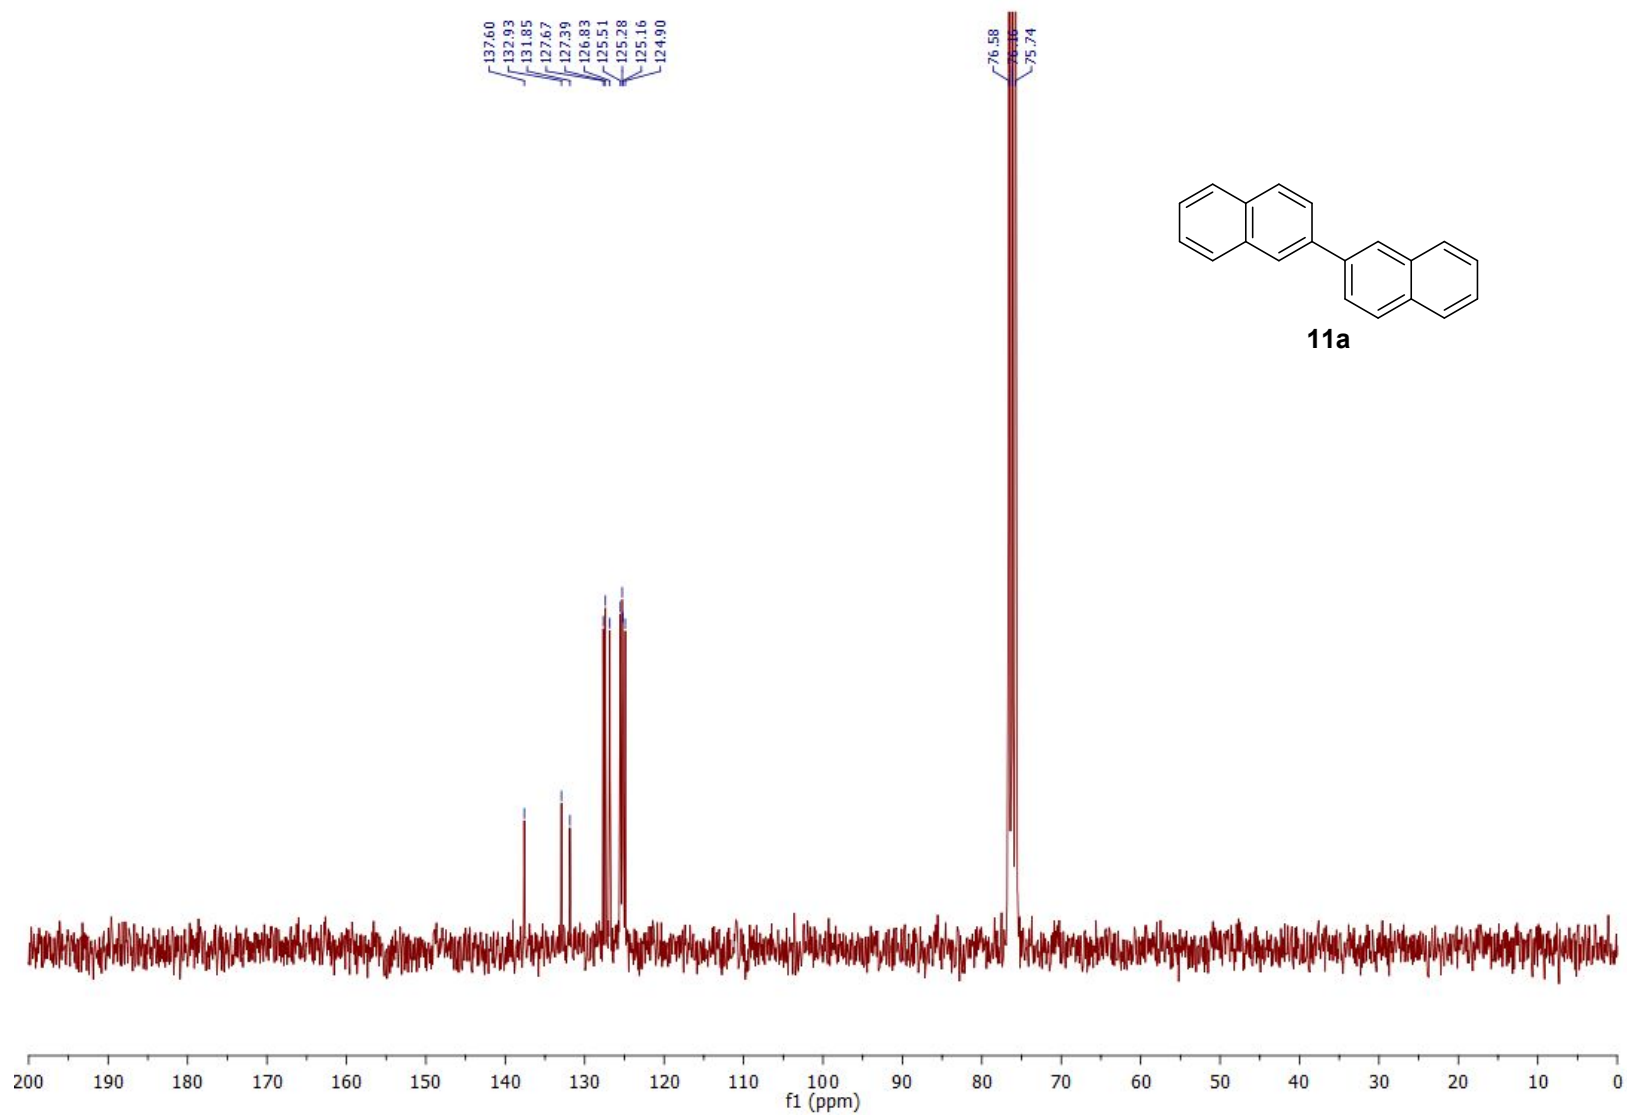

<sup>1</sup>H-NMR spectrum: **1-(Pentafluorophenyl)-octan-1-one (12)**

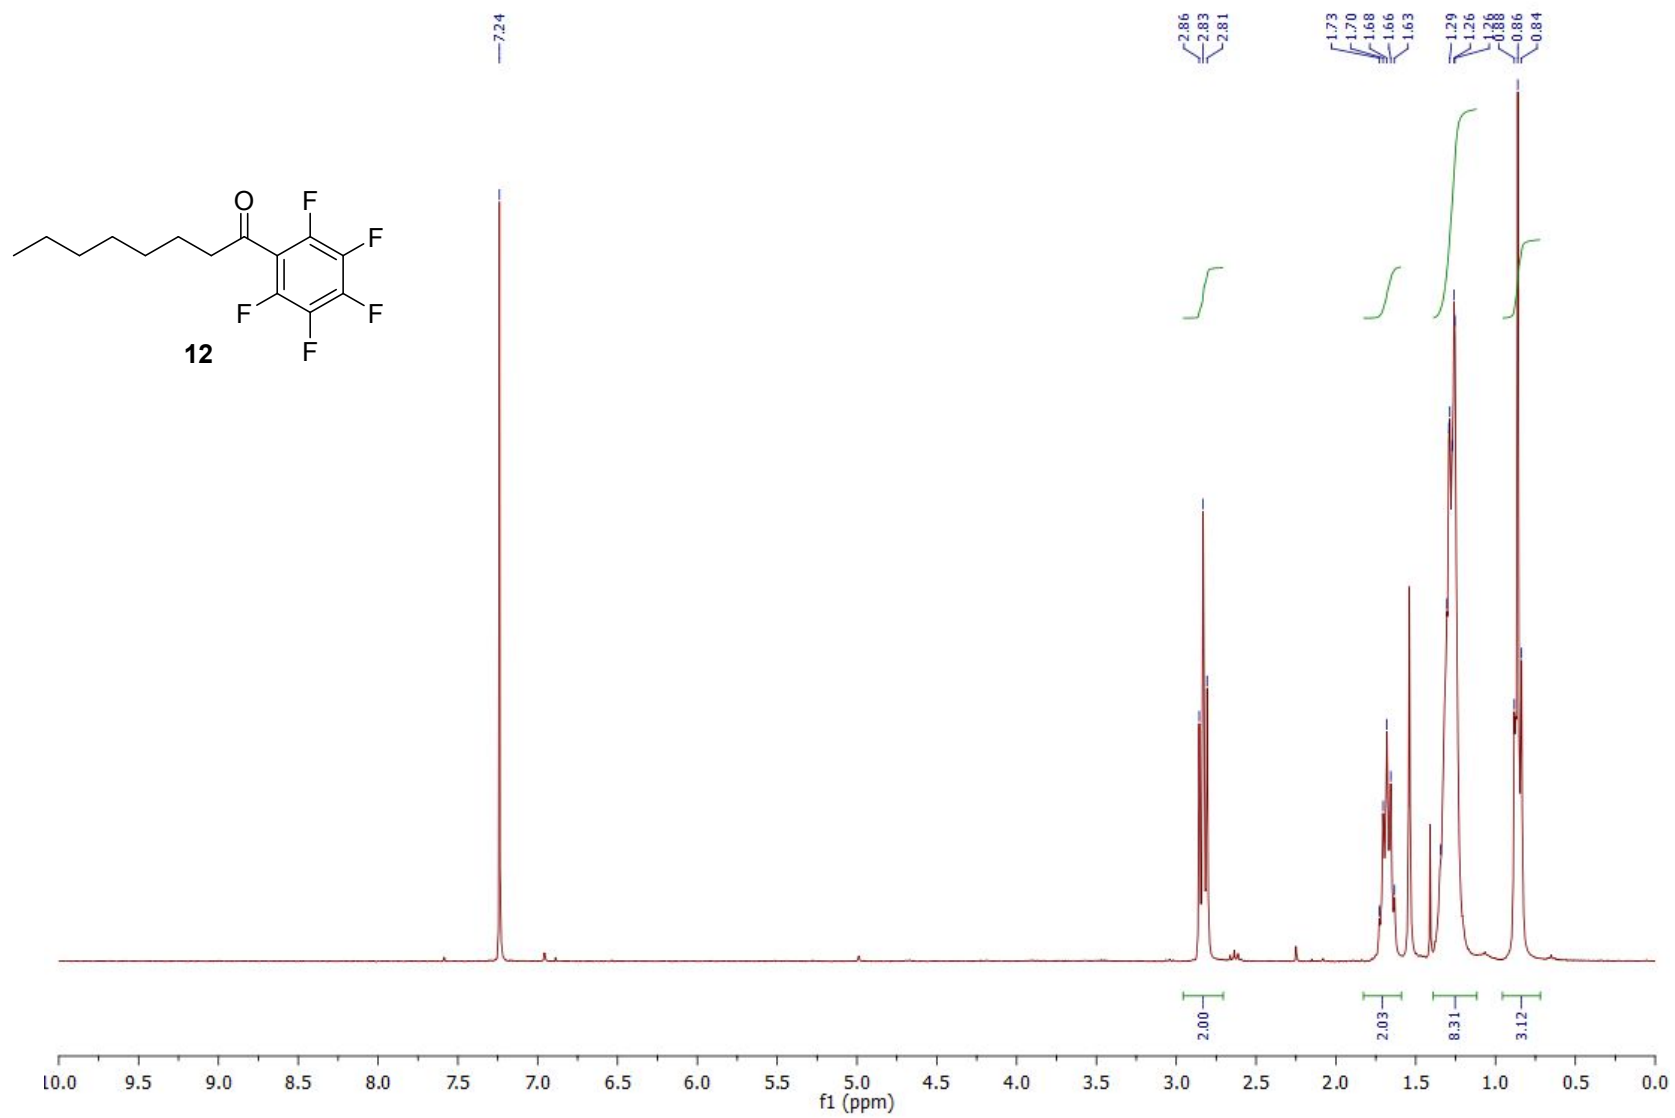



<sup>13</sup>C-NMR spectrum: **1-(Pentafluorophenyl)-octan-1-one (12)**

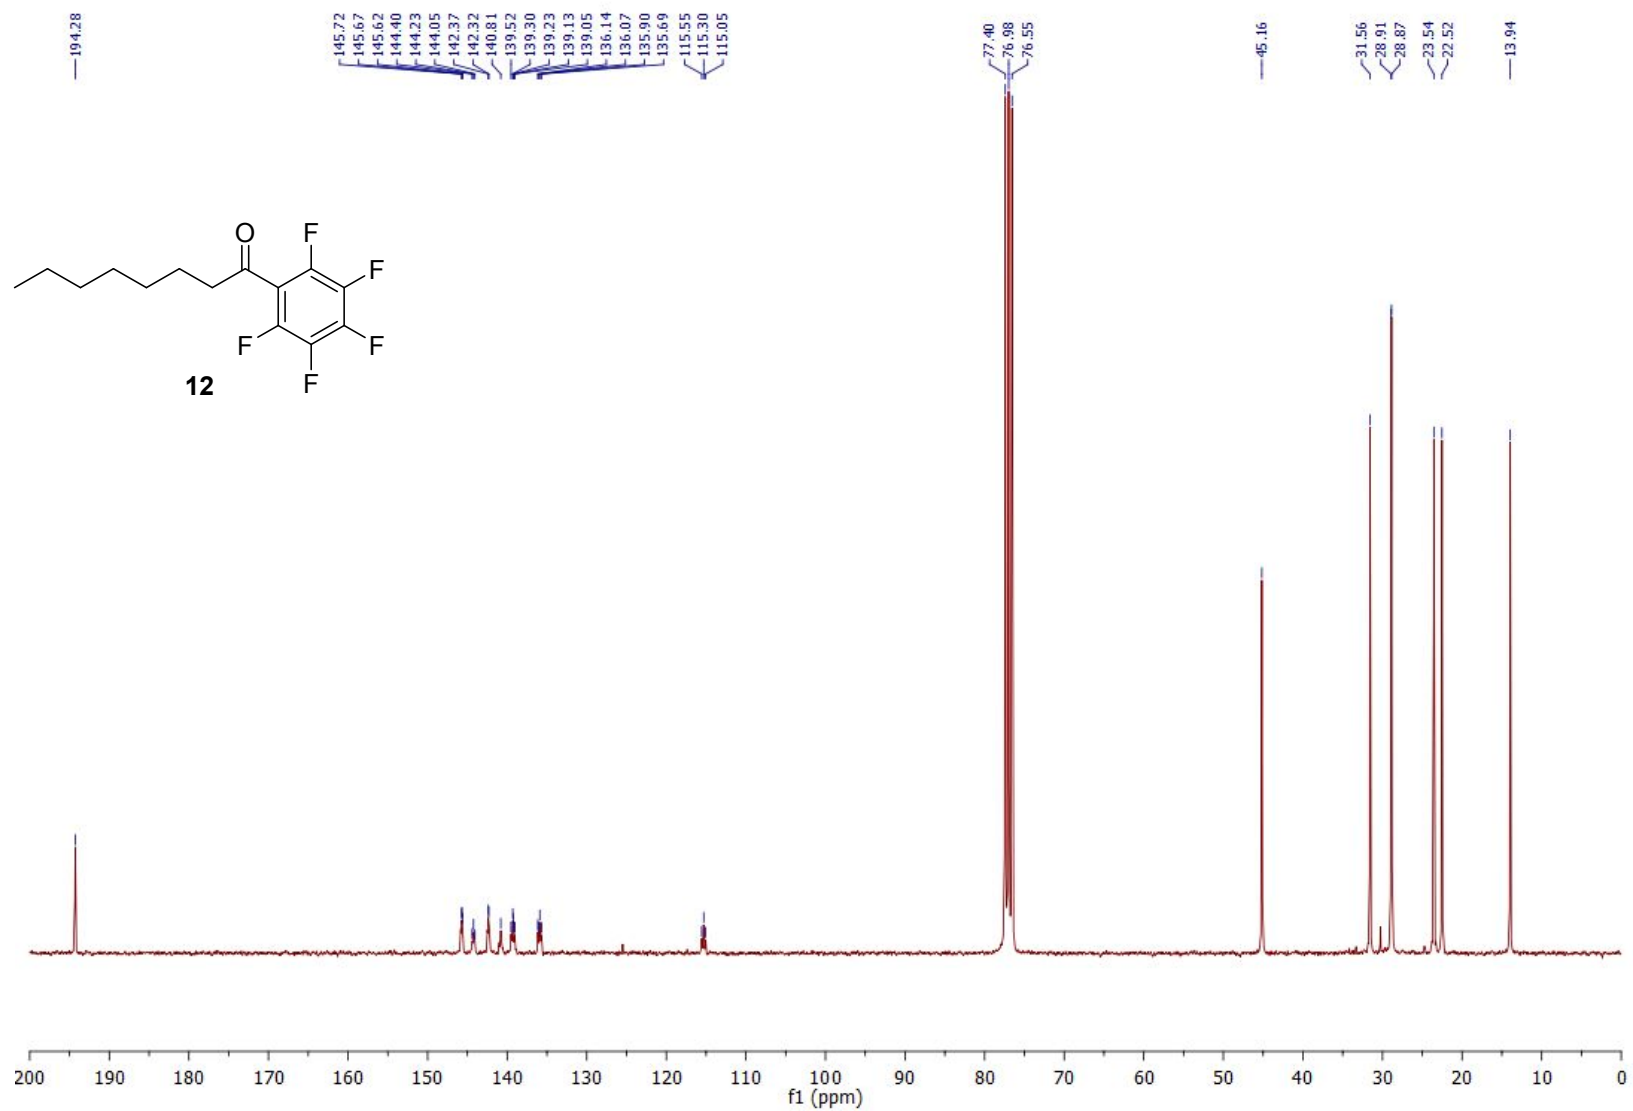

<sup>19</sup>F-NMR spectrum: **1-(Pentafluorophenyl)-octan-1-one (12)**

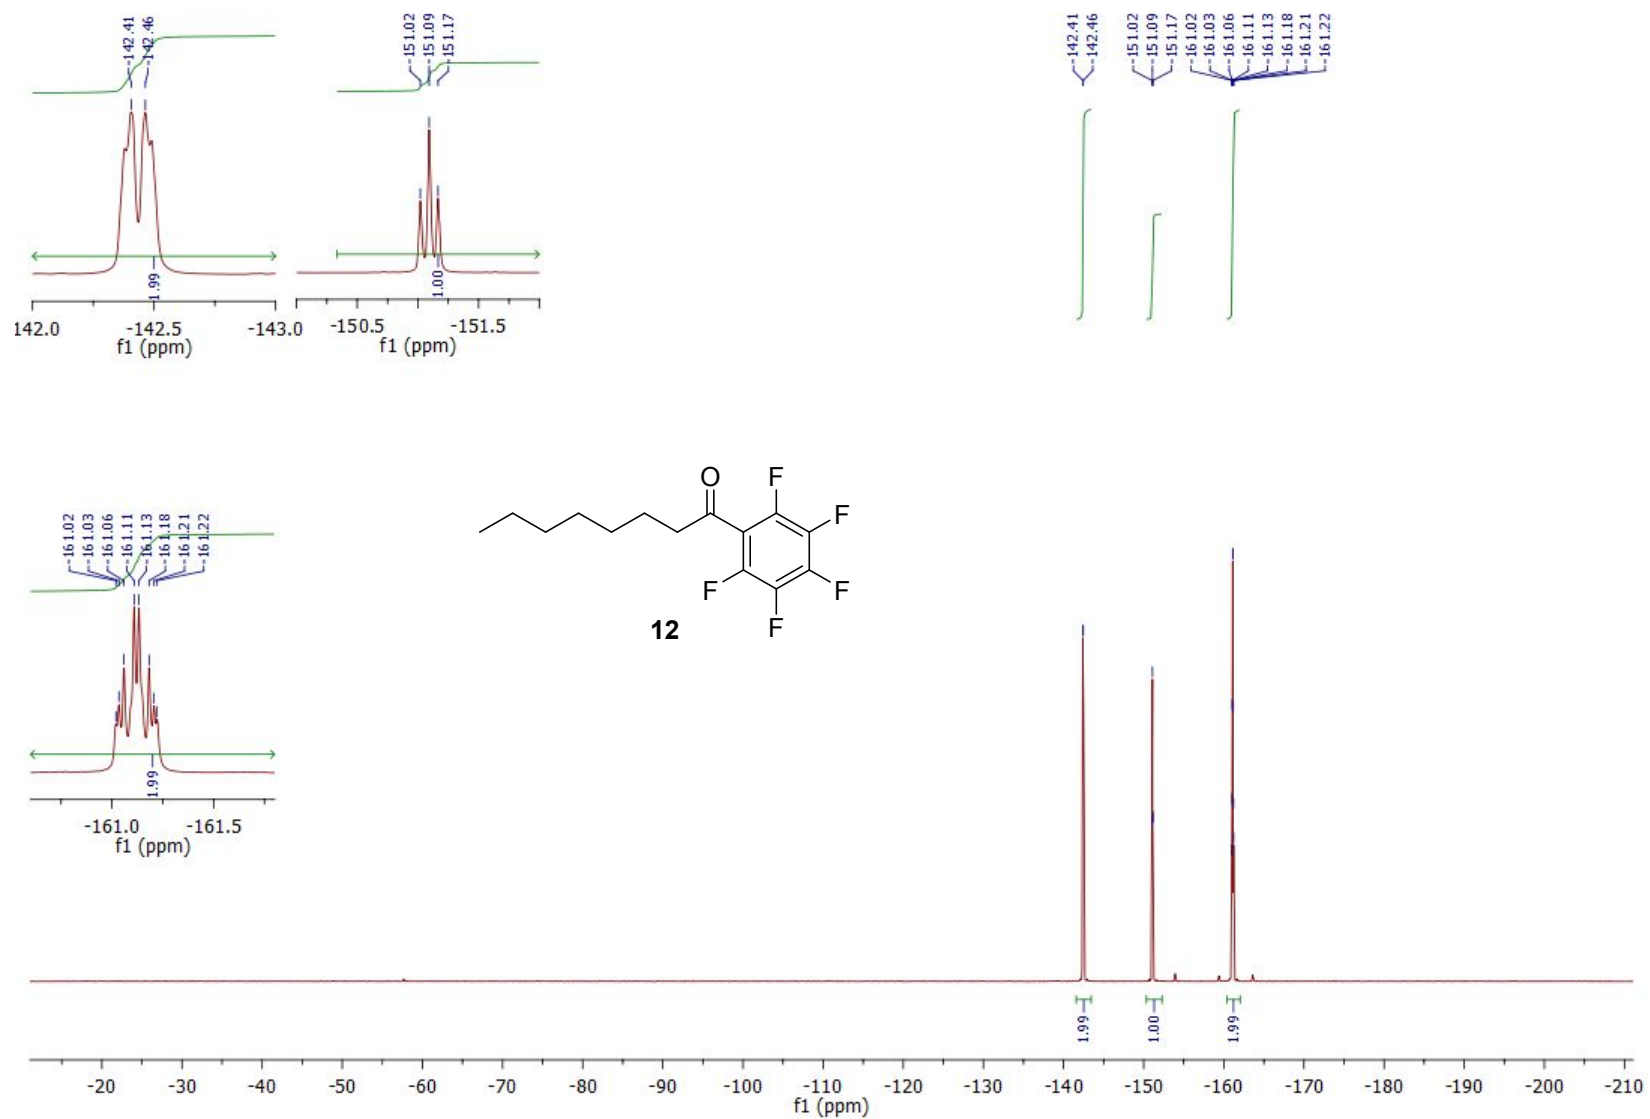

<sup>1</sup>H-NMR spectrum: **Pentafluorobenzene (13)**

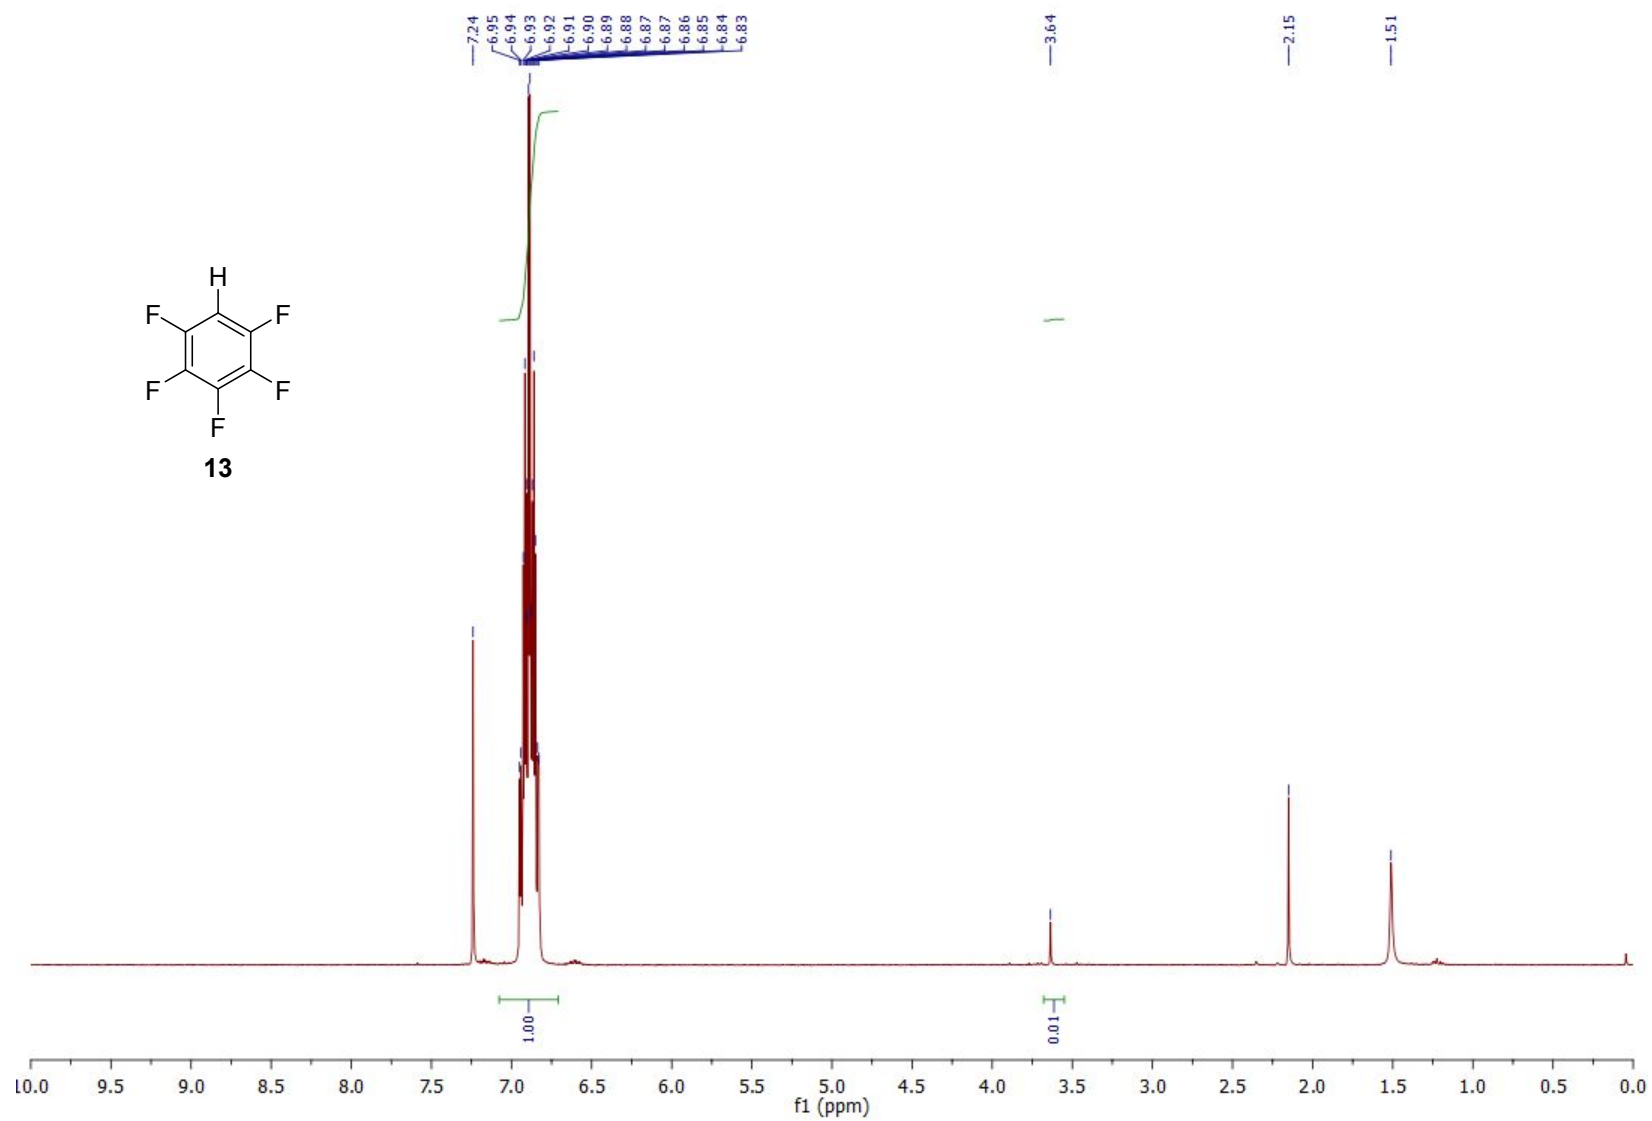

<sup>13</sup>C-NMR spectrum: **Pentafluorobenzene (13)**

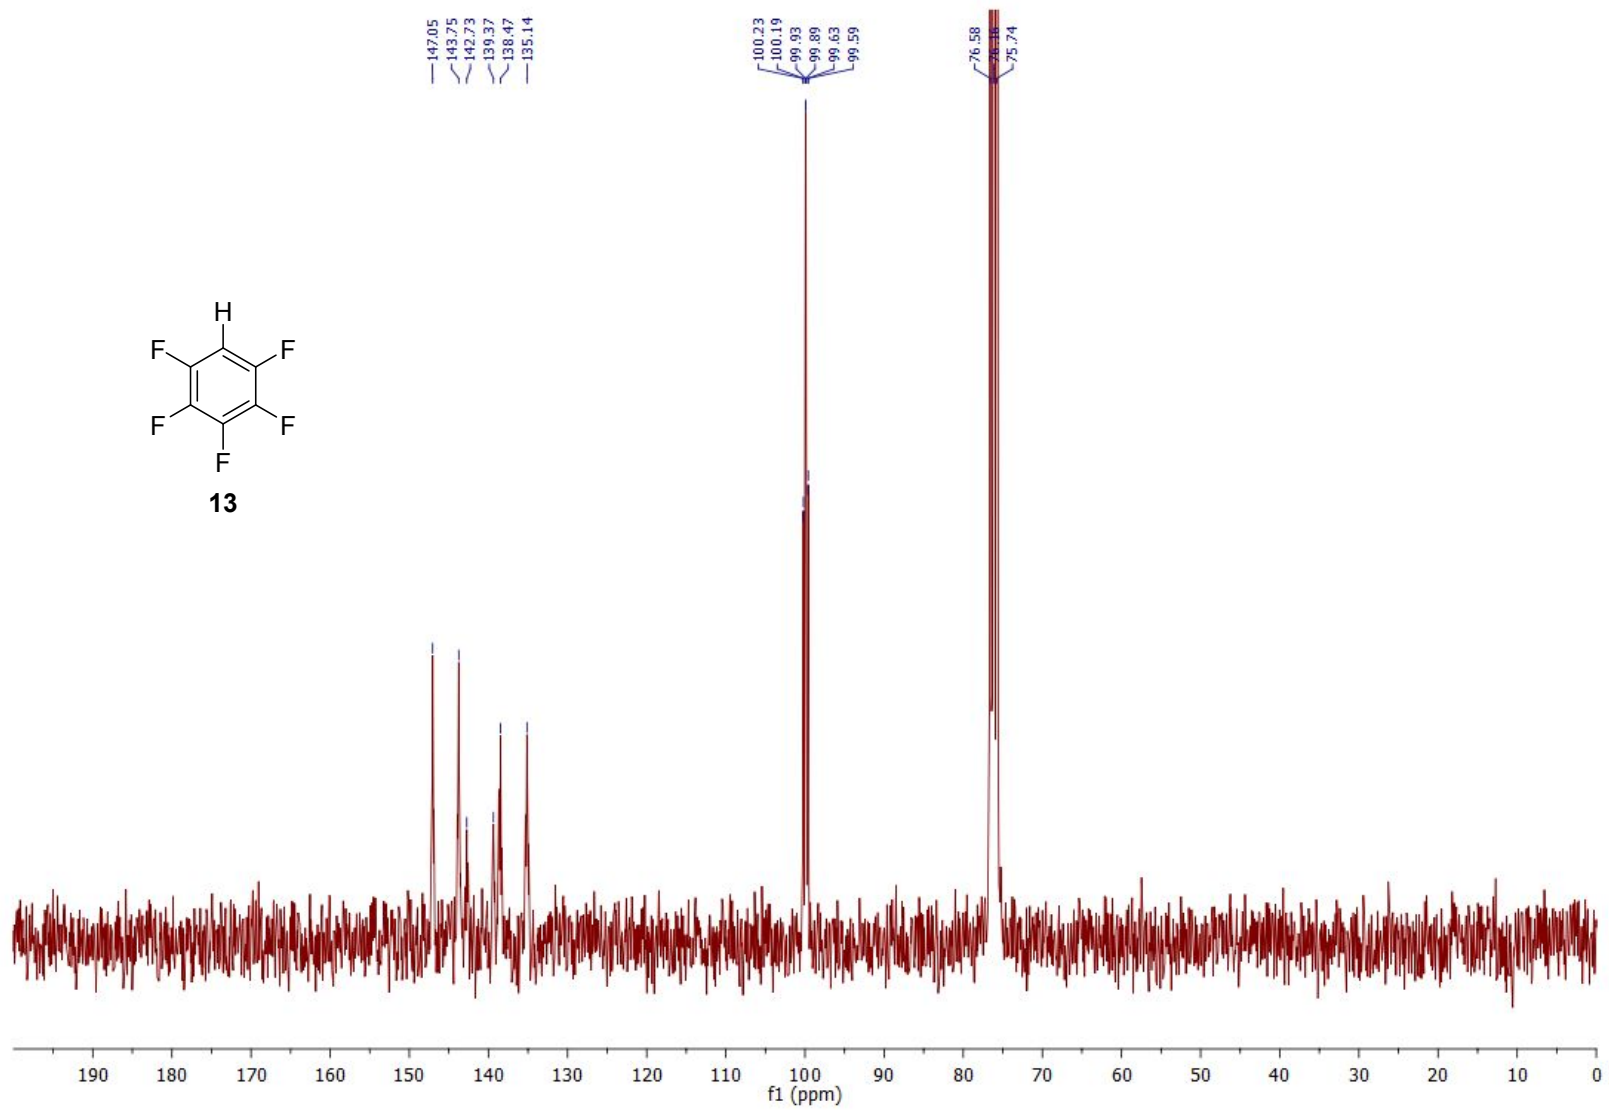

<sup>19</sup>F-NMR spectrum: Pentafluorobenzene (13)

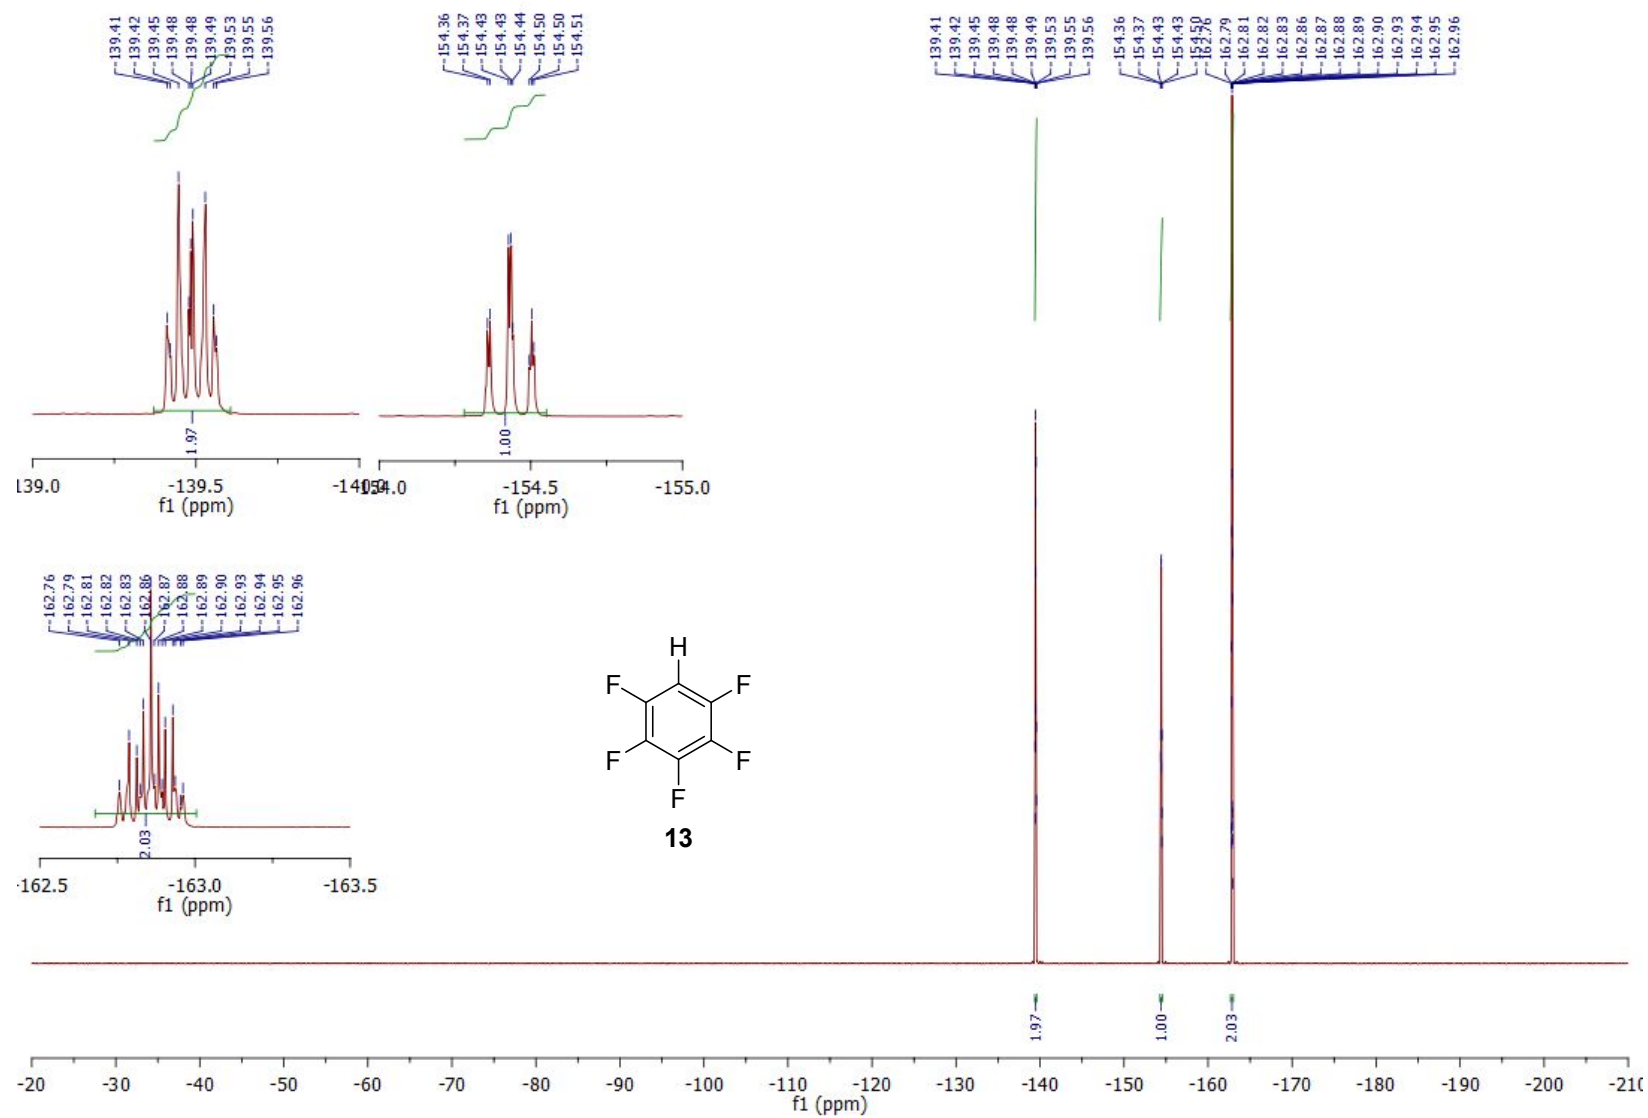

<sup>13</sup>C-NMR spectrum: **Iodopentafluorobenzene (14)**

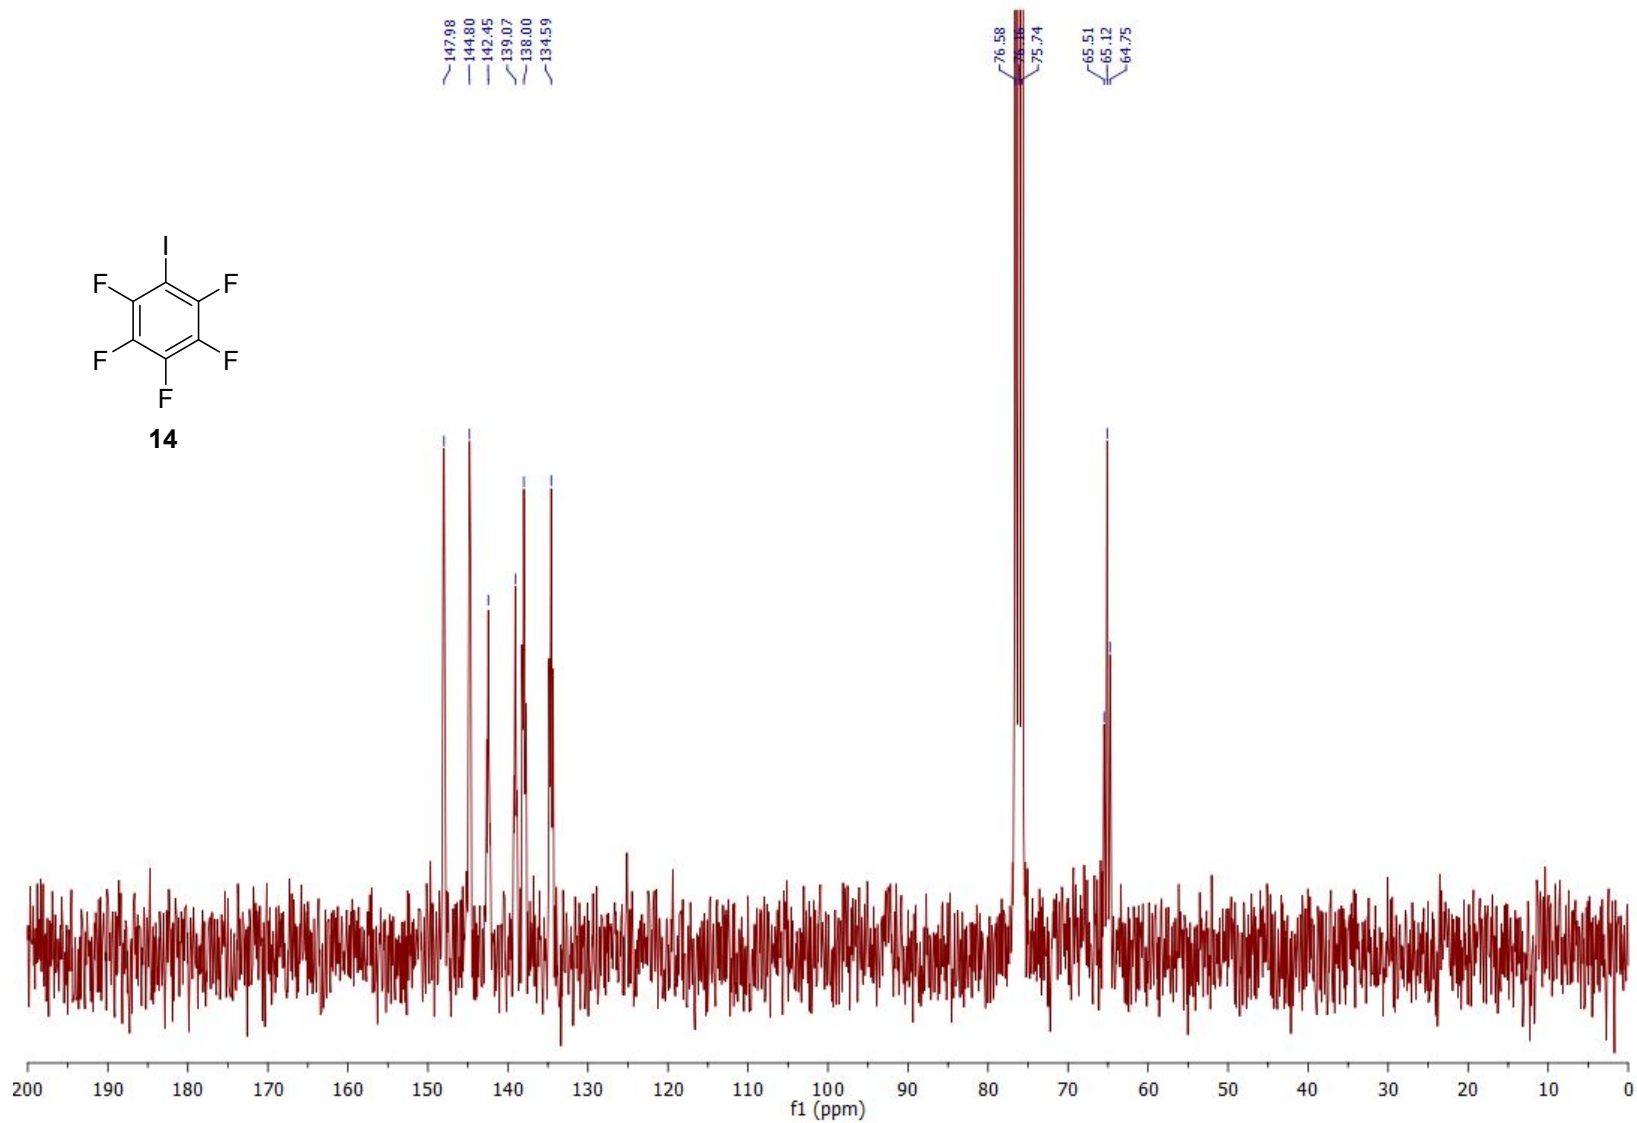

<sup>19</sup>F-NMR spectrum: **Iodopentafluorobenzene (14)**

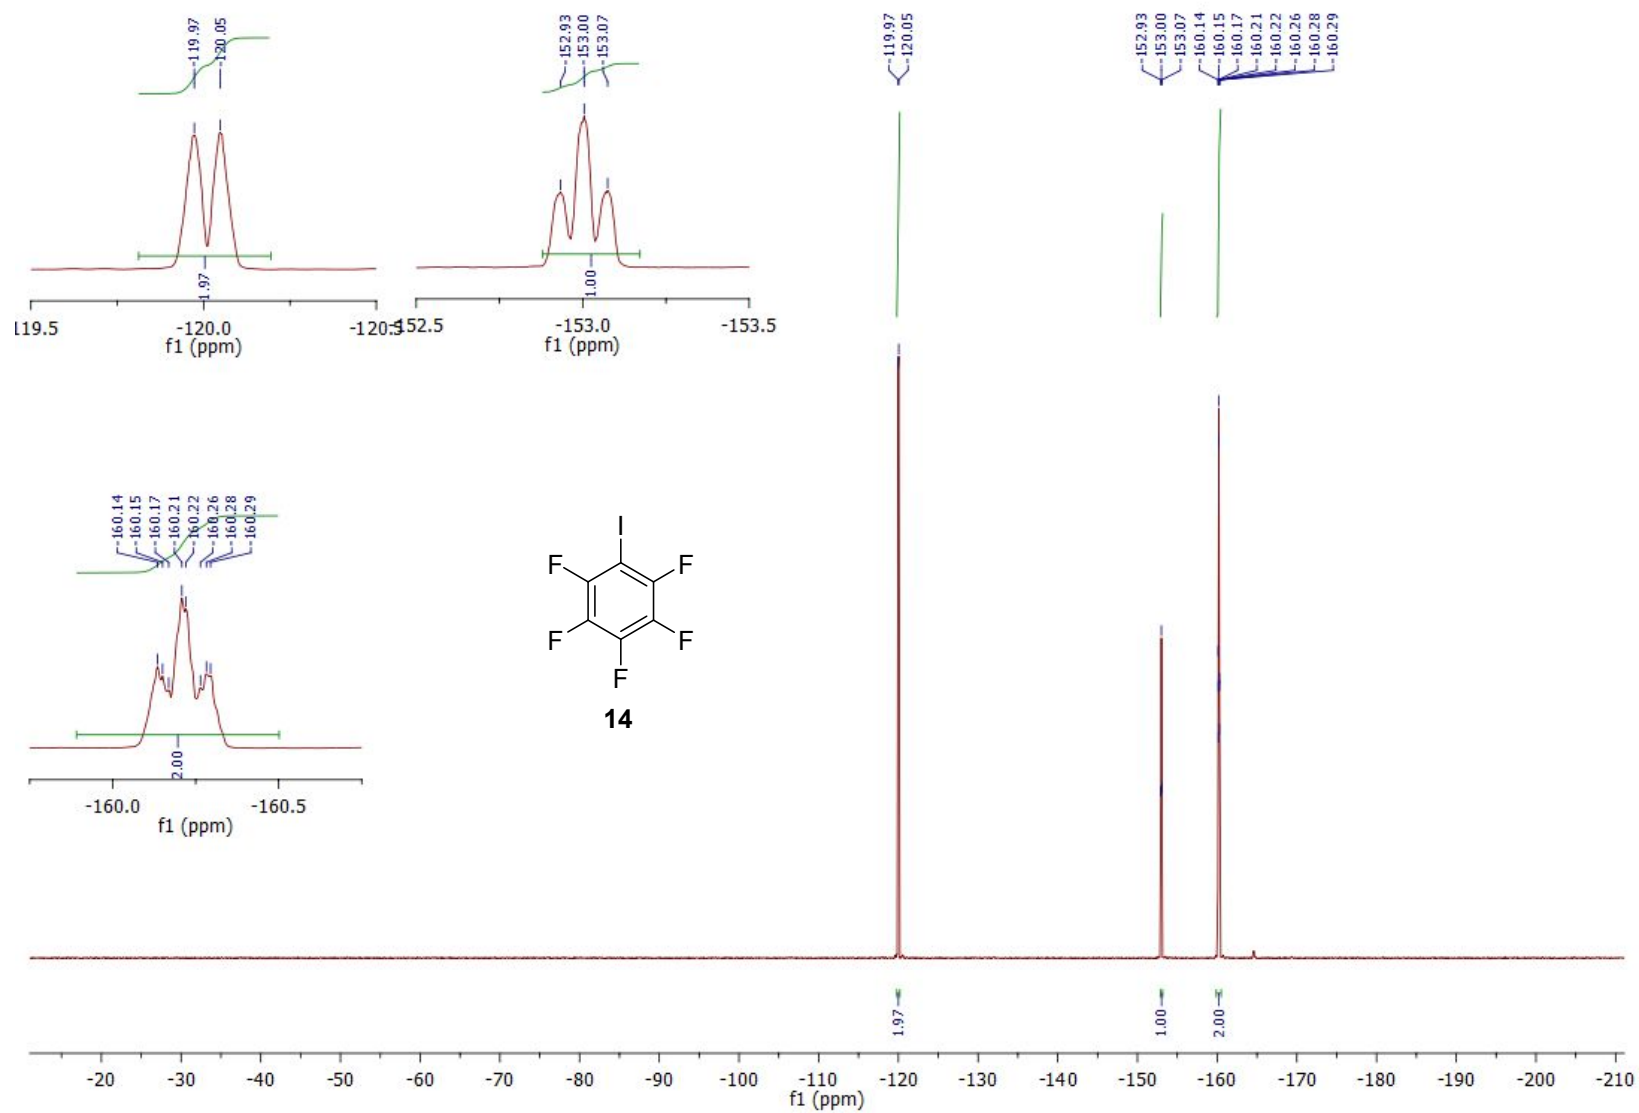

<sup>13</sup>C-NMR spectrum: **Decafluorobiphenyl (15)**

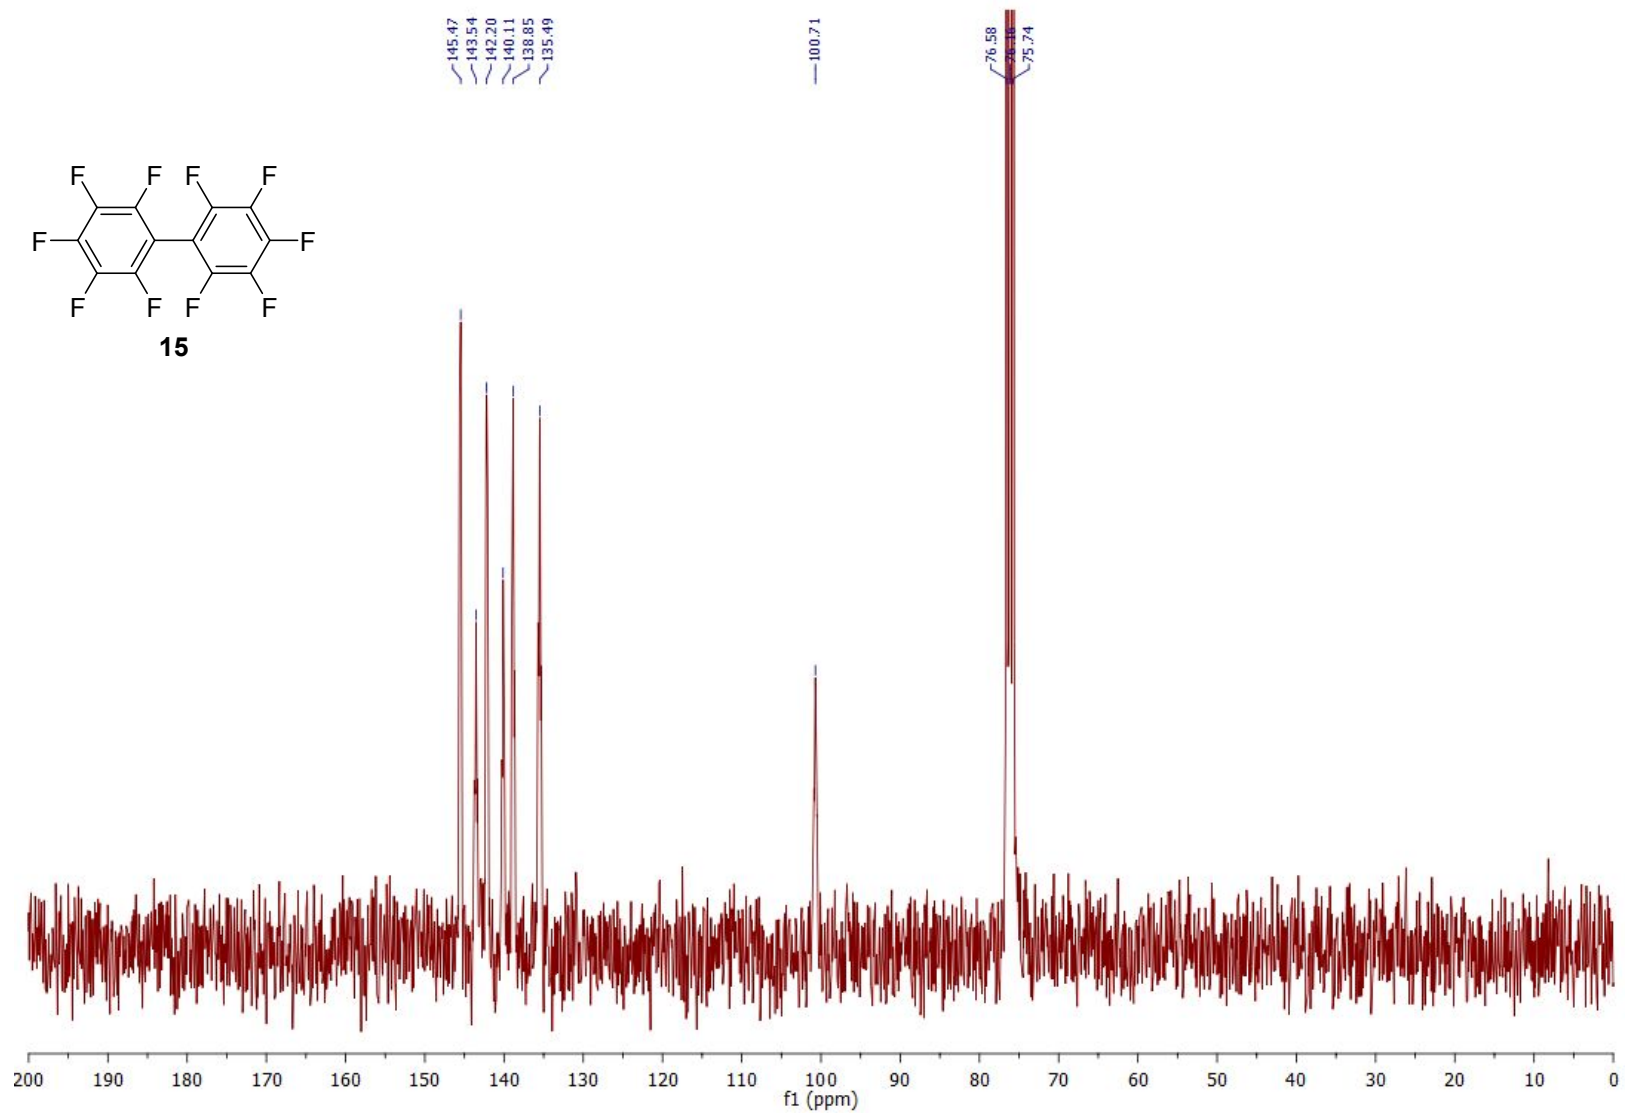



<sup>19</sup>F-NMR spectrum: Decafluorobiphenyl (15)

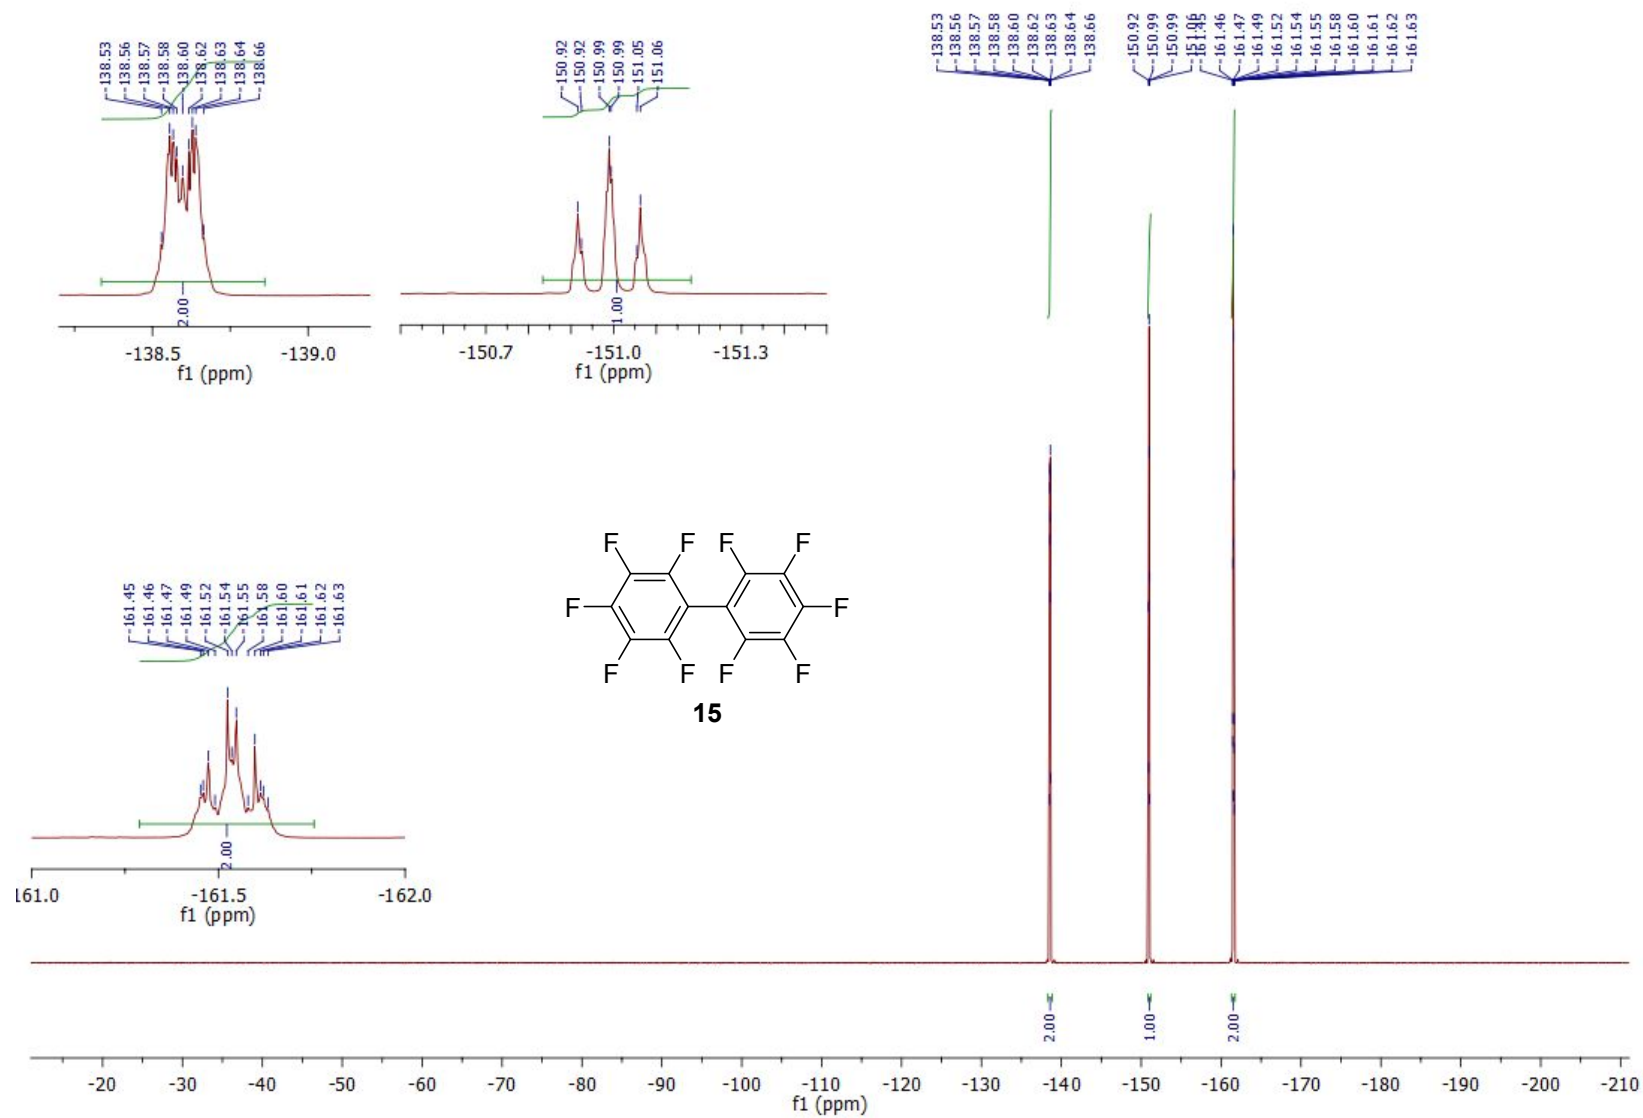

## 5. DFT calculations.

This computational work was carried out using the Gaussian09 code,<sup>14</sup> and OPBE functional was chosen, since it proved to efficiently reproduce both electronic and thermic properties of iron complexes, regardless of their oxidation and spin states.<sup>15-17</sup> Implicit PCM solvation model<sup>18,19</sup> was associated with explicit solvation of the magnesium adducts by THF molecules. Unless specified otherwise, all energies and cartesian coordinates discussed in this section were computed using SDD basis set and pseudo-potential for Fe.

### Full surface for the reductive elimination of Ph-(2-Py) from $[\text{Ph}_2(2\text{-Py})\text{Fe}^{\text{II}}]^-$

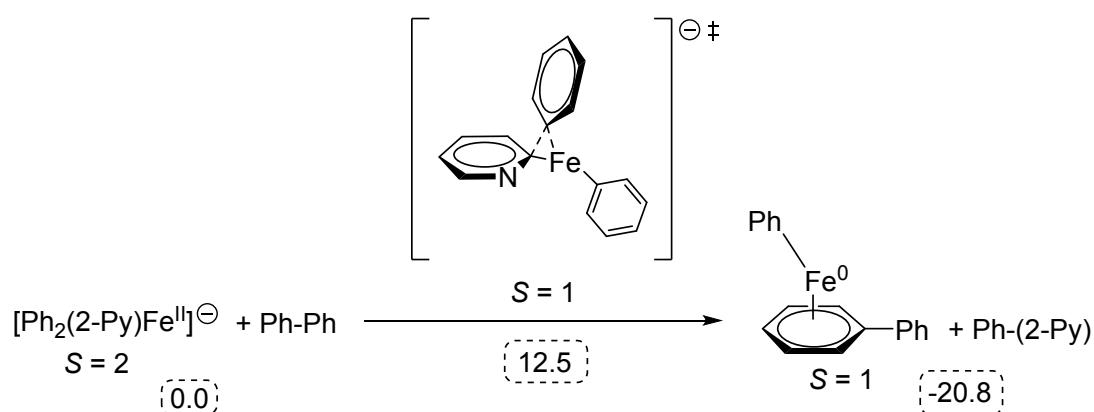

Figure S1: DFT-computed surface for the reductive elimination of Ph-(2-Py) starting from *ate* complex  $[\text{Ph}_2(2\text{-Py})\text{Fe}^{\text{II}}]^-$ ; thermal energies given in kcal.mol<sup>-1</sup> (dashed squares)

### Full surface for the reductive elimination of Ph-(2-Py) from $\text{Ph}_3(2\text{-Py})\text{Fe}^{\text{II}}\text{Mg}(\text{THF})$

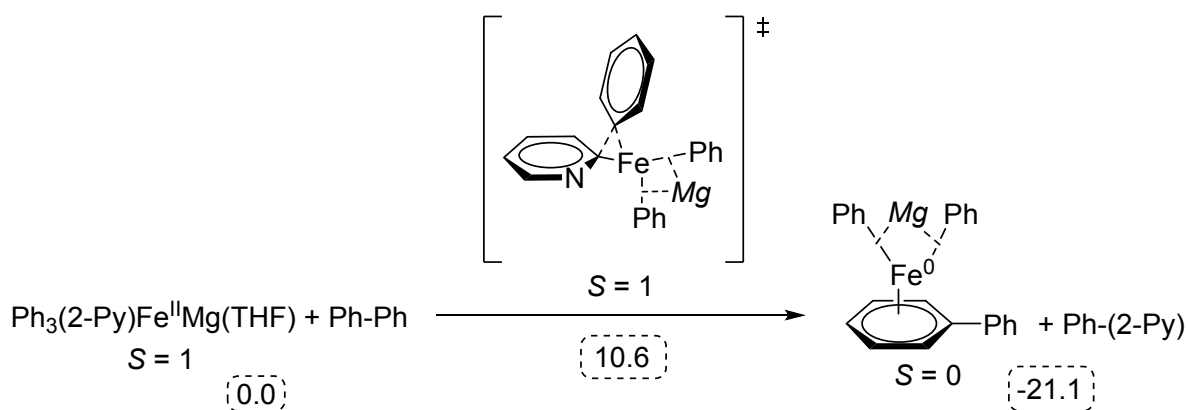

Figure S2: DFT-computed surface for the reductive elimination of Ph-(2-Py) starting from quaternized complex  $\text{Ph}_3(2\text{-Py})\text{Fe}^{\text{II}}\text{Mg}(\text{THF})$ ; thermal energies given in kcal.mol<sup>-1</sup> (dashed squares)

Table S1: Thermal activation energies of the cross- and homocoupling paths discussed in Scheme 5 of the article (def2TZVPP<sup>20,21</sup> was used as basis set and pseudo-potential for Fe)

|                                                | Path i                     | Path ii                    | Path iii                   | Path iv                    | Path v                     |
|------------------------------------------------|----------------------------|----------------------------|----------------------------|----------------------------|----------------------------|
|                                                | $\Delta E_{cc,t}^\ddagger$ | $\Delta E_{hc,t}^\ddagger$ | $\Delta E_{cc,q}^\ddagger$ | $\Delta E_{hc,q}^\ddagger$ | $\Delta E_{hc,t}^\ddagger$ |
| Ar = Ph<br>Ar' = C <sub>6</sub> F <sub>5</sub> | 27.7                       | 15.9                       | 19.4                       | 12.5                       | 15.9                       |
| Ar = Ph<br>Ar' = 2-Py                          | 10.8                       | 15.2                       | 14.6                       | 8.4                        |                            |

*Computed structures:*

**[Ph<sub>2</sub>Ar'Fe<sup>II</sup>]<sup>-</sup> (S = 2)**

**Ar' = 2-Py**

|    |              |              |              |
|----|--------------|--------------|--------------|
| Fe | 0.803271000  | -0.014616000 | -0.093964000 |
| C  | -0.168478000 | -1.714757000 | 0.554594000  |
| C  | -1.529398000 | -2.009619000 | 0.280080000  |
| C  | 0.519183000  | -2.715772000 | 1.290042000  |
| C  | -2.155589000 | -3.197268000 | 0.694202000  |
| H  | -2.135013000 | -1.287912000 | -0.278775000 |
| C  | -0.088391000 | -3.906040000 | 1.718849000  |
| H  | 1.575554000  | -2.567030000 | 1.540751000  |
| C  | -1.436076000 | -4.155331000 | 1.420532000  |
| H  | -3.208595000 | -3.375115000 | 0.452445000  |
| H  | 0.489027000  | -4.643518000 | 2.285991000  |
| C  | -0.056942000 | 1.712508000  | -0.758839000 |
| N  | -1.399225000 | 1.935500000  | -0.572455000 |
| C  | 0.710484000  | 2.730406000  | -1.397549000 |
| C  | -1.946266000 | 3.090562000  | -0.991083000 |
| C  | 0.131772000  | 3.924625000  | -1.830371000 |
| H  | 1.781606000  | 2.570867000  | -1.550884000 |
| C  | -1.242222000 | 4.119837000  | -1.624159000 |
| H  | -3.023173000 | 3.201462000  | -0.808385000 |
| H  | 0.734680000  | 4.695266000  | -2.321332000 |
| C  | 2.878195000  | -0.068282000 | -0.081323000 |
| C  | 3.643418000  | 0.422987000  | 1.005099000  |
| C  | 3.631156000  | -0.598864000 | -1.157542000 |
| C  | 5.047115000  | 0.387170000  | 1.027382000  |
| C  | 5.034797000  | -0.642079000 | -1.158583000 |
| C  | 5.751732000  | -0.147769000 | -0.060052000 |
| H  | 3.111318000  | -1.000570000 | -2.036556000 |
| H  | 5.594116000  | 0.776889000  | 1.891940000  |
| H  | 5.571962000  | -1.063014000 | -2.014612000 |
| H  | 6.844440000  | -0.178981000 | -0.051448000 |
| H  | -1.749359000 | 5.033897000  | -1.941430000 |
| H  | -1.916498000 | -5.080657000 | 1.749537000  |
| H  | 3.133817000  | 0.853538000  | 1.876428000  |

|                                                    |             |         |         |
|----------------------------------------------------|-------------|---------|---------|
| Sum of electronic and thermal Energies=            | -834.671638 |         |         |
| Sum of electronic and thermal Enthalpies=          | -834.670694 |         |         |
| Sum of electronic and thermal Free Energies=       | -834.742138 |         |         |
| Lowest vibration frequencies (/cm <sup>-1</sup> ): | 15.4032     | 27.3835 | 33.4799 |

**Ar' = C<sub>6</sub>F<sub>5</sub>**

|                                                    |              |              |              |
|----------------------------------------------------|--------------|--------------|--------------|
| Fe                                                 | 1.148491000  | -0.169099000 | -0.033863000 |
| C                                                  | 0.003696000  | -1.850658000 | 0.270983000  |
| C                                                  | -0.456599000 | -2.656345000 | -0.798457000 |
| C                                                  | -0.363725000 | -2.286149000 | 1.567019000  |
| C                                                  | -1.227844000 | -3.812282000 | -0.598012000 |
| H                                                  | -0.210958000 | -2.381507000 | -1.831387000 |
| C                                                  | -1.134389000 | -3.438632000 | 1.788283000  |
| H                                                  | -0.042075000 | -1.712826000 | 2.444892000  |
| C                                                  | -1.571565000 | -4.208431000 | 0.701642000  |
| H                                                  | -1.562950000 | -4.404987000 | -1.454869000 |
| H                                                  | -1.395880000 | -3.737646000 | 2.808048000  |
| C                                                  | 0.121941000  | 1.649862000  | -0.289572000 |
| C                                                  | -0.194067000 | 2.486382000  | 0.775371000  |
| C                                                  | -0.327431000 | 2.092158000  | -1.528895000 |
| C                                                  | -0.910782000 | 3.679647000  | 0.652443000  |
| F                                                  | 0.205883000  | 2.150828000  | 2.040329000  |
| C                                                  | -1.048573000 | 3.272439000  | -1.728443000 |
| F                                                  | -0.066057000 | 1.348920000  | -2.647590000 |
| C                                                  | -1.341767000 | 4.072462000  | -0.619030000 |
| F                                                  | -1.201281000 | 4.461520000  | 1.716242000  |
| F                                                  | -1.471036000 | 3.663495000  | -2.951662000 |
| C                                                  | 3.186080000  | -0.223830000 | -0.066496000 |
| C                                                  | 3.991804000  | 0.939526000  | -0.167870000 |
| C                                                  | 3.902571000  | -1.446086000 | 0.013951000  |
| C                                                  | 5.395760000  | 0.896213000  | -0.186590000 |
| C                                                  | 5.303837000  | -1.509884000 | -0.004054000 |
| C                                                  | 6.061740000  | -0.333580000 | -0.104121000 |
| H                                                  | 3.350570000  | -2.389588000 | 0.092594000  |
| H                                                  | 5.971997000  | 1.823662000  | -0.265682000 |
| H                                                  | 5.809140000  | -2.478883000 | 0.060091000  |
| H                                                  | 7.153910000  | -0.376311000 | -0.118630000 |
| F                                                  | -2.035394000 | 5.215003000  | -0.774001000 |
| H                                                  | -2.172222000 | -5.106826000 | 0.865751000  |
| H                                                  | 3.513187000  | 1.923335000  | -0.235957000 |
| Sum of electronic and thermal Energies=            | -1314.614420 |              |              |
| Sum of electronic and thermal Enthalpies=          | -1314.613476 |              |              |
| Sum of electronic and thermal Free Energies=       | -1314.696273 |              |              |
| Lowest vibration frequencies (/cm <sup>-1</sup> ): | 15.4410      | 16.7344      | 19.9636      |

**Ar' = Ph**

|    |              |              |              |
|----|--------------|--------------|--------------|
| Fe | 1.024722000  | -0.097225000 | -0.114251000 |
| C  | -0.083176000 | -1.798804000 | 0.261728000  |

|                                                    |              |              |                                               |
|----------------------------------------------------|--------------|--------------|-----------------------------------------------|
| C                                                  | -1.243762000 | -2.165881000 | -0.467997000                                  |
| C                                                  | 0.226041000  | -2.651672000 | 1.353831000                                   |
| C                                                  | -2.028493000 | -3.284871000 | -0.147451000                                  |
| H                                                  | -1.556152000 | -1.556470000 | -1.324453000                                  |
| C                                                  | -0.548574000 | -3.771843000 | 1.697354000                                   |
| H                                                  | 1.110056000  | -2.443013000 | 1.968704000                                   |
| C                                                  | -1.683946000 | -4.096918000 | 0.943097000                                   |
| H                                                  | -2.912280000 | -3.525938000 | -0.747241000                                  |
| H                                                  | -0.265852000 | -4.395034000 | 2.552107000                                   |
| C                                                  | 0.052243000  | 1.697672000  | -0.465486000                                  |
| C                                                  | -0.601539000 | 2.420183000  | 0.563020000                                   |
| C                                                  | 0.007573000  | 2.299882000  | -1.747254000                                  |
| C                                                  | -1.246116000 | 3.647935000  | 0.341050000                                   |
| H                                                  | -0.615574000 | 2.017113000  | 1.583345000                                   |
| C                                                  | -0.636507000 | 3.523222000  | -1.993562000                                  |
| H                                                  | 0.495963000  | 1.804579000  | -2.595819000                                  |
| C                                                  | -1.266992000 | 4.206516000  | -0.944540000                                  |
| H                                                  | -1.735718000 | 4.170020000  | 1.169404000                                   |
| H                                                  | -0.644923000 | 3.947586000  | -3.002693000                                  |
| C                                                  | 3.077148000  | -0.105498000 | -0.046477000                                  |
| C                                                  | 3.835811000  | 1.091229000  | 0.056621000                                   |
| C                                                  | 3.854497000  | -1.290839000 | -0.139803000                                  |
| C                                                  | 5.238763000  | 1.111867000  | 0.077484000                                   |
| C                                                  | 5.259315000  | -1.292803000 | -0.124143000                                  |
| C                                                  | 5.963329000  | -0.086304000 | -0.012332000                                  |
| H                                                  | 3.349886000  | -2.260531000 | -0.224746000                                  |
| H                                                  | 5.771811000  | 2.064453000  | 0.164974000                                   |
| H                                                  | 5.807276000  | -2.238120000 | -0.197680000                                  |
| H                                                  | 7.056412000  | -0.078594000 | 0.005018000                                   |
| H                                                  | -1.767896000 | 5.161045000  | -1.126321000                                  |
| H                                                  | -2.290287000 | -4.969966000 | 1.198760000                                   |
| H                                                  | 3.313786000  | 2.052455000  | 0.127626000                                   |
| Sum of electronic and thermal Energies=            |              |              | -818.625934                                   |
| Sum of electronic and thermal Enthalpies=          |              |              | -818.624990                                   |
| Sum of electronic and thermal Free Energies=       |              |              | -818.695921                                   |
| Lowest vibration frequencies (/cm <sup>-1</sup> ): |              |              | 22.4152            27.0592            36.7050 |

**[Ph<sub>3</sub>Ar'<sup>II</sup>Fe<sup>II</sup>Mg(THF)] (S = 1)**

**Ar' = 2-Py**

|    |              |             |              |
|----|--------------|-------------|--------------|
| Fe | -0.785007000 | 0.024401000 | -1.218429000 |
| C  | 0.346485000  | 1.303966000 | -0.235661000 |
| C  | 1.717073000  | 1.054626000 | 0.050648000  |
| C  | -0.120137000 | 2.590553000 | 0.147354000  |
| C  | 2.544040000  | 1.994207000 | 0.681826000  |
| H  | 2.168179000  | 0.104385000 | -0.245857000 |
| C  | 0.702428000  | 3.544640000 | 0.764588000  |
| H  | -1.161189000 | 2.864709000 | -0.045367000 |

|    |              |              |              |
|----|--------------|--------------|--------------|
| C  | 2.043845000  | 3.252452000  | 1.047675000  |
| H  | 3.592410000  | 1.746812000  | 0.876756000  |
| H  | 0.290633000  | 4.524477000  | 1.027027000  |
| H  | 2.687622000  | 3.990987000  | 1.531388000  |
| C  | -0.467959000 | -2.120533000 | -0.958987000 |
| C  | -1.353410000 | -2.999407000 | -1.649471000 |
| C  | 0.739196000  | -2.740649000 | -0.520953000 |
| C  | -1.048317000 | -4.337834000 | -1.923325000 |
| H  | -2.312560000 | -2.613384000 | -2.008039000 |
| C  | 1.055607000  | -4.085954000 | -0.771082000 |
| H  | 1.482646000  | -2.151905000 | 0.028806000  |
| C  | 0.163298000  | -4.894278000 | -1.483752000 |
| H  | -1.758906000 | -4.955836000 | -2.480575000 |
| H  | 2.002680000  | -4.500009000 | -0.412008000 |
| H  | 0.402821000  | -5.939886000 | -1.691073000 |
| C  | 0.179418000  | 0.309119000  | -2.900725000 |
| C  | -0.271411000 | 1.333336000  | -3.769991000 |
| C  | 1.292982000  | -0.434885000 | -3.355373000 |
| C  | 0.338585000  | 1.594607000  | -5.006341000 |
| H  | -1.127013000 | 1.953401000  | -3.482435000 |
| C  | 1.914240000  | -0.182856000 | -4.587980000 |
| H  | 1.687392000  | -1.245964000 | -2.738883000 |
| C  | 1.440735000  | 0.835931000  | -5.425539000 |
| H  | -0.047601000 | 2.395131000  | -5.645254000 |
| H  | 2.770984000  | -0.789656000 | -4.898584000 |
| H  | 1.919975000  | 1.034479000  | -6.387525000 |
| C  | -2.513589000 | 0.358496000  | -0.283154000 |
| N  | -2.785526000 | 0.155694000  | -1.596858000 |
| C  | -3.514236000 | 0.940656000  | 0.535083000  |
| C  | -3.949390000 | 0.483479000  | -2.157111000 |
| C  | -4.763277000 | 1.246719000  | -0.026884000 |
| H  | -3.329704000 | 1.145511000  | 1.592960000  |
| C  | -4.999040000 | 1.015464000  | -1.386947000 |
| H  | -4.053254000 | 0.308625000  | -3.231905000 |
| H  | -5.553505000 | 1.671074000  | 0.598238000  |
| H  | -5.961817000 | 1.240745000  | -1.846849000 |
| Mg | -1.131424000 | -1.083710000 | 0.937839000  |
| C  | -0.858526000 | -1.696321000 | 4.027484000  |
| C  | -2.628468000 | -2.937791000 | 3.017165000  |
| C  | -1.340108000 | -2.760604000 | 4.999100000  |
| H  | -1.119709000 | -0.680581000 | 4.361192000  |
| H  | 0.217239000  | -1.744369000 | 3.812919000  |
| C  | -2.772555000 | -3.009815000 | 4.526808000  |
| H  | -2.302661000 | -3.895835000 | 2.584442000  |
| H  | -3.530495000 | -2.589914000 | 2.497158000  |
| H  | -0.735764000 | -3.673889000 | 4.904131000  |
| H  | -1.284677000 | -2.416374000 | 6.039544000  |
| H  | -3.168917000 | -3.979899000 | 4.852391000  |

|                                                    |              |              |              |         |
|----------------------------------------------------|--------------|--------------|--------------|---------|
| H                                                  | -3.446839000 | -2.220848000 | 4.890201000  |         |
| O                                                  | -1.576766000 | -1.957582000 | 2.787143000  |         |
| Sum of electronic and thermal Energies=            |              |              | -1498.315158 |         |
| Sum of electronic and thermal Enthalpies=          |              |              | -1498.314214 |         |
| Sum of electronic and thermal Free Energies=       |              |              | -1498.414656 |         |
| Lowest vibration frequencies (/cm <sup>-1</sup> ): | 15.3722      | 24.3933      |              | 29.0190 |

**Ar' = C<sub>6</sub>F<sub>5</sub>**

|    |              |              |              |
|----|--------------|--------------|--------------|
| Fe | -0.589856000 | -0.178389000 | -0.870901000 |
| C  | 0.617011000  | 0.757778000  | 0.570471000  |
| C  | 2.042041000  | 0.850386000  | 0.533436000  |
| C  | -0.009435000 | 1.664049000  | 1.479651000  |
| C  | 2.765163000  | 1.786584000  | 1.283933000  |
| H  | 2.606726000  | 0.187613000  | -0.129719000 |
| C  | 0.702440000  | 2.610385000  | 2.229350000  |
| H  | -1.100055000 | 1.651033000  | 1.585209000  |
| C  | 2.098751000  | 2.679481000  | 2.134319000  |
| H  | 3.855177000  | 1.822886000  | 1.202126000  |
| H  | 0.165618000  | 3.295573000  | 2.891372000  |
| H  | 2.659274000  | 3.412565000  | 2.718460000  |
| C  | -1.099272000 | -2.052856000 | -0.227041000 |
| C  | -2.327505000 | -2.417717000 | 0.406291000  |
| C  | -0.307445000 | -3.162172000 | -0.660601000 |
| C  | -2.751010000 | -3.745968000 | 0.539900000  |
| H  | -2.993584000 | -1.631863000 | 0.776800000  |
| C  | -0.727345000 | -4.494047000 | -0.541803000 |
| H  | 0.659478000  | -2.975869000 | -1.142947000 |
| C  | -1.956841000 | -4.796347000 | 0.058605000  |
| H  | -3.711254000 | -3.963364000 | 1.016122000  |
| H  | -0.091289000 | -5.299389000 | -0.919729000 |
| H  | -2.287878000 | -5.832461000 | 0.155709000  |
| C  | -0.090994000 | 1.389698000  | -2.021420000 |
| C  | -0.710095000 | 2.638871000  | -2.055790000 |
| C  | 0.997139000  | 1.271929000  | -2.885531000 |
| C  | -0.306102000 | 3.692704000  | -2.880895000 |
| F  | -1.775686000 | 2.892827000  | -1.242716000 |
| C  | 1.453075000  | 2.284321000  | -3.732619000 |
| F  | 1.693171000  | 0.092033000  | -2.925142000 |
| C  | 0.789055000  | 3.514568000  | -3.731252000 |
| F  | -0.945686000 | 4.883630000  | -2.871749000 |
| F  | 2.516424000  | 2.105455000  | -4.547996000 |
| F  | 1.200155000  | 4.514751000  | -4.535362000 |
| C  | -1.902413000 | -0.560104000 | -2.310401000 |
| C  | -1.621982000 | -1.247388000 | -3.513320000 |
| C  | -3.241200000 | -0.133855000 | -2.143171000 |
| C  | -2.604978000 | -1.493884000 | -4.483210000 |
| H  | -0.607186000 | -1.604060000 | -3.712997000 |
| C  | -4.234211000 | -0.374853000 | -3.104202000 |

|                                                    |              |              |              |
|----------------------------------------------------|--------------|--------------|--------------|
| H                                                  | -3.534053000 | 0.413238000  | -1.240761000 |
| C                                                  | -3.922784000 | -1.058732000 | -4.287041000 |
| H                                                  | -2.338530000 | -2.027327000 | -5.401160000 |
| H                                                  | -5.254995000 | -0.019670000 | -2.930813000 |
| H                                                  | -4.690114000 | -1.244241000 | -5.042661000 |
| Mg                                                 | 0.161793000  | -1.250302000 | 1.426297000  |
| C                                                  | 2.369317000  | -2.741436000 | 3.131013000  |
| C                                                  | 0.316245000  | -2.522267000 | 4.326434000  |
| C                                                  | 2.381451000  | -3.684767000 | 4.321919000  |
| H                                                  | 3.075614000  | -1.907218000 | 3.253996000  |
| H                                                  | 2.555372000  | -3.241033000 | 2.171458000  |
| C                                                  | 1.391135000  | -3.018193000 | 5.276707000  |
| H                                                  | -0.421742000 | -3.304804000 | 4.093194000  |
| H                                                  | -0.203872000 | -1.618908000 | 4.671523000  |
| H                                                  | 2.027304000  | -4.683706000 | 4.029414000  |
| H                                                  | 3.387017000  | -3.786684000 | 4.749048000  |
| H                                                  | 0.984606000  | -3.710428000 | 6.024810000  |
| H                                                  | 1.862518000  | -2.176270000 | 5.803613000  |
| O                                                  | 1.023253000  | -2.184600000 | 3.098954000  |
| Sum of electronic and thermal Energies=            |              |              | -1978.245032 |
| Sum of electronic and thermal Enthalpies=          |              |              | -1978.244088 |
| Sum of electronic and thermal Free Energies=       |              |              | -1978.353090 |
| Lowest vibration frequencies (/cm <sup>-1</sup> ): | 21.9669      | 26.6189      | 31.8547      |

**Transition states for the reductive elimination of Ar-(2-Py) in [Ar<sub>2</sub>(2-Py)Fe<sup>II</sup>]<sup>-</sup> (S = 1)**

**Ar = *p*-Me<sub>2</sub>N-C<sub>6</sub>H<sub>4</sub>**

|    |              |              |              |
|----|--------------|--------------|--------------|
| Fe | 0.466198000  | 0.157087000  | 0.088322000  |
| C  | -1.162261000 | -0.755143000 | -0.053345000 |
| C  | -1.731027000 | -1.317677000 | -1.252168000 |
| N  | -1.402624000 | -1.371687000 | 1.164834000  |
| C  | -2.376021000 | -2.543231000 | -1.204221000 |
| H  | -1.616384000 | -0.799238000 | -2.205571000 |
| C  | -2.017384000 | -2.560321000 | 1.169002000  |
| C  | -2.517084000 | -3.213159000 | 0.034458000  |
| H  | -2.766406000 | -2.992214000 | -2.122795000 |
| H  | -2.133163000 | -3.026853000 | 2.156960000  |
| H  | -3.020893000 | -4.177759000 | 0.116345000  |
| C  | -1.251780000 | 1.065654000  | 0.059742000  |
| C  | -1.919350000 | 1.546307000  | 1.224619000  |
| C  | -1.514458000 | 1.826427000  | -1.121169000 |
| C  | -2.671097000 | 2.720601000  | 1.239059000  |
| H  | -1.844688000 | 0.968373000  | 2.147960000  |
| C  | -2.260210000 | 3.005608000  | -1.115384000 |
| H  | -1.099464000 | 1.501940000  | -2.079806000 |
| C  | -2.845562000 | 3.513713000  | 0.074060000  |
| H  | -3.134542000 | 3.013440000  | 2.181173000  |
| H  | -2.384118000 | 3.531131000  | -2.062208000 |



|                                                     |              |              |                                                 |
|-----------------------------------------------------|--------------|--------------|-------------------------------------------------|
| C                                                   | 2.447147000  | 0.002738000  | 0.063549000                                     |
| C                                                   | 3.320396000  | 1.126841000  | 0.051214000                                     |
| C                                                   | 3.155035000  | -1.228637000 | -0.013712000                                    |
| C                                                   | 4.718514000  | 1.050129000  | -0.030069000                                    |
| C                                                   | 4.550625000  | -1.342395000 | -0.101830000                                    |
| C                                                   | 5.383495000  | -0.197146000 | -0.129611000                                    |
| H                                                   | 2.594425000  | -2.171702000 | 0.003248000                                     |
| H                                                   | 5.286769000  | 1.981204000  | -0.021016000                                    |
| H                                                   | 4.982552000  | -2.342974000 | -0.147545000                                    |
| H                                                   | 2.898540000  | 2.138190000  | 0.117574000                                     |
| N                                                   | 6.778602000  | -0.289595000 | -0.286490000                                    |
| N                                                   | -3.539780000 | 4.732903000  | 0.100070000                                     |
| C                                                   | 7.407326000  | -1.572573000 | -0.052238000                                    |
| H                                                   | 7.272307000  | -1.946964000 | 0.983038000                                     |
| H                                                   | 7.017641000  | -2.333302000 | -0.742905000                                    |
| H                                                   | 8.483355000  | -1.484714000 | -0.245510000                                    |
| C                                                   | 7.583090000  | 0.863572000  | 0.059776000                                     |
| H                                                   | 7.496218000  | 1.156369000  | 1.126080000                                     |
| H                                                   | 8.636715000  | 0.641106000  | -0.148481000                                    |
| H                                                   | 7.311430000  | 1.732823000  | -0.554904000                                    |
| C                                                   | -4.391493000 | 5.015293000  | 1.236645000                                     |
| H                                                   | -5.221771000 | 4.289725000  | 1.352941000                                     |
| H                                                   | -3.811975000 | 5.023890000  | 2.170175000                                     |
| H                                                   | -4.825342000 | 6.015470000  | 1.119281000                                     |
| C                                                   | -3.968322000 | 5.307633000  | -1.157940000                                    |
| H                                                   | -3.108267000 | 5.511186000  | -1.810911000                                    |
| H                                                   | -4.679106000 | 4.663932000  | -1.714746000                                    |
| H                                                   | -4.458121000 | 6.269228000  | -0.963746000                                    |
| Sum of electronic and thermal Energies=             |              |              | -1102.304744                                    |
| Sum of electronic and thermal Enthalpies=           |              |              | -1102.303800                                    |
| Sum of electronic and thermal Free Energies=        |              |              | -1102.391162                                    |
| Lowest vibration frequencies (/cm <sup>-1</sup> ) : |              |              | -248.1878            12.3179            18.5260 |

**Ar = *p*-Me**

|    |              |              |              |
|----|--------------|--------------|--------------|
| Fe | 0.398248000  | 0.064067000  | 0.040110000  |
| C  | -1.236768000 | -0.862396000 | -0.079283000 |
| C  | -1.804545000 | -1.435900000 | -1.270336000 |
| N  | -1.461948000 | -1.467340000 | 1.143596000  |
| C  | -2.450352000 | -2.660909000 | -1.206269000 |
| H  | -1.696604000 | -0.925919000 | -2.228847000 |
| C  | -2.077781000 | -2.654760000 | 1.164843000  |
| C  | -2.585829000 | -3.316277000 | 0.038996000  |
| H  | -2.847876000 | -3.117900000 | -2.117451000 |
| H  | -2.187475000 | -3.110916000 | 2.157757000  |
| H  | -3.092156000 | -4.278242000 | 0.133395000  |
| C  | -1.314448000 | 0.957861000  | 0.018870000  |
| C  | -1.952225000 | 1.452810000  | 1.199043000  |
| C  | -1.573213000 | 1.705490000  | -1.175732000 |

|                                                     |              |              |                                                 |
|-----------------------------------------------------|--------------|--------------|-------------------------------------------------|
| C                                                   | -2.689274000 | 2.636275000  | 1.198223000                                     |
| H                                                   | -1.848264000 | 0.888184000  | 2.127606000                                     |
| C                                                   | -2.309619000 | 2.890992000  | -1.160034000                                    |
| H                                                   | -1.153650000 | 1.370232000  | -2.128562000                                    |
| C                                                   | -2.886390000 | 3.396138000  | 0.024199000                                     |
| H                                                   | -3.131457000 | 2.983376000  | 2.138321000                                     |
| H                                                   | -2.442227000 | 3.443244000  | -2.096474000                                    |
| C                                                   | 2.376508000  | -0.017235000 | 0.043430000                                     |
| C                                                   | 3.205140000  | 1.136640000  | 0.153558000                                     |
| C                                                   | 3.112873000  | -1.228223000 | -0.114615000                                    |
| C                                                   | 4.607331000  | 1.091968000  | 0.114817000                                     |
| C                                                   | 4.512747000  | -1.285776000 | -0.158976000                                    |
| C                                                   | 5.299422000  | -0.122745000 | -0.045065000                                    |
| H                                                   | 2.570820000  | -2.177884000 | -0.204165000                                    |
| H                                                   | 5.178525000  | 2.022631000  | 0.210287000                                     |
| H                                                   | 5.007816000  | -2.256163000 | -0.281831000                                    |
| H                                                   | 2.741590000  | 2.123194000  | 0.280787000                                     |
| C                                                   | -3.720893000 | 4.649937000  | 0.026649000                                     |
| H                                                   | -3.456249000 | 5.314052000  | -0.809304000                                    |
| H                                                   | -4.798687000 | 4.429252000  | -0.068161000                                    |
| H                                                   | -3.595820000 | 5.220091000  | 0.959721000                                     |
| C                                                   | 6.805172000  | -0.180612000 | -0.109516000                                    |
| H                                                   | 7.258302000  | 0.779458000  | 0.176645000                                     |
| H                                                   | 7.214348000  | -0.954166000 | 0.559199000                                     |
| H                                                   | 7.162924000  | -0.420114000 | -1.125086000                                    |
| Sum of electronic and thermal Energies=             |              |              | -913.193280                                     |
| Sum of electronic and thermal Enthalpies=           |              |              | -913.192336                                     |
| Sum of electronic and thermal Free Energies=        |              |              | -913.269418                                     |
| Lowest vibration frequencies (/cm <sup>-1</sup> ) : |              |              | -256.8203            14.2851            21.9708 |

**Ar = Ph**

|    |              |              |              |
|----|--------------|--------------|--------------|
| Fe | 0.393660000  | 0.050798000  | 0.033453000  |
| C  | -1.245720000 | -0.875420000 | -0.077446000 |
| C  | -1.817118000 | -1.460641000 | -1.260095000 |
| N  | -1.463957000 | -1.467311000 | 1.151983000  |
| C  | -2.464884000 | -2.683891000 | -1.179646000 |
| H  | -1.712355000 | -0.961738000 | -2.224683000 |
| C  | -2.080953000 | -2.653580000 | 1.189421000  |
| C  | -2.595946000 | -3.325247000 | 0.072842000  |
| H  | -2.867591000 | -3.149801000 | -2.083889000 |
| H  | -2.185885000 | -3.099012000 | 2.187519000  |
| H  | -3.103889000 | -4.284996000 | 0.179687000  |
| C  | -1.315113000 | 0.945365000  | 0.004544000  |
| C  | -1.952988000 | 1.446877000  | 1.184015000  |
| C  | -1.566535000 | 1.679600000  | -1.202689000 |
| C  | -2.685485000 | 2.633722000  | 1.174279000  |
| H  | -1.854616000 | 0.881596000  | 2.112562000  |
| C  | -2.296762000 | 2.868928000  | -1.200965000 |

|                                                    |              |              |              |
|----------------------------------------------------|--------------|--------------|--------------|
| H                                                  | -1.149697000 | 1.325718000  | -2.149715000 |
| C                                                  | -2.861213000 | 3.368938000  | -0.013176000 |
| H                                                  | -3.133758000 | 2.993329000  | 2.105762000  |
| H                                                  | -2.431421000 | 3.416015000  | -2.139217000 |
| H                                                  | -3.442366000 | 4.293473000  | -0.017590000 |
| C                                                  | 2.369985000  | -0.017945000 | 0.045390000  |
| C                                                  | 3.186413000  | 1.147039000  | 0.157084000  |
| C                                                  | 3.107241000  | -1.229533000 | -0.108416000 |
| C                                                  | 4.588259000  | 1.114017000  | 0.123593000  |
| C                                                  | 4.508589000  | -1.281676000 | -0.147797000 |
| C                                                  | 5.265966000  | -0.105832000 | -0.030886000 |
| H                                                  | 2.564939000  | -2.178588000 | -0.200460000 |
| H                                                  | 5.158748000  | 2.044438000  | 0.216491000  |
| H                                                  | 5.015881000  | -2.244910000 | -0.268616000 |
| H                                                  | 6.358278000  | -0.138914000 | -0.059442000 |
| H                                                  | 2.709295000  | 2.127716000  | 0.277580000  |
| Sum of electronic and thermal Energies=            |              |              | -834.651697  |
| Sum of electronic and thermal Enthalpies=          |              |              | -834.650752  |
| Sum of electronic and thermal Free Energies=       |              |              | -834.717895  |
| Lowest vibration frequencies (cm <sup>-1</sup> ) : | -260.8678    | 17.0968      | 25.2079      |

**Ar = p-CF<sub>3</sub>-C<sub>6</sub>H<sub>4</sub>**

|    |              |              |              |
|----|--------------|--------------|--------------|
| Fe | 0.414949000  | 0.013373000  | 0.009904000  |
| C  | -1.252892000 | -0.890973000 | -0.099675000 |
| C  | -1.821234000 | -1.448363000 | -1.291186000 |
| N  | -1.490191000 | -1.476771000 | 1.119853000  |
| C  | -2.517267000 | -2.646993000 | -1.219772000 |
| H  | -1.684668000 | -0.952790000 | -2.253207000 |
| C  | -2.155921000 | -2.636928000 | 1.152689000  |
| C  | -2.688325000 | -3.280651000 | 0.028401000  |
| H  | -2.928379000 | -3.095357000 | -2.128518000 |
| H  | -2.285306000 | -3.079639000 | 2.148120000  |
| H  | -3.236804000 | -4.218429000 | 0.127390000  |
| C  | -1.250260000 | 0.954375000  | -0.002497000 |
| C  | -1.864103000 | 1.453360000  | 1.192078000  |
| C  | -1.529632000 | 1.696375000  | -1.199890000 |
| C  | -2.593806000 | 2.634368000  | 1.208448000  |
| H  | -1.749285000 | 0.887618000  | 2.117829000  |
| C  | -2.256663000 | 2.879702000  | -1.182102000 |
| H  | -1.133605000 | 1.352957000  | -2.158677000 |
| C  | -2.788577000 | 3.384341000  | 0.025972000  |
| H  | -3.017707000 | 2.985062000  | 2.151420000  |
| H  | -2.408065000 | 3.425880000  | -2.115250000 |
| C  | 2.382156000  | -0.028221000 | 0.041632000  |
| C  | 3.189356000  | 1.143488000  | 0.151654000  |
| C  | 3.131656000  | -1.235800000 | -0.083600000 |
| C  | 4.586117000  | 1.124863000  | 0.141213000  |
| C  | 4.527958000  | -1.282615000 | -0.099266000 |

|                                                    |              |              |                                                 |
|----------------------------------------------------|--------------|--------------|-------------------------------------------------|
| C                                                  | 5.277606000  | -0.096687000 | 0.021659000                                     |
| H                                                  | 2.602928000  | -2.191666000 | -0.171497000                                    |
| H                                                  | 5.141879000  | 2.061267000  | 0.229523000                                     |
| H                                                  | 5.037568000  | -2.243423000 | -0.199151000                                    |
| H                                                  | 2.707390000  | 2.122434000  | 0.253108000                                     |
| C                                                  | -3.627427000 | 4.611552000  | 0.030178000                                     |
| F                                                  | -3.249964000 | 5.525928000  | -0.912205000                                    |
| F                                                  | -4.963136000 | 4.363302000  | -0.231965000                                    |
| F                                                  | -3.618513000 | 5.265772000  | 1.227451000                                     |
| C                                                  | 6.767594000  | -0.120603000 | -0.060888000                                    |
| F                                                  | 7.364352000  | 0.849743000  | 0.691352000                                     |
| F                                                  | 7.310351000  | -1.305177000 | 0.339845000                                     |
| F                                                  | 7.236096000  | 0.079185000  | -1.342555000                                    |
| Sum of electronic and thermal Energies=            |              |              | -1508.427268                                    |
| Sum of electronic and thermal Enthalpies=          |              |              | -1508.426324                                    |
| Sum of electronic and thermal Free Energies=       |              |              | -1508.513890                                    |
| Lowest vibration frequencies (/cm <sup>-1</sup> ): |              |              | -261.0878            11.2733            11.6503 |

**Ar = *p*-CN**

|    |              |              |              |
|----|--------------|--------------|--------------|
| Fe | 0.414514000  | -0.038869000 | -0.029920000 |
| C  | -1.261240000 | -0.952942000 | -0.106979000 |
| C  | -1.856059000 | -1.506662000 | -1.282329000 |
| N  | -1.482299000 | -1.517042000 | 1.118683000  |
| C  | -2.588666000 | -2.682812000 | -1.182546000 |
| H  | -1.718169000 | -1.028436000 | -2.252805000 |
| C  | -2.184985000 | -2.654645000 | 1.182556000  |
| C  | -2.759804000 | -3.291127000 | 0.075817000  |
| H  | -3.028764000 | -3.130428000 | -2.077669000 |
| H  | -2.306976000 | -3.080755000 | 2.185472000  |
| H  | -3.337022000 | -4.208828000 | 0.196230000  |
| C  | -1.222254000 | 0.932111000  | -0.028514000 |
| C  | -1.813537000 | 1.436567000  | 1.175668000  |
| C  | -1.526253000 | 1.656532000  | -1.230750000 |
| C  | -2.551042000 | 2.608306000  | 1.198058000  |
| H  | -1.674420000 | 0.879854000  | 2.103662000  |
| C  | -2.260794000 | 2.831060000  | -1.216544000 |
| H  | -1.144042000 | 1.303211000  | -2.191390000 |
| C  | -2.785450000 | 3.343010000  | 0.002131000  |
| H  | -2.961780000 | 2.975389000  | 2.140951000  |
| H  | -2.438029000 | 3.374243000  | -2.147050000 |
| C  | 2.377143000  | -0.034149000 | 0.002859000  |
| C  | 3.147926000  | 1.164275000  | 0.105963000  |
| C  | 3.157471000  | -1.226676000 | -0.100255000 |
| C  | 4.540712000  | 1.188100000  | 0.108207000  |
| C  | 4.550370000  | -1.239435000 | -0.103281000 |
| C  | 5.270157000  | -0.022667000 | 0.001919000  |
| H  | 2.652481000  | -2.195580000 | -0.181655000 |
| H  | 5.080615000  | 2.134388000  | 0.190342000  |

|                                                    |              |              |              |
|----------------------------------------------------|--------------|--------------|--------------|
| H                                                  | 5.097901000  | -2.181430000 | -0.184540000 |
| H                                                  | 2.634712000  | 2.128497000  | 0.189733000  |
| C                                                  | -3.539603000 | 4.539503000  | 0.019870000  |
| N                                                  | -4.168813000 | 5.541141000  | 0.034228000  |
| C                                                  | 6.689627000  | -0.016972000 | -0.000418000 |
| N                                                  | 7.870705000  | -0.012450000 | -0.003315000 |
| Sum of electronic and thermal Energies=            |              | -1019.092480 |              |
| Sum of electronic and thermal Enthalpies=          |              | -1019.091536 |              |
| Sum of electronic and thermal Free Energies=       |              | -1019.167522 |              |
| Lowest vibration frequencies (/cm <sup>-1</sup> ): | -247.9158    | 15.8359      | 21.5699      |

**Transition states for the reductive elimination of Ar-Ar in [Ar<sub>2</sub>(2-Py)Fe<sup>III</sup>]<sup>-</sup> (S = 1)**

**Ar = *p*-Me<sub>2</sub>N-C<sub>6</sub>H<sub>4</sub>**

|    |              |              |              |
|----|--------------|--------------|--------------|
| Fe | 0.442836000  | 0.022716000  | -0.006203000 |
| C  | -1.271318000 | -0.834404000 | -0.033479000 |
| C  | -1.884190000 | -1.373862000 | -1.206387000 |
| C  | -1.545813000 | -1.577768000 | 1.159344000  |
| C  | -2.613875000 | -2.562373000 | -1.205230000 |
| H  | -1.765402000 | -0.862099000 | -2.164215000 |
| C  | -2.266899000 | -2.772675000 | 1.163613000  |
| H  | -1.147313000 | -1.232677000 | 2.117579000  |
| C  | -2.838840000 | -3.308524000 | -0.018663000 |
| H  | -3.015912000 | -2.905643000 | -2.158588000 |
| H  | -2.383321000 | -3.286860000 | 2.117816000  |
| C  | -1.214580000 | 0.992100000  | 0.085399000  |
| C  | -1.759046000 | 1.561096000  | 1.276387000  |
| C  | -1.484768000 | 1.750373000  | -1.097401000 |
| C  | -2.411962000 | 2.793385000  | 1.300949000  |
| H  | -1.666486000 | 1.026073000  | 2.224193000  |
| C  | -2.129844000 | 2.987821000  | -1.078305000 |
| H  | -1.163745000 | 1.371038000  | -2.071398000 |
| C  | -2.598278000 | 3.569902000  | 0.127348000  |
| H  | -2.779710000 | 3.149002000  | 2.263407000  |
| H  | -2.266718000 | 3.499992000  | -2.030702000 |
| C  | 2.389143000  | -0.091640000 | -0.059301000 |
| N  | 3.141045000  | 1.067815000  | 0.088333000  |
| C  | 3.111161000  | -1.318468000 | -0.249407000 |
| C  | 4.480940000  | 1.002161000  | 0.050572000  |
| C  | 4.502678000  | -1.366310000 | -0.290393000 |
| C  | 5.227667000  | -0.168698000 | -0.135032000 |
| H  | 2.546956000  | -2.250377000 | -0.367299000 |
| H  | 5.006043000  | 1.959787000  | 0.177147000  |
| H  | 5.026728000  | -2.316677000 | -0.439413000 |
| H  | 6.319721000  | -0.143771000 | -0.156989000 |
| N  | -3.188460000 | 4.844994000  | 0.162449000  |
| N  | -3.637544000 | -4.467998000 | -0.005509000 |
| C  | -3.547701000 | -5.339008000 | 1.148346000  |

|                                                    |              |              |                                                 |
|----------------------------------------------------|--------------|--------------|-------------------------------------------------|
| H                                                  | -3.846273000 | -4.810728000 | 2.064301000                                     |
| H                                                  | -4.244873000 | -6.175759000 | 1.019597000                                     |
| H                                                  | -2.532209000 | -5.756453000 | 1.306901000                                     |
| C                                                  | -3.626014000 | 5.430694000  | -1.087067000                                    |
| H                                                  | -2.783871000 | 5.541988000  | -1.784020000                                    |
| H                                                  | -4.418991000 | 4.844346000  | -1.594937000                                    |
| H                                                  | -4.016858000 | 6.436821000  | -0.893015000                                    |
| C                                                  | -3.979416000 | 5.202001000  | 1.322008000                                     |
| H                                                  | -4.858579000 | 4.543072000  | 1.472979000                                     |
| H                                                  | -3.371986000 | 5.176315000  | 2.237119000                                     |
| H                                                  | -4.339581000 | 6.231353000  | 1.206384000                                     |
| C                                                  | -3.865978000 | -5.147798000 | -1.264257000                                    |
| H                                                  | -2.933718000 | -5.510719000 | -1.743523000                                    |
| H                                                  | -4.519648000 | -6.011203000 | -1.090735000                                    |
| H                                                  | -4.384199000 | -4.492984000 | -1.978111000                                    |
| Sum of electronic and thermal Energies=            |              |              | -1102.296080                                    |
| Sum of electronic and thermal Enthalpies=          |              |              | -1102.295136                                    |
| Sum of electronic and thermal Free Energies=       |              |              | -1102.383202                                    |
| Lowest vibration frequencies (/cm <sup>-1</sup> ): |              |              | -253.5750            15.6690            19.9718 |

**Ar = *p*-Me**

|    |              |              |              |
|----|--------------|--------------|--------------|
| Fe | 0.447768000  | 0.009935000  | -0.028372000 |
| C  | -1.268642000 | -0.835666000 | -0.030134000 |
| C  | -1.881356000 | -1.369516000 | -1.210491000 |
| C  | -1.545203000 | -1.563374000 | 1.175993000  |
| C  | -2.612521000 | -2.556552000 | -1.193223000 |
| H  | -1.758740000 | -0.853980000 | -2.165325000 |
| C  | -2.272918000 | -2.753725000 | 1.173658000  |
| H  | -1.147613000 | -1.205566000 | 2.129409000  |
| C  | -2.829112000 | -3.290371000 | -0.006595000 |
| H  | -3.031608000 | -2.928295000 | -2.134449000 |
| H  | -2.417032000 | -3.284176000 | 2.121102000  |
| C  | -1.201028000 | 0.986958000  | 0.079085000  |
| C  | -1.690759000 | 1.564894000  | 1.293556000  |
| C  | -1.491920000 | 1.735554000  | -1.109075000 |
| C  | -2.331470000 | 2.803597000  | 1.318261000  |
| H  | -1.547386000 | 1.039801000  | 2.240346000  |
| C  | -2.126835000 | 2.976963000  | -1.066500000 |
| H  | -1.181519000 | 1.349744000  | -2.083788000 |
| C  | -2.567131000 | 3.551059000  | 0.144504000  |
| H  | -2.659913000 | 3.206342000  | 2.282323000  |
| H  | -2.287176000 | 3.519325000  | -2.004446000 |
| C  | 2.398508000  | -0.106440000 | -0.092125000 |
| N  | 3.135374000  | 1.057619000  | 0.053095000  |
| C  | 3.124822000  | -1.328096000 | -0.279516000 |
| C  | 4.476365000  | 1.005012000  | 0.015658000  |
| C  | 4.517419000  | -1.363818000 | -0.319327000 |
| C  | 5.230679000  | -0.160840000 | -0.166773000 |

|                                                    |              |              |              |
|----------------------------------------------------|--------------|--------------|--------------|
| H                                                  | 2.567345000  | -2.263884000 | -0.395807000 |
| H                                                  | 4.992627000  | 1.967128000  | 0.139880000  |
| H                                                  | 5.049710000  | -2.309657000 | -0.465774000 |
| H                                                  | 6.322402000  | -0.127523000 | -0.188506000 |
| C                                                  | -3.660372000 | -4.546105000 | 0.006398000  |
| H                                                  | -3.537891000 | -5.124627000 | -0.921901000 |
| H                                                  | -3.389452000 | -5.202219000 | 0.846897000  |
| H                                                  | -4.738876000 | -4.329416000 | 0.105153000  |
| C                                                  | -3.301232000 | 4.865491000  | 0.176293000  |
| H                                                  | -2.990506000 | 5.523096000  | -0.649290000 |
| H                                                  | -4.393719000 | 4.732680000  | 0.084109000  |
| H                                                  | -3.125724000 | 5.406290000  | 1.118373000  |
| Sum of electronic and thermal Energies=            |              |              | -913.185996  |
| Sum of electronic and thermal Enthalpies=          |              |              | -913.185052  |
| Sum of electronic and thermal Free Energies=       |              |              | -913.261843  |
| Lowest vibration frequencies (/cm <sup>-1</sup> ): | -261.8072    | 20.8509      | 27.7444      |

**Ar = Ph**

|    |              |              |              |
|----|--------------|--------------|--------------|
| Fe | 0.444323000  | 0.005895000  | -0.030353000 |
| C  | -1.271624000 | -0.837829000 | -0.033076000 |
| C  | -1.895742000 | -1.362705000 | -1.213612000 |
| C  | -1.535405000 | -1.564560000 | 1.179382000  |
| C  | -2.626113000 | -2.550582000 | -1.195431000 |
| H  | -1.784838000 | -0.836626000 | -2.163701000 |
| C  | -2.261401000 | -2.755663000 | 1.183574000  |
| H  | -1.131657000 | -1.200995000 | 2.127828000  |
| C  | -2.815737000 | -3.272220000 | -0.002014000 |
| H  | -3.059860000 | -2.922225000 | -2.129008000 |
| H  | -2.402442000 | -3.290792000 | 2.127851000  |
| C  | -1.202553000 | 0.983385000  | 0.079041000  |
| C  | -1.700116000 | 1.554036000  | 1.295878000  |
| C  | -1.480693000 | 1.731268000  | -1.115224000 |
| C  | -2.333968000 | 2.796376000  | 1.321714000  |
| H  | -1.570192000 | 1.017882000  | 2.237973000  |
| C  | -2.108564000 | 2.976536000  | -1.077067000 |
| H  | -1.168575000 | 1.338006000  | -2.086208000 |
| C  | -2.542398000 | 3.531632000  | 0.140268000  |
| H  | -2.673771000 | 3.201121000  | 2.279996000  |
| H  | -2.264906000 | 3.524823000  | -2.011218000 |
| C  | 2.396135000  | -0.109894000 | -0.093166000 |
| N  | 3.126835000  | 1.055647000  | 0.057598000  |
| C  | 3.125089000  | -1.328440000 | -0.284125000 |
| C  | 4.468223000  | 1.008656000  | 0.021937000  |
| C  | 4.518083000  | -1.358708000 | -0.322173000 |
| C  | 5.226287000  | -0.154029000 | -0.164030000 |
| H  | 2.570785000  | -2.265448000 | -0.404644000 |
| H  | 4.980580000  | 1.972086000  | 0.150623000  |
| H  | 5.054115000  | -2.301896000 | -0.471386000 |

|                                                    |              |              |              |  |  |
|----------------------------------------------------|--------------|--------------|--------------|--|--|
| H                                                  | 6.317878000  | -0.116886000 | -0.184154000 |  |  |
| H                                                  | -3.045940000 | 4.500183000  | 0.165545000  |  |  |
| H                                                  | -3.397729000 | -4.195988000 | 0.007697000  |  |  |
| Sum of electronic and thermal Energies=            |              |              | -834.644636  |  |  |
| Sum of electronic and thermal Enthalpies=          |              |              | -834.643692  |  |  |
| Sum of electronic and thermal Free Energies=       |              |              | -834.710474  |  |  |
| Lowest vibration frequencies (/cm <sup>-1</sup> ): | -276.7247    | 24.8885      | 29.8627      |  |  |

**Ar = *p*-CF<sub>3</sub>-C<sub>6</sub>H<sub>4</sub>**

|    |              |              |              |
|----|--------------|--------------|--------------|
| Fe | 0.497107000  | -0.047607000 | -0.016809000 |
| C  | -1.211753000 | -0.892953000 | -0.019498000 |
| C  | -1.735689000 | -1.441275000 | -1.238922000 |
| C  | -1.642573000 | -1.554390000 | 1.181166000  |
| C  | -2.526446000 | -2.582688000 | -1.260610000 |
| H  | -1.489832000 | -0.976518000 | -2.195304000 |
| C  | -2.430397000 | -2.696573000 | 1.157900000  |
| H  | -1.318998000 | -1.180166000 | 2.154211000  |
| C  | -2.879119000 | -3.246252000 | -0.064730000 |
| H  | -2.869813000 | -2.970414000 | -2.221344000 |
| H  | -2.696881000 | -3.175920000 | 2.102120000  |
| C  | -1.120268000 | 0.964931000  | 0.058245000  |
| C  | -1.521948000 | 1.564416000  | 1.297498000  |
| C  | -1.525877000 | 1.669918000  | -1.124080000 |
| C  | -2.181422000 | 2.786304000  | 1.351155000  |
| H  | -1.285299000 | 1.073635000  | 2.243078000  |
| C  | -2.182032000 | 2.892093000  | -1.070099000 |
| H  | -1.289492000 | 1.262724000  | -2.108861000 |
| C  | -2.513654000 | 3.483615000  | 0.169708000  |
| H  | -2.434695000 | 3.209621000  | 2.324581000  |
| H  | -2.435192000 | 3.400332000  | -2.002754000 |
| C  | 2.460787000  | -0.150939000 | -0.067025000 |
| N  | 3.122665000  | 1.054898000  | -0.013560000 |
| C  | 3.238838000  | -1.344147000 | -0.160907000 |
| C  | 4.465305000  | 1.077270000  | -0.051371000 |
| C  | 4.632927000  | -1.305533000 | -0.199658000 |
| C  | 5.276995000  | -0.059314000 | -0.143567000 |
| H  | 2.729987000  | -2.312550000 | -0.204649000 |
| H  | 4.926685000  | 2.072405000  | -0.005013000 |
| H  | 5.216781000  | -2.228517000 | -0.272546000 |
| H  | 6.365271000  | 0.029316000  | -0.170769000 |
| C  | -3.273184000 | 4.761647000  | 0.212367000  |
| F  | -2.870699000 | 5.656700000  | -0.741154000 |
| F  | -4.627999000 | 4.599554000  | -0.007854000 |
| F  | -3.178514000 | 5.405715000  | 1.408837000  |
| C  | -3.778553000 | -4.428878000 | -0.073928000 |
| F  | -5.104249000 | -4.111911000 | 0.160931000  |
| F  | -3.777374000 | -5.098806000 | -1.261091000 |
| F  | -3.466314000 | -5.349644000 | 0.888900000  |



|                                                    |              |          |         |
|----------------------------------------------------|--------------|----------|---------|
| Sum of electronic and thermal Energies=            | -1508.421994 |          |         |
| Sum of electronic and thermal Enthalpies=          | -1508.421050 |          |         |
| Sum of electronic and thermal Free Energies=       | -1508.504728 |          |         |
| Lowest vibration frequencies (/cm <sup>-1</sup> ): | -273.2768    | -12.0608 | 19.8791 |

**Ar = *p*-CN**

|                                                    |              |              |              |
|----------------------------------------------------|--------------|--------------|--------------|
| Fe                                                 | 0.483200000  | -0.049706000 | -0.034170000 |
| C                                                  | -1.204031000 | -0.922713000 | -0.020686000 |
| C                                                  | -1.744785000 | -1.454339000 | -1.239977000 |
| C                                                  | -1.648311000 | -1.563230000 | 1.185320000  |
| C                                                  | -2.580156000 | -2.558819000 | -1.260127000 |
| H                                                  | -1.477461000 | -1.002261000 | -2.196826000 |
| C                                                  | -2.482271000 | -2.668781000 | 1.173727000  |
| H                                                  | -1.302263000 | -1.198245000 | 2.154124000  |
| C                                                  | -2.968530000 | -3.199943000 | -0.052114000 |
| H                                                  | -2.943808000 | -2.946533000 | -2.213875000 |
| H                                                  | -2.768475000 | -3.142596000 | 2.114882000  |
| C                                                  | -1.109090000 | 0.992218000  | 0.057083000  |
| C                                                  | -1.493462000 | 1.578822000  | 1.307417000  |
| C                                                  | -1.554549000 | 1.681832000  | -1.118236000 |
| C                                                  | -2.185214000 | 2.777422000  | 1.380397000  |
| H                                                  | -1.217251000 | 1.093706000  | 2.245337000  |
| C                                                  | -2.246609000 | 2.880718000  | -1.055578000 |
| H                                                  | -1.325093000 | 1.278677000  | -2.106309000 |
| C                                                  | -2.577154000 | 3.461444000  | 0.198323000  |
| H                                                  | -2.430480000 | 3.205297000  | 2.354441000  |
| H                                                  | -2.539444000 | 3.388531000  | -1.976606000 |
| C                                                  | 2.451608000  | -0.173581000 | -0.098015000 |
| N                                                  | 3.099448000  | 1.035776000  | -0.053651000 |
| C                                                  | 3.231970000  | -1.362141000 | -0.191578000 |
| C                                                  | 4.441942000  | 1.070851000  | -0.100206000 |
| C                                                  | 4.626022000  | -1.311899000 | -0.239509000 |
| C                                                  | 5.259535000  | -0.061015000 | -0.193134000 |
| H                                                  | 2.729197000  | -2.333647000 | -0.227953000 |
| H                                                  | 4.895089000  | 2.069538000  | -0.061024000 |
| H                                                  | 5.216881000  | -2.230106000 | -0.312454000 |
| H                                                  | 6.346833000  | 0.035167000  | -0.228164000 |
| C                                                  | -3.822280000 | -4.327541000 | -0.068204000 |
| N                                                  | -4.533069000 | -5.272842000 | -0.081064000 |
| C                                                  | -3.287049000 | 4.684061000  | 0.268080000  |
| N                                                  | -3.878035000 | 5.706391000  | 0.325881000  |
| Sum of electronic and thermal Energies=            | -1019.087113 |              |              |
| Sum of electronic and thermal Enthalpies=          | -1019.086169 |              |              |
| Sum of electronic and thermal Free Energies=       | -1019.162566 |              |              |
| Lowest vibration frequencies (/cm <sup>-1</sup> ): | -269.9425    | 23.4734      | 25.6288      |

**Transition state for the reductive elimination of Ph-C<sub>6</sub>F<sub>5</sub> in [Ph<sub>2</sub>(C<sub>6</sub>F<sub>5</sub>)Fe<sup>II</sup>]<sup>-</sup> (S = 1)**

|                                                    |              |              |              |
|----------------------------------------------------|--------------|--------------|--------------|
| Fe                                                 | 0.465107000  | -0.028878000 | -0.000282000 |
| C                                                  | -1.240533000 | -0.986411000 | -0.020506000 |
| C                                                  | -1.704717000 | -1.628043000 | -1.218431000 |
| C                                                  | -1.671816000 | -1.695619000 | 1.151361000  |
| C                                                  | -2.616652000 | -2.667754000 | -1.251791000 |
| F                                                  | -1.112841000 | -1.291815000 | -2.409070000 |
| C                                                  | -2.581572000 | -2.737439000 | 1.151724000  |
| C                                                  | -3.101862000 | -3.221735000 | -0.057884000 |
| F                                                  | -3.008655000 | -3.209483000 | -2.436590000 |
| F                                                  | -2.937076000 | -3.349414000 | 2.313652000  |
| F                                                  | -4.191120000 | -4.037568000 | -0.065638000 |
| C                                                  | -1.327848000 | 0.754795000  | 0.028653000  |
| C                                                  | -1.713571000 | 1.376336000  | 1.262169000  |
| C                                                  | -1.690107000 | 1.452508000  | -1.171016000 |
| C                                                  | -2.317216000 | 2.633376000  | 1.285443000  |
| H                                                  | -1.515100000 | 0.876217000  | 2.209024000  |
| C                                                  | -2.292449000 | 2.709813000  | -1.127240000 |
| H                                                  | -1.474142000 | 1.012762000  | -2.143773000 |
| C                                                  | -2.606738000 | 3.324566000  | 0.096563000  |
| H                                                  | -2.569306000 | 3.081401000  | 2.250867000  |
| H                                                  | -2.524697000 | 3.218141000  | -2.067434000 |
| H                                                  | -3.082695000 | 4.306587000  | 0.122855000  |
| C                                                  | 2.445694000  | 0.044230000  | -0.012021000 |
| C                                                  | 3.149398000  | 1.280930000  | -0.072323000 |
| C                                                  | 3.280943000  | -1.106889000 | 0.036180000  |
| C                                                  | 4.549271000  | 1.367642000  | -0.084114000 |
| C                                                  | 4.682745000  | -1.039289000 | 0.024696000  |
| C                                                  | 5.330334000  | 0.203010000  | -0.035863000 |
| H                                                  | 2.822356000  | -2.101700000 | 0.083942000  |
| H                                                  | 5.035751000  | 2.347343000  | -0.132304000 |
| H                                                  | 5.274302000  | -1.959816000 | 0.062766000  |
| H                                                  | 6.421694000  | 0.263036000  | -0.045884000 |
| H                                                  | 2.586016000  | 2.221403000  | -0.112944000 |
| F                                                  | -1.046568000 | -1.424080000 | 2.342151000  |
| Sum of electronic and thermal Energies=            |              |              | -1314.568982 |
| Sum of electronic and thermal Enthalpies=          |              |              | -1314.568038 |
| Sum of electronic and thermal Free Energies=       |              |              | -1314.643774 |
| Lowest vibration frequencies (/cm <sup>-1</sup> ): | -288.9180    | -23.0470     | 19.0476      |

**Transition state for the reductive elimination of Ph-Ph in [Ph<sub>2</sub>(C<sub>6</sub>F<sub>5</sub>)Fe<sup>II</sup>]<sup>-</sup> (S = 1)**

|    |              |              |              |
|----|--------------|--------------|--------------|
| Fe | 0.362473000  | -0.000864000 | 0.010432000  |
| C  | -1.318890000 | -0.907432000 | -0.000689000 |
| C  | -1.616192000 | -1.562310000 | -1.243540000 |
| C  | -1.825613000 | -1.549782000 | 1.176662000  |
| C  | -2.270768000 | -2.793497000 | -1.288366000 |
| H  | -1.299659000 | -1.109636000 | -2.186197000 |
| C  | -2.484885000 | -2.777375000 | 1.118538000  |

|                                                    |              |              |              |
|----------------------------------------------------|--------------|--------------|--------------|
| H                                                  | -1.681061000 | -1.084513000 | 2.153434000  |
| C                                                  | -2.712817000 | -3.422520000 | -0.110807000 |
| H                                                  | -2.442436000 | -3.271543000 | -2.257541000 |
| H                                                  | -2.829491000 | -3.241415000 | 2.047564000  |
| H                                                  | -3.237806000 | -4.378951000 | -0.151466000 |
| C                                                  | -1.319091000 | 0.905065000  | 0.010368000  |
| C                                                  | -1.626988000 | 1.560092000  | 1.250530000  |
| C                                                  | -1.815896000 | 1.547069000  | -1.171429000 |
| C                                                  | -2.281853000 | 2.791375000  | 1.289405000  |
| H                                                  | -1.318569000 | 1.107550000  | 2.195927000  |
| C                                                  | -2.475269000 | 2.774841000  | -1.119300000 |
| H                                                  | -1.663129000 | 1.081484000  | -2.146801000 |
| C                                                  | -2.713500000 | 3.420299000  | 0.107937000  |
| H                                                  | -2.461960000 | 3.269654000  | 2.256934000  |
| H                                                  | -2.811745000 | 3.238748000  | -2.051370000 |
| H                                                  | -3.238579000 | 4.376872000  | 0.143859000  |
| C                                                  | 2.362125000  | -0.000978000 | 0.000055000  |
| C                                                  | 3.133349000  | 1.167568000  | -0.057137000 |
| C                                                  | 3.133828000  | -1.170083000 | 0.034952000  |
| C                                                  | 4.527956000  | 1.203085000  | -0.081957000 |
| C                                                  | 4.528452000  | -1.206800000 | 0.013291000  |
| C                                                  | 5.239656000  | -0.002184000 | -0.046362000 |
| F                                                  | 2.505797000  | -2.387428000 | 0.094776000  |
| F                                                  | 5.213568000  | 2.369388000  | -0.139817000 |
| F                                                  | 5.214613000  | -2.373727000 | 0.047536000  |
| F                                                  | 6.589370000  | -0.002840000 | -0.069459000 |
| F                                                  | 2.504806000  | 2.385607000  | -0.092541000 |
| Sum of electronic and thermal Energies=            |              |              | -1314.587819 |
| Sum of electronic and thermal Enthalpies=          |              |              | -1314.586875 |
| Sum of electronic and thermal Free Energies=       |              |              | -1314.659594 |
| Lowest vibration frequencies (/cm <sup>-1</sup> ): | -266.2792    | -54.8177     | -2.1625      |

**Transition state for the reductive elimination of Ph-Ar' in [Ph<sub>3</sub>Ar'Fe<sup>II</sup>Mg(THF)] (S = 1)**

**Ar' = 2-Py**

|    |              |              |              |
|----|--------------|--------------|--------------|
| Fe | -0.806748000 | -0.331536000 | -1.165533000 |
| C  | -0.200722000 | 0.859430000  | 0.401232000  |
| C  | 1.215747000  | 1.064102000  | 0.532302000  |
| C  | -0.979686000 | 1.790479000  | 1.162679000  |
| C  | 1.783571000  | 2.113555000  | 1.265500000  |
| H  | 1.904791000  | 0.385700000  | 0.014656000  |
| C  | -0.425068000 | 2.833783000  | 1.913211000  |
| H  | -2.071649000 | 1.711868000  | 1.134789000  |
| C  | 0.966018000  | 3.014342000  | 1.966215000  |
| H  | 2.871679000  | 2.228042000  | 1.295610000  |
| H  | -1.082585000 | 3.519559000  | 2.457126000  |
| H  | 1.402623000  | 3.831012000  | 2.545656000  |
| C  | -0.683578000 | -2.376838000 | -0.810624000 |

|                                              |              |              |              |
|----------------------------------------------|--------------|--------------|--------------|
| C                                            | -1.783312000 | -3.290402000 | -0.864217000 |
| C                                            | 0.589746000  | -2.979451000 | -1.066914000 |
| C                                            | -1.638480000 | -4.645730000 | -1.186357000 |
| H                                            | -2.795947000 | -2.920093000 | -0.674461000 |
| C                                            | 0.746534000  | -4.330054000 | -1.403358000 |
| H                                            | 1.494311000  | -2.361285000 | -1.030835000 |
| C                                            | -0.370411000 | -5.177645000 | -1.465259000 |
| H                                            | -2.520656000 | -5.291772000 | -1.230853000 |
| H                                            | 1.743784000  | -4.726734000 | -1.616140000 |
| H                                            | -0.254146000 | -6.233255000 | -1.721608000 |
| C                                            | -0.465249000 | 0.275717000  | -3.036659000 |
| C                                            | 0.641699000  | 1.147296000  | -3.219247000 |
| C                                            | -0.834442000 | -0.532472000 | -4.143014000 |
| C                                            | 1.374506000  | 1.157039000  | -4.409933000 |
| H                                            | 0.942884000  | 1.817182000  | -2.410909000 |
| C                                            | -0.095032000 | -0.528865000 | -5.329295000 |
| H                                            | -1.717328000 | -1.170392000 | -4.061810000 |
| C                                            | 1.019274000  | 0.312452000  | -5.473293000 |
| H                                            | 2.232608000  | 1.828113000  | -4.510132000 |
| H                                            | -0.394630000 | -1.182099000 | -6.153998000 |
| H                                            | 1.590656000  | 0.322192000  | -6.404077000 |
| C                                            | -1.946078000 | 0.888970000  | -2.031337000 |
| N                                            | -3.005090000 | 0.026916000  | -2.124842000 |
| C                                            | -2.156387000 | 2.299562000  | -2.167921000 |
| C                                            | -4.245433000 | 0.515677000  | -2.240426000 |
| C                                            | -3.447593000 | 2.777028000  | -2.327890000 |
| H                                            | -1.312593000 | 2.987968000  | -2.121982000 |
| C                                            | -4.538200000 | 1.879787000  | -2.358347000 |
| H                                            | -5.052486000 | -0.227428000 | -2.262526000 |
| H                                            | -3.620697000 | 3.853369000  | -2.421070000 |
| H                                            | -5.563932000 | 2.224271000  | -2.496664000 |
| Mg                                           | -0.638268000 | -1.255646000 | 1.193372000  |
| C                                            | -0.851646000 | -1.096418000 | 4.344315000  |
| C                                            | -1.022889000 | -3.338535000 | 3.545456000  |
| C                                            | -1.347969000 | -1.987471000 | 5.468721000  |
| H                                            | -1.492412000 | -0.228731000 | 4.144344000  |
| H                                            | 0.181727000  | -0.756197000 | 4.510487000  |
| C                                            | -0.820289000 | -3.359779000 | 5.050355000  |
| H                                            | -0.287185000 | -3.930436000 | 2.985898000  |
| H                                            | -2.037827000 | -3.652946000 | 3.259909000  |
| H                                            | -0.967923000 | -1.660513000 | 6.444880000  |
| H                                            | -2.446866000 | -1.987233000 | 5.507959000  |
| H                                            | 0.246357000  | -3.458912000 | 5.298160000  |
| H                                            | -1.361980000 | -4.189761000 | 5.521423000  |
| O                                            | -0.862429000 | -1.941619000 | 3.157601000  |
| Sum of electronic and thermal Energies=      |              |              | -1498.298206 |
| Sum of electronic and thermal Enthalpies=    |              |              | -1498.297262 |
| Sum of electronic and thermal Free Energies= |              |              | -1498.395454 |

Lowest vibration frequencies (/cm<sup>-1</sup>) : -271.2634

15.8238

21.1921

**Ar' = C<sub>6</sub>F<sub>5</sub>**

|    |              |              |              |
|----|--------------|--------------|--------------|
| Fe | -0.630065000 | -0.088123000 | -1.044347000 |
| C  | 0.469099000  | 0.913965000  | 0.366434000  |
| C  | 1.887624000  | 1.102721000  | 0.341865000  |
| C  | -0.222050000 | 1.804006000  | 1.250451000  |
| C  | 2.540172000  | 2.097876000  | 1.079908000  |
| H  | 2.503544000  | 0.464348000  | -0.299623000 |
| C  | 0.419256000  | 2.810640000  | 1.982296000  |
| H  | -1.309666000 | 1.718199000  | 1.356408000  |
| C  | 1.810917000  | 2.967213000  | 1.903750000  |
| H  | 3.627114000  | 2.199367000  | 1.008754000  |
| H  | -0.169239000 | 3.475301000  | 2.621469000  |
| H  | 2.316963000  | 3.746160000  | 2.478242000  |
| C  | -1.219083000 | -2.041963000 | -0.593821000 |
| C  | -2.487698000 | -2.383106000 | -0.030791000 |
| C  | -0.540638000 | -3.137496000 | -1.212132000 |
| C  | -3.045280000 | -3.665750000 | -0.115836000 |
| H  | -3.077881000 | -1.608379000 | 0.472620000  |
| C  | -1.088271000 | -4.422457000 | -1.310356000 |
| H  | 0.448693000  | -2.974470000 | -1.656298000 |
| C  | -2.349314000 | -4.697663000 | -0.760863000 |
| H  | -4.028550000 | -3.862725000 | 0.321539000  |
| H  | -0.529952000 | -5.215222000 | -1.816973000 |
| H  | -2.778656000 | -5.699753000 | -0.829153000 |
| C  | -0.480095000 | 1.232014000  | -2.529099000 |
| C  | -0.876808000 | 2.613306000  | -2.557685000 |
| C  | 0.767980000  | 1.050063000  | -3.221727000 |
| C  | -0.262870000 | 3.594931000  | -3.315103000 |
| F  | -1.878719000 | 3.025553000  | -1.723234000 |
| C  | 1.418580000  | 2.008159000  | -3.970936000 |
| F  | 1.435317000  | -0.138685000 | -3.008204000 |
| C  | 0.889254000  | 3.305344000  | -4.060766000 |
| F  | -0.737782000 | 4.869563000  | -3.312950000 |
| F  | 2.596360000  | 1.730519000  | -4.592414000 |
| F  | 1.341959000  | 4.174664000  | -5.002637000 |
| C  | -1.700673000 | 0.116004000  | -2.878287000 |
| C  | -1.535988000 | -0.709142000 | -4.022567000 |
| C  | -3.039195000 | 0.387940000  | -2.483696000 |
| C  | -2.626242000 | -1.249636000 | -4.701993000 |
| H  | -0.532617000 | -0.922216000 | -4.394215000 |
| C  | -4.131938000 | -0.155478000 | -3.163323000 |
| H  | -3.232824000 | 1.032197000  | -1.624902000 |
| C  | -3.937509000 | -0.978922000 | -4.279936000 |
| H  | -2.454264000 | -1.887077000 | -5.573380000 |
| H  | -5.144592000 | 0.065489000  | -2.815796000 |
| H  | -4.790840000 | -1.396067000 | -4.818403000 |

|                                                     |              |              |              |
|-----------------------------------------------------|--------------|--------------|--------------|
| Mg                                                  | 0.079206000  | -1.233800000 | 1.101267000  |
| C                                                   | 2.282398000  | -2.676814000 | 2.832062000  |
| C                                                   | 0.305093000  | -2.267083000 | 4.102571000  |
| C                                                   | 2.386994000  | -3.396862000 | 4.166237000  |
| H                                                   | 2.987104000  | -1.835172000 | 2.757648000  |
| H                                                   | 2.405765000  | -3.335556000 | 1.961991000  |
| C                                                   | 1.445382000  | -2.581877000 | 5.053457000  |
| H                                                   | -0.427928000 | -3.086747000 | 4.047795000  |
| H                                                   | -0.214941000 | -1.325419000 | 4.323033000  |
| H                                                   | 2.034294000  | -4.434144000 | 4.075752000  |
| H                                                   | 3.418994000  | -3.414438000 | 4.538618000  |
| H                                                   | 1.100296000  | -3.136697000 | 5.934992000  |
| H                                                   | 1.932540000  | -1.656984000 | 5.394005000  |
| O                                                   | 0.931024000  | -2.132705000 | 2.795965000  |
| Sum of electronic and thermal Energies=             |              |              | -1978.215812 |
| Sum of electronic and thermal Enthalpies=           |              |              | -1978.214868 |
| Sum of electronic and thermal Free Energies=        |              |              | -1978.322479 |
| Lowest vibration frequencies (/cm <sup>-1</sup> ) : | -253.7097    | 19.3277      | 23.9729      |

**Transition state for the reductive elimination of Ph-Ph in [Ph<sub>3</sub>Ar'<sup>1</sup>Fe<sup>II</sup>Mg(THF)] (S = 1)**

**Ar' = 2-Py**

|    |              |              |              |
|----|--------------|--------------|--------------|
| Fe | -0.537946000 | -0.168696000 | -1.160746000 |
| C  | 0.128359000  | 0.670772000  | 0.573849000  |
| C  | 1.538164000  | 0.541584000  | 0.811609000  |
| C  | -0.455277000 | 1.853641000  | 1.131588000  |
| C  | 2.294162000  | 1.516797000  | 1.475473000  |
| H  | 2.064139000  | -0.342069000 | 0.433406000  |
| C  | 0.292710000  | 2.833125000  | 1.791766000  |
| H  | -1.530572000 | 2.022665000  | 1.019173000  |
| C  | 1.678209000  | 2.675989000  | 1.968813000  |
| H  | 3.370774000  | 1.373121000  | 1.607647000  |
| H  | -0.205057000 | 3.728807000  | 2.175889000  |
| H  | 2.262570000  | 3.439723000  | 2.486998000  |
| C  | 0.116165000  | -2.106695000 | -1.193849000 |
| N  | 0.156777000  | -2.807422000 | 0.012290000  |
| C  | 0.602708000  | -2.831512000 | -2.321486000 |
| C  | 0.609915000  | -4.075574000 | 0.109104000  |
| C  | 1.076912000  | -4.137754000 | -2.231336000 |
| H  | 0.607651000  | -2.334054000 | -3.291483000 |
| C  | 1.081973000  | -4.790970000 | -0.983448000 |
| H  | 0.588726000  | -4.521225000 | 1.109078000  |
| H  | 1.450496000  | -4.654765000 | -3.120526000 |
| H  | 1.444528000  | -5.813094000 | -0.866046000 |
| C  | -0.523870000 | 0.172396000  | -3.092222000 |
| C  | 0.465488000  | 1.189120000  | -3.286212000 |
| C  | -0.919961000 | -0.528261000 | -4.268537000 |
| C  | 1.083058000  | 1.400432000  | -4.521172000 |

|                                                     |              |              |              |
|-----------------------------------------------------|--------------|--------------|--------------|
| H                                                   | 0.770380000  | 1.816700000  | -2.441425000 |
| C                                                   | -0.325646000 | -0.290704000 | -5.510016000 |
| H                                                   | -1.713890000 | -1.275867000 | -4.204595000 |
| C                                                   | 0.693713000  | 0.665050000  | -5.653479000 |
| H                                                   | 1.865192000  | 2.160870000  | -4.606444000 |
| H                                                   | -0.660201000 | -0.863407000 | -6.380621000 |
| H                                                   | 1.154875000  | 0.849544000  | -6.625983000 |
| C                                                   | -2.038934000 | 0.660166000  | -2.048629000 |
| C                                                   | -3.093840000 | -0.299646000 | -1.985222000 |
| C                                                   | -2.422456000 | 2.025645000  | -2.133240000 |
| C                                                   | -4.435999000 | 0.090588000  | -1.926552000 |
| C                                                   | -3.764827000 | 2.407843000  | -2.093424000 |
| H                                                   | -1.653149000 | 2.794459000  | -2.234295000 |
| C                                                   | -4.785942000 | 1.448283000  | -1.979544000 |
| H                                                   | -5.217402000 | -0.672609000 | -1.863041000 |
| H                                                   | -4.022517000 | 3.469417000  | -2.152312000 |
| H                                                   | -5.834366000 | 1.753198000  | -1.961296000 |
| Mg                                                  | -0.723679000 | -1.337283000 | 1.183099000  |
| C                                                   | -0.587734000 | -2.108792000 | 4.283179000  |
| C                                                   | -2.806290000 | -2.212470000 | 3.425977000  |
| C                                                   | -1.565674000 | -2.170619000 | 5.444636000  |
| H                                                   | 0.094589000  | -1.249496000 | 4.322910000  |
| H                                                   | -0.001013000 | -3.035102000 | 4.185292000  |
| C                                                   | -2.783648000 | -2.841100000 | 4.808538000  |
| H                                                   | -3.231896000 | -2.859920000 | 2.647587000  |
| H                                                   | -3.332412000 | -1.244974000 | 3.422528000  |
| H                                                   | -1.157587000 | -2.735955000 | 6.292051000  |
| H                                                   | -1.817153000 | -1.158810000 | 5.793964000  |
| H                                                   | -2.637507000 | -3.928619000 | 4.738132000  |
| H                                                   | -3.714257000 | -2.652595000 | 5.358790000  |
| O                                                   | -1.412262000 | -1.974751000 | 3.092053000  |
| H                                                   | -2.852603000 | -1.367255000 | -1.994524000 |
| Sum of electronic and thermal Energies=             |              |              | -1498.307825 |
| Sum of electronic and thermal Enthalpies=           |              |              | -1498.306880 |
| Sum of electronic and thermal Free Energies=        |              |              | -1498.404688 |
| Lowest vibration frequencies (/cm <sup>-1</sup> ) : | -255.4885    | 17.4630      | 26.4944      |

**Ar' = C<sub>6</sub>F<sub>5</sub>**

|    |              |              |              |
|----|--------------|--------------|--------------|
| Fe | -0.944778000 | -0.040499000 | -1.024677000 |
| C  | -0.511251000 | 1.121903000  | 0.628425000  |
| C  | 0.837900000  | 1.536272000  | 0.879453000  |
| C  | -1.501289000 | 1.956187000  | 1.240055000  |
| C  | 1.163447000  | 2.693522000  | 1.598432000  |
| H  | 1.666092000  | 0.949119000  | 0.466756000  |
| C  | -1.186927000 | 3.116517000  | 1.957167000  |
| H  | -2.560975000 | 1.708956000  | 1.116440000  |
| C  | 0.151128000  | 3.498657000  | 2.141095000  |
| H  | 2.212771000  | 2.973205000  | 1.731199000  |

|    |              |              |              |
|----|--------------|--------------|--------------|
| H  | -1.989825000 | 3.730520000  | 2.375870000  |
| H  | 0.399707000  | 4.403027000  | 2.700938000  |
| C  | -0.701115000 | -2.113131000 | -0.758304000 |
| C  | -1.751211000 | -3.051517000 | -0.771415000 |
| C  | 0.557088000  | -2.714414000 | -0.971383000 |
| C  | -1.613419000 | -4.412372000 | -1.041656000 |
| F  | -3.022563000 | -2.627490000 | -0.485263000 |
| C  | 0.765119000  | -4.064750000 | -1.244036000 |
| F  | 1.675169000  | -1.933139000 | -0.919693000 |
| C  | -0.336674000 | -4.929406000 | -1.290201000 |
| F  | -2.677119000 | -5.244601000 | -1.058238000 |
| F  | 2.000199000  | -4.562866000 | -1.466012000 |
| F  | -0.167064000 | -6.239010000 | -1.545627000 |
| C  | -0.497720000 | -0.000761000 | -2.924391000 |
| C  | 0.643536000  | 0.838460000  | -3.077175000 |
| C  | -0.742234000 | -0.932206000 | -3.968711000 |
| C  | 1.524917000  | 0.690737000  | -4.153499000 |
| H  | 0.858162000  | 1.614327000  | -2.336774000 |
| C  | 0.129355000  | -1.062804000 | -5.051039000 |
| H  | -1.625898000 | -1.571558000 | -3.927131000 |
| C  | 1.278387000  | -0.260564000 | -5.153411000 |
| H  | 2.405457000  | 1.336414000  | -4.218061000 |
| H  | -0.088721000 | -1.802271000 | -5.827221000 |
| H  | 1.954109000  | -0.362846000 | -6.005055000 |
| C  | -2.113352000 | 0.874207000  | -2.280192000 |
| C  | -3.350403000 | 0.200671000  | -2.485538000 |
| C  | -2.112027000 | 2.279891000  | -2.495496000 |
| C  | -4.521521000 | 0.900688000  | -2.800559000 |
| C  | -3.280308000 | 2.970396000  | -2.819920000 |
| H  | -1.182301000 | 2.843049000  | -2.400790000 |
| C  | -4.501856000 | 2.291759000  | -2.967833000 |
| H  | -5.455843000 | 0.347242000  | -2.932258000 |
| H  | -3.238051000 | 4.053872000  | -2.963177000 |
| H  | -5.412006000 | 2.834692000  | -3.230834000 |
| Mg | -0.735268000 | -1.039135000 | 1.343279000  |
| C  | 0.500279000  | -2.025048000 | 4.086765000  |
| C  | -1.646679000 | -2.986107000 | 3.675134000  |
| C  | -0.010714000 | -2.666779000 | 5.364294000  |
| H  | 0.780799000  | -0.969928000 | 4.199909000  |
| H  | 1.341616000  | -2.583747000 | 3.649217000  |
| C  | -0.987774000 | -3.715681000 | 4.833098000  |
| H  | -1.967740000 | -3.642489000 | 2.856003000  |
| H  | -2.495932000 | -2.368222000 | 4.004485000  |
| H  | 0.805153000  | -3.101269000 | 5.955672000  |
| H  | -0.533242000 | -1.926771000 | 5.987406000  |
| H  | -0.448884000 | -4.604505000 | 4.475033000  |
| H  | -1.722075000 | -4.035785000 | 5.582902000  |
| O  | -0.618291000 | -2.094350000 | 3.155258000  |



|                                                     |             |              |              |
|-----------------------------------------------------|-------------|--------------|--------------|
| H                                                   | -3.40322000 | -0.885373000 | -2.404239000 |
| Sum of electronic and thermal Energies=             |             |              | -1978.226018 |
| Sum of electronic and thermal Enthalpies=           |             |              | -1978.225074 |
| Sum of electronic and thermal Free Energies=        |             |              | -1978.330188 |
| Lowest vibration frequencies (/cm <sup>-1</sup> ) : | -307.7219   | -10.7402     | 17.4625      |

**Transition state for the reductive elimination of Ph-Ph in [Ph<sub>3</sub>Fe<sup>II</sup>]<sup>-</sup> (S = 1)**

|                                                     |              |              |              |
|-----------------------------------------------------|--------------|--------------|--------------|
| Fe                                                  | 0.392922000  | 0.005251000  | -0.002010000 |
| C                                                   | -1.295081000 | -0.897295000 | -0.031324000 |
| C                                                   | -1.851222000 | -1.485154000 | -1.217652000 |
| C                                                   | -1.570354000 | -1.603982000 | 1.191789000  |
| C                                                   | -2.522997000 | -2.706812000 | -1.191511000 |
| H                                                   | -1.731647000 | -0.980015000 | -2.178074000 |
| C                                                   | -2.236651000 | -2.829339000 | 1.204322000  |
| C                                                   | -2.720347000 | -3.405388000 | 0.014934000  |
| H                                                   | -2.902295000 | -3.125339000 | -2.128996000 |
| H                                                   | -2.384584000 | -3.346259000 | 2.157736000  |
| H                                                   | -3.254631000 | -4.357499000 | 0.030422000  |
| C                                                   | -1.294631000 | 0.908433000  | 0.029616000  |
| C                                                   | -1.849070000 | 1.496682000  | 1.216544000  |
| C                                                   | -1.571079000 | 1.615093000  | -1.193258000 |
| C                                                   | -2.520445000 | 2.718579000  | 1.191039000  |
| H                                                   | -1.728507000 | 0.991631000  | 2.176890000  |
| C                                                   | -2.236939000 | 2.840679000  | -1.205157000 |
| H                                                   | -1.222631000 | 1.205983000  | -2.145112000 |
| C                                                   | -2.719002000 | 3.417058000  | -0.015263000 |
| H                                                   | -2.898453000 | 3.137382000  | 2.128922000  |
| H                                                   | -2.385811000 | 3.357536000  | -2.158460000 |
| H                                                   | -3.252958000 | 4.369361000  | -0.030236000 |
| C                                                   | 2.365780000  | 0.005405000  | -0.004305000 |
| C                                                   | 3.145995000  | 1.199180000  | 0.074319000  |
| C                                                   | 3.146359000  | -1.187982000 | -0.085108000 |
| C                                                   | 4.548423000  | 1.209177000  | 0.074444000  |
| C                                                   | 4.548788000  | -1.197263000 | -0.089386000 |
| C                                                   | 5.267959000  | 0.006137000  | -0.008535000 |
| H                                                   | 2.636874000  | -2.157812000 | -0.148207000 |
| H                                                   | 5.087217000  | 2.160878000  | 0.138037000  |
| H                                                   | 5.087875000  | -2.148696000 | -0.154509000 |
| H                                                   | 6.361135000  | 0.006414000  | -0.010156000 |
| H                                                   | 2.636203000  | 2.168750000  | 0.138918000  |
| H                                                   | -1.220663000 | -1.195111000 | 2.143286000  |
| Sum of electronic and thermal Energies=             |              |              | -818.598779  |
| Sum of electronic and thermal Enthalpies=           |              |              | -818.597834  |
| Sum of electronic and thermal Free Energies=        |              |              | -818.663330  |
| Lowest vibration frequencies (/cm <sup>-1</sup> ) : | -284.7438    | -19.0560     | 17.4641      |

**Ph-Ph**

|                                                     |              |              |                                                |
|-----------------------------------------------------|--------------|--------------|------------------------------------------------|
| C                                                   | 0.000000000  | 0.000000000  | -0.742635000                                   |
| C                                                   | -0.452791000 | -1.120649000 | -1.468187000                                   |
| C                                                   | 0.452791000  | 1.120649000  | -1.468187000                                   |
| C                                                   | -0.453435000 | -1.120620000 | -2.866712000                                   |
| C                                                   | 0.453435000  | 1.120620000  | -2.866712000                                   |
| C                                                   | 0.000000000  | 0.000000000  | -3.573257000                                   |
| H                                                   | -0.830537000 | -1.993017000 | -0.931794000                                   |
| H                                                   | 0.830537000  | 1.993017000  | -0.931794000                                   |
| H                                                   | -0.817863000 | -1.997618000 | -3.405788000                                   |
| H                                                   | 0.817863000  | 1.997618000  | -3.405788000                                   |
| H                                                   | 0.000000000  | 0.000000000  | -4.664972000                                   |
| C                                                   | 0.000000000  | 0.000000000  | 0.742635000                                    |
| C                                                   | -0.452791000 | 1.120649000  | 1.468187000                                    |
| C                                                   | 0.452791000  | -1.120649000 | 1.468187000                                    |
| C                                                   | -0.453435000 | 1.120620000  | 2.866712000                                    |
| C                                                   | 0.453435000  | -1.120620000 | 2.866712000                                    |
| C                                                   | 0.000000000  | 0.000000000  | 3.573257000                                    |
| H                                                   | -0.830537000 | 1.993017000  | 0.931794000                                    |
| H                                                   | 0.830537000  | -1.993017000 | 0.931794000                                    |
| H                                                   | -0.817863000 | 1.997618000  | 3.405788000                                    |
| H                                                   | 0.817863000  | -1.997618000 | 3.405788000                                    |
| H                                                   | 0.000000000  | 0.000000000  | 4.664972000                                    |
| Sum of electronic and thermal Energies=             |              |              | -462.934463                                    |
| Sum of electronic and thermal Enthalpies=           |              |              | -462.933519                                    |
| Sum of electronic and thermal Free Energies=        |              |              | -462.977202                                    |
| Lowest vibration frequencies (/cm <sup>-1</sup> ) : |              |              | 67.5411            89.1712            115.7508 |

**Ph-(2-Py)**

|   |              |              |              |
|---|--------------|--------------|--------------|
| C | 0.765480000  | 0.018071000  | -0.002748000 |
| N | 1.373145000  | -1.137522000 | -0.349995000 |
| C | 1.501144000  | 1.163075000  | 0.364130000  |
| C | 2.711967000  | -1.167187000 | -0.358457000 |
| C | 2.895744000  | 1.113354000  | 0.344673000  |
| C | 3.525008000  | -0.076724000 | -0.030533000 |
| H | 0.991894000  | 2.072226000  | 0.683676000  |
| H | 3.162303000  | -2.121710000 | -0.648722000 |
| H | 3.481226000  | 1.989689000  | 0.629518000  |
| H | 4.611820000  | -0.163993000 | -0.061519000 |
| C | -0.721916000 | 0.016595000  | -0.004521000 |
| C | -1.459864000 | 1.170463000  | -0.334352000 |
| C | -1.427889000 | -1.158037000 | 0.322465000  |
| C | -2.858299000 | 1.151738000  | -0.329821000 |
| C | -2.825019000 | -1.174045000 | 0.334387000  |
| C | -3.547431000 | -0.018978000 | 0.008395000  |
| H | -0.942610000 | 2.085710000  | -0.626148000 |
| H | -0.868421000 | -2.058488000 | 0.576904000  |
| H | -3.410419000 | 2.053921000  | -0.600644000 |
| H | -3.352293000 | -2.092312000 | 0.601179000  |

|                                                     |              |              |             |             |          |
|-----------------------------------------------------|--------------|--------------|-------------|-------------|----------|
| H                                                   | -4.639076000 | -0.032319000 | 0.014017000 |             |          |
| Sum of electronic and thermal Energies=             |              |              |             | -478.980263 |          |
| Sum of electronic and thermal Enthalpies=           |              |              |             | -478.979319 |          |
| Sum of electronic and thermal Free Energies=        |              |              |             | -479.024397 |          |
| Lowest vibration frequencies (/cm <sup>-1</sup> ) : | 49.7017      |              | 88.2158     |             | 126.2633 |

**[PhFe<sup>0</sup>(η<sup>6</sup>-PhPh)]<sup>-</sup> (S = 1)**

|                                                     |              |              |              |             |         |
|-----------------------------------------------------|--------------|--------------|--------------|-------------|---------|
| Fe                                                  | 0.866809000  | 1.290114000  | -0.181823000 |             |         |
| C                                                   | -1.267371000 | 1.010996000  | 0.185328000  |             |         |
| C                                                   | -0.584212000 | 1.477413000  | 1.360793000  |             |         |
| C                                                   | -1.002012000 | 1.695321000  | -1.052357000 |             |         |
| C                                                   | 0.251888000  | 2.631110000  | 1.324644000  |             |         |
| H                                                   | -0.719691000 | 0.953112000  | 2.309229000  |             |         |
| C                                                   | -0.179518000 | 2.862593000  | -1.092201000 |             |         |
| H                                                   | -1.422031000 | 1.310862000  | -1.984182000 |             |         |
| C                                                   | 0.448579000  | 3.335019000  | 0.098257000  |             |         |
| H                                                   | 0.758491000  | 2.962477000  | 2.234927000  |             |         |
| H                                                   | 0.024360000  | 3.350064000  | -2.048702000 |             |         |
| H                                                   | 1.135233000  | 4.183987000  | 0.056181000  |             |         |
| C                                                   | -2.157048000 | -0.165088000 | 0.230505000  |             |         |
| C                                                   | -1.929057000 | -1.250362000 | 1.111004000  |             |         |
| C                                                   | -3.296553000 | -0.248064000 | -0.605532000 |             |         |
| C                                                   | -2.794179000 | -2.346100000 | 1.158951000  |             |         |
| H                                                   | -1.040485000 | -1.248884000 | 1.743313000  |             |         |
| C                                                   | -4.155408000 | -1.351253000 | -0.567600000 |             |         |
| H                                                   | -3.526312000 | 0.579203000  | -1.279625000 |             |         |
| C                                                   | -3.915608000 | -2.409887000 | 0.318377000  |             |         |
| H                                                   | -2.580556000 | -3.167894000 | 1.847162000  |             |         |
| H                                                   | -5.026892000 | -1.376400000 | -1.226900000 |             |         |
| H                                                   | -4.587288000 | -3.270316000 | 0.352102000  |             |         |
| C                                                   | 2.005576000  | -0.356793000 | -0.173584000 |             |         |
| C                                                   | 3.053250000  | -0.571097000 | 0.771729000  |             |         |
| C                                                   | 1.953925000  | -1.350319000 | -1.196108000 |             |         |
| C                                                   | 3.949960000  | -1.649656000 | 0.714042000  |             |         |
| C                                                   | 2.838529000  | -2.437373000 | -1.274137000 |             |         |
| C                                                   | 3.850569000  | -2.598113000 | -0.315329000 |             |         |
| H                                                   | 3.173854000  | 0.134319000  | 1.603425000  |             |         |
| H                                                   | 1.177870000  | -1.281028000 | -1.967784000 |             |         |
| H                                                   | 4.728968000  | -1.755381000 | 1.477354000  |             |         |
| H                                                   | 2.737422000  | -3.167825000 | -2.084557000 |             |         |
| H                                                   | 4.540878000  | -3.444677000 | -0.365829000 |             |         |
| Sum of electronic and thermal Energies=             |              |              |              | -818.659080 |         |
| Sum of electronic and thermal Enthalpies=           |              |              |              | -818.658135 |         |
| Sum of electronic and thermal Free Energies=        |              |              |              | -818.722053 |         |
| Lowest vibration frequencies (/cm <sup>-1</sup> ) : | 27.3367      |              | 48.2356      |             | 52.0223 |

**Ph<sub>2</sub>Fe<sup>0</sup>(η<sup>6</sup>-PhPh)•(Mg(THF)) (S = 0)**

|    |              |             |              |  |  |
|----|--------------|-------------|--------------|--|--|
| Fe | -0.532101000 | 0.458813000 | -1.104845000 |  |  |
|----|--------------|-------------|--------------|--|--|

|    |              |              |              |
|----|--------------|--------------|--------------|
| C  | 0.289671000  | 1.411905000  | 0.478561000  |
| C  | 1.459021000  | 0.971865000  | 1.179741000  |
| C  | -0.167619000 | 2.696111000  | 0.931941000  |
| C  | 2.126775000  | 1.731885000  | 2.151828000  |
| H  | 1.883497000  | -0.004747000 | 0.946592000  |
| C  | 0.489766000  | 3.469896000  | 1.895749000  |
| H  | -1.082131000 | 3.112041000  | 0.502905000  |
| C  | 1.657525000  | 3.000213000  | 2.516357000  |
| H  | 3.029937000  | 1.328426000  | 2.621100000  |
| H  | 0.081672000  | 4.448040000  | 2.169922000  |
| H  | 2.176709000  | 3.599989000  | 3.267481000  |
| C  | -0.061384000 | -1.397550000 | -0.564560000 |
| C  | -0.992927000 | -2.469285000 | -0.376279000 |
| C  | 1.298176000  | -1.839423000 | -0.588743000 |
| C  | -0.622966000 | -3.815146000 | -0.199819000 |
| H  | -2.069366000 | -2.252253000 | -0.409087000 |
| C  | 1.682655000  | -3.175722000 | -0.437407000 |
| H  | 2.086546000  | -1.111443000 | -0.789815000 |
| C  | 0.725186000  | -4.181448000 | -0.224070000 |
| H  | -1.397384000 | -4.575113000 | -0.058084000 |
| H  | 2.743246000  | -3.440133000 | -0.494254000 |
| H  | 1.026644000  | -5.223526000 | -0.095017000 |
| C  | 0.479931000  | 0.819594000  | -2.993269000 |
| C  | -0.461459000 | -0.259379000 | -3.054353000 |
| C  | -0.021465000 | 2.017105000  | -2.388875000 |
| C  | -1.812611000 | -0.147231000 | -2.627084000 |
| H  | -0.114298000 | -1.245921000 | -3.365088000 |
| C  | -1.381522000 | 2.168219000  | -2.006621000 |
| H  | 0.645420000  | 2.865626000  | -2.227254000 |
| C  | -2.273510000 | 1.061421000  | -2.034828000 |
| H  | -2.447715000 | -1.034488000 | -2.645086000 |
| H  | -1.697422000 | 3.110059000  | -1.556812000 |
| H  | -3.314204000 | 1.173808000  | -1.719583000 |
| Mg | -1.282211000 | -0.174911000 | 1.090623000  |
| C  | 1.847489000  | 0.699361000  | -3.527843000 |
| C  | 2.130650000  | -0.164805000 | -4.613709000 |
| C  | 2.934078000  | 1.435353000  | -2.995198000 |
| C  | 3.424582000  | -0.295673000 | -5.127312000 |
| H  | 1.319185000  | -0.725319000 | -5.080822000 |
| C  | 4.223838000  | 1.310802000  | -3.514379000 |
| H  | 2.772821000  | 2.092372000  | -2.139971000 |
| C  | 4.484850000  | 0.441173000  | -4.584621000 |
| H  | 3.601321000  | -0.970280000 | -5.968796000 |
| H  | 5.037474000  | 1.890010000  | -3.070709000 |
| H  | 5.494961000  | 0.342157000  | -4.987112000 |
| O  | -2.526153000 | -0.571721000 | 2.795566000  |
| C  | -2.508357000 | 0.192262000  | 4.034247000  |
| C  | -3.534613000 | -1.615626000 | 2.872979000  |

|                                                     |              |              |              |                 |
|-----------------------------------------------------|--------------|--------------|--------------|-----------------|
| C                                                   | -3.769004000 | -0.218379000 | 4.775460000  |                 |
| C                                                   | -3.942025000 | -1.672112000 | 4.335576000  |                 |
| H                                                   | -4.374211000 | -1.327629000 | 2.221474000  |                 |
| H                                                   | -2.471780000 | 1.257879000  | 3.773487000  |                 |
| H                                                   | -4.625174000 | 0.390772000  | 4.451313000  |                 |
| H                                                   | -1.596068000 | -0.077211000 | 4.588489000  |                 |
| H                                                   | -3.658518000 | -0.107391000 | 5.861713000  |                 |
| H                                                   | -4.968649000 | -2.039588000 | 4.459903000  |                 |
| H                                                   | -3.268110000 | -2.332195000 | 4.900685000  |                 |
| H                                                   | -3.088298000 | -2.545817000 | 2.499476000  |                 |
| Sum of electronic and thermal Energies=             |              |              | -1482.303057 |                 |
| Sum of electronic and thermal Enthalpies=           |              |              | -1482.302113 |                 |
| Sum of electronic and thermal Free Energies=        |              |              | -1482.395358 |                 |
| Lowest vibration frequencies (/cm <sup>-1</sup> ) : |              |              | 19.0179      | 22.4478 30.3120 |

## 6. EPR spectroscopy

X-band EPR spectra were recorded on a Bruker ELEXSYS 500 spectrometer equipped with a Bruker ER 4116DM X band resonator, an Oxford Instrument continuous flow ESR 900 cryostat, and an Oxford ITC 503 temperature control system.

Speciation of iron(II) ( $S = 1/2$ ) has been performed by double integration of the 250-370 mT area and was performed against a methanol solution of  $\text{CuSO}_4$  whose signal was double-integrated on the same field area.

EPR analysis of solutions of  $\text{Fe}(\text{acac})_3$  reduced with  $\text{ArMgBr}$  ( $\text{Ar} = p\text{-F-C}_6\text{F}_4$  or  $p\text{-MeO-C}_6\text{H}_4$ ) followed by addition of  $\text{C}_6\text{F}_5\text{Cl}$  or 2-PyCl:

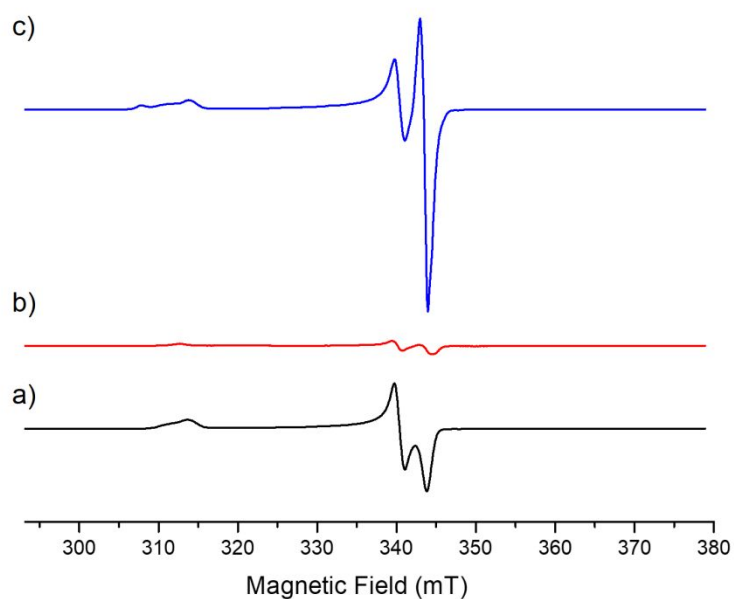

Figure S3 : X-band EPR analysis ( $T = 90$  K) of a solution of a)  $\text{Fe}(\text{acac})_3$  (9 mM in a 98:2 THF:2-MeTHF mixture) treated by 15 equiv.  $p\text{-F-C}_6\text{H}_4\text{MgBr}$  ( $g = 2.194; 2.022; 2.002$ ); b), c): the same, after addition of resp.  $\text{C}_6\text{F}_5\text{Cl}$  or 2-PyCl (10 equiv. vs Fe); samples frozen after a 10 min reaction time at room temperature.

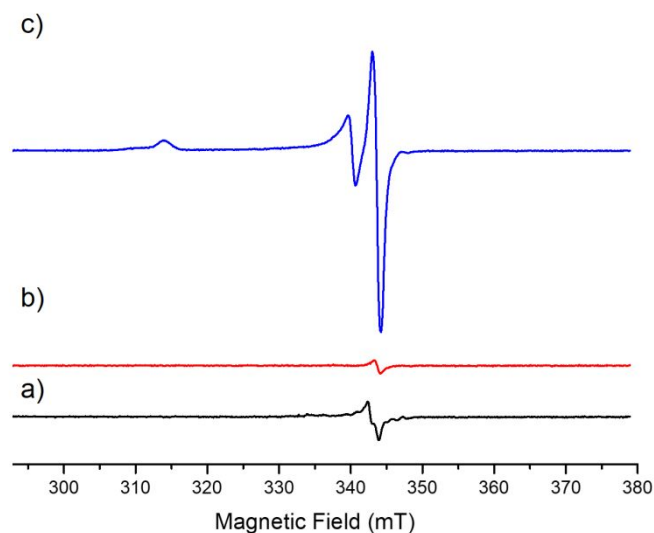

Figure S4 : X-band EPR analysis ( $T = 90$  K) of a solution of a)  $\text{Fe}(\text{acac})_3$  (9 mM in a 98:2 THF:2-MeTHF mixture) treated by 15 equiv.  $p\text{-MeO-C}_6\text{H}_4\text{MgBr}$ ; b), c): the same, after addition of resp.  $\text{C}_6\text{F}_5\text{Cl}$  or 2-PyCl (10 equiv. vs Fe); samples frozen after a 10 min reaction time at room temperature.

Speciation of the low-spin iron(I) oxidation state with respect to the overall iron quantity in the spectra displayed in Figures S3 and S4:

Figure S3: a) 9.6%; b) 2.3%; c) 14%

Figure S4: a) 0.2%; b) 0.1%; c) 1.5%

## 7. Experimental Hammett plots

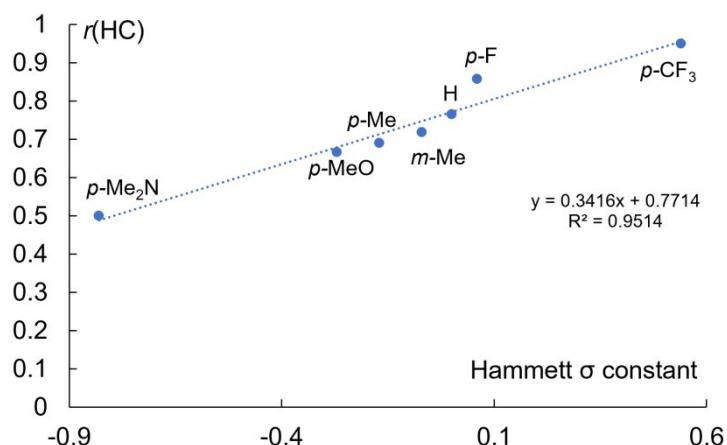

Figure S5: experimental evolution of the homo-coupling (hc) versus cross-coupling (cc) ratio  $r_{\text{hc}}$  for ArMgBr / 2-PyCl coupling systems reported in Table 1.

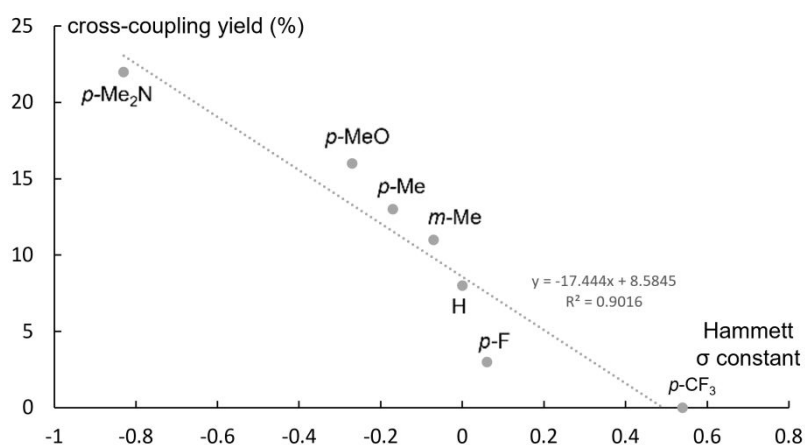

Figure S6: Experimental Hammett plot for the cross-coupling between ArMgBr and 2-PyCl (conditions of Table 1) as a function of the Hammett constant of the Ar substituents.

## 8. References

- [1] Karimi, B.; Mansouri, F.; Vali, H. A highly water-dispersible/magnetically separable palladium catalyst based on a Fe<sub>3</sub>O<sub>4</sub>@SiO<sub>2</sub> anchored TEG-imidazolium ionic liquid for the Suzuki–Miyaura coupling reaction in water. *Green Chem.* **2014**, *16*, 2587-2596.
- [2] Minus, Matthew B.; Moor, Sarah R.; Pary, Fathima F.; Nirmani, L. P. T.; Chwatko, Malgorzata; Okeke, Brandon; Singleton, Josh E.; Nelson, Toby L.; Lynd, Nathaniel A.; Anslyn, Eric V. *Org. Lett.* **2021**, *23*, 2873-2877.



- [3] Iglesias, M. J.; Prieto, A.; Nicasio, M. C. Kumada–Tamao–Corriu coupling of heteroaromatic chlorides and aryl ethers catalyzed by (IPr)Ni(allyl)Cl. *Org. Lett.* **2012**, *14*, 4318–4321.
- [4] Ouyang, J-S.; Li, Y-F.; Huang, F-D.; Lu, D-D.; Liu, F.-S. The Highly Efficient Suzuki-Miyaura Cross-Coupling of (Hetero)aryl Chlorides and (Hetero)arylboronic Acids Catalyzed by "Bulky-yet-Flexible" Palladium-PEPPSI Complexes in Air. *Chem. Cat. Chem.* **2018**, *10*, 371-375.
- [5] Li, X.; Li, D.; Bai, Y.; Zhang, C.; Chang, H.; Gao, W.; Wei, W. Homocoupling reactions of terminal alkynes and arylboronic compounds catalyzed by in situ formed Al(OH)<sub>3</sub>-supported palladium nanoparticles. *Tetrahedron.* **2016**, *72*, 6996–7002.
- [6] Liu, Y.; Berges, J.; Zaid, Y.; Chahdi, F.-O.; Van Der Lee, A.; Harakat, D.; Clot, E.; Jaroschik, F.; Taillefer, M. Aerobic and Ligand-free Manganese-Catalyzed Homocoupling of Arenes or Aryl Halides via in-situ Formation of Aryllithiums. *J. Org. Chem.* **2019**, *84*, 4413-4420.
- [7] Cahiez, G.; Chaboche, C.; Mahuteau-Betzer, F.; Ahr, M. Iron-catalyzed homo-coupling of simple and functionalized arylmagnesium reagents. *Org. Lett.* **2005**, *7*, 1943.
- [8] Shen, Y.; Qui, W. A one-pot synthesis of pentafluoro- and polyfluorophenyl alkyl ketones. *J. Fluorine Chem.* **1988**, *38*, 175.
- [9] Tao, J.-L.; Wang, Z.-X. Nickel-Catalyzed Cross-Coupling of (Hetero)aryl Chlorides with Aryllithium Compounds. *Asian J. Org. Chem.* **2016**, *5*, 521-527.
- [10] Gombert, A.; McKay, A.-I.; Davis, C.-J.; Wheelhouse, K.-M.; Willis, M.-C. Mechanistic Studies of the Palladium-Catalyzed Desulfative Cross-Coupling of Aryl Bromides and (Hetero)Aryl Sulfinate Salts. *J. Am. Chem. Soc.* **2020**, *142*, 3564-3576.
- [11] Shon, J.-H.; Kim, D.; Rathnayake, M.-D.; Sittel, S.; Weaver, J.; Teets, T.-S. Photoredox catalysis on unactivated substrates with strongly reducing iridium photosensitizers. *Chem. Sci.* **2021**, *12*, 4069-4078.
- [12] Liu, X.; Zhao, X.; Liang, F.; Ren, B. *t*-BuONa-mediated direct C–H halogenation of electron-deficient (hetero)arenes. *Org. Biomol. Chem.* **2018**, *16*, 886-890.
- [13] Budiman, Y.-P.; Jayaraman, A.; Friedrich, A.; Kerner, F.; Radius, U.; Marder, T.-B. Palladium-Catalyzed Homocoupling of Highly Fluorinated Arylboronates: Studies of the Influence of Strongly vs Weakly Coordinating Solvents on the Reductive Elimination Process. *J. Am. Chem. Soc.* **2020**, *142*, 6036-6050.
- [14] Gaussian 09, Revision D.01, M. J. Frisch *et al.*, Gaussian, Inc., Wallingford CT, 2013.
- [15] Swart, M.; Ehlers, A. W.; Lammertsma, K. Performance of the OPBE Exchange-Correlation Functional. *Mol. Phys.* **2004**, *102*, 2467–2474.
- [16] Swart, M.; Groenhof, A. R.; Ehlers, A. W.; Lammertsma, K. Validation of Exchange–Correlation Functionals for Spin States of Iron Complexes. *J. Phys. Chem. A* **2004**, *108*, 25, 5479–5483.
- [17] Swart, M. Accurate Spin-State Energies for Iron Complexes. *J. Chem. Theory Comput.* **2008**, *4*, 12, 2057–2066.

- [18] S. Miertus, E. Scrocco, J. Tomasi Electrostatic interaction of a solute with a continuum. A direct utilization of AB initio molecular potentials for the prevision of solvent effects, *Chem. Phys.* **1981**, *55*, 117-129.
- [19] G. Scalmani, M. J. Frisch, B. Mennucci, J. Tomasi, R. Cammi, V. Barone Geometries and properties of excited states in the gas phase and in solution: Theory and application of a time-dependent density functional theory polarizable continuum model, *J. Chem. Phys.* **2006**, *124*, 094107.
- [20] Weigend, F.; Ahlrichs, R. Balanced basis sets of split valence, triple zeta valence and quadruple zeta valence quality for H to Rn: Design and assessment of accuracy. *Phys. Chem. Chem. Phys.* **2005**, *7*, 3297-3305.
- [21] Weigend, F. Accurate Coulomb-fitting basis sets for H to Rn. *Phys. Chem. Chem. Phys.*, **2006**, *8*, 1057-1065.
